# Supplementary material for: Benchmarking metagenomics classifiers on ancient viral DNA: a simulation study
Source: bioRxiv preprint, doi:10.1101/2021.04.30.442132, version 2 (2021-11-30)
Supplement: table_S02_viral_classification [file 442132_file02.xlsx]

## Sheet: Centrifuge
taxID

## Sheet: Kraken2
taxID

## Sheet: DIAMOND
taxID

## Sheet: MetaPhlAn2
taxID
