# Supplementary material for: Benchmarking metagenomics classifiers on ancient viral DNA: a simulation study
Source: bioRxiv preprint, doi:10.1101/2021.04.30.442132, version 2 (2021-11-30)
Supplement: table_S03_human_simulation_extra_taxa [file 442132_file03.xlsx]

## Sheet: Centrifuge
reads	taxID	taxName	rank
3245970	67082	BeAn 58058 virus	species
1046696	10239	Viruses	superkingdom
368067	153301	Baboon cytomegalovirus OCOM4-37	no rank
145974	166122	Human endogenous retrovirus K113	no rank
123931	39640	Cotesia congregata bracovirus	species
96706	1349410	Pandoravirus salinus	species
96059	2107707	Pandoravirus macleodensis	species
89033	1349409	Pandoravirus dulcis	species
81799	2107709	Pandoravirus quercus	species
65565	872291	Heterobasidion partitivirus 2	species
62580	2060084	Pandoravirus	genus
61439	2732396	Orthornavirae	kingdom
49366	1605721	Pandoravirus inopinatum	species
48967	2083300	Diolcogaster facetosa bracovirus	species
39444	2107708	Pandoravirus neocaledonia	species
32813	2035399	Eptesicus fuscus gammaherpesvirus	species
32581	1969841	Proteus phage VB_PmiS-Isfahan	no rank
31791	2029293	Squirrelpox virus Berlin_2015	species
30857	1678078	Mollivirus sibericum	species
29662	2560065	Herelleviridae	family
28593	419435	Glypta fumiferanae ichnovirus	species
26622	265522	Hyposoter fugitivus ichnovirus	species
23809	2023057	Orpheovirus IHUMI-LCC2	species
23247	97195	Heterosigma akashiwo virus 01	species
22555	116759	Glyptapanteles indiensis bracovirus	species
22199	10390	Gallid alphaherpesvirus 2	species
22161	2732408	Pisuviricota	phylum
21569	1654582	Kallithea virus	no rank
21406	317858	Cyprinid herpesvirus 1	species
21231	33706	Caviid betaherpesvirus 2	species
20869	317878	Cyprinid herpesvirus 2	species
20623	2072209	Esparto virus	no rank
20583	857312	Brochothrix phage A9	no rank
19469	28883	Caudovirales	order
19019	41856	Hepatitis C virus genotype 1	genotype
18476	1980410	Bunyavirales	order
18079	180230	Cyprinid herpesvirus 3	species
17927	10401	Ictalurid herpesvirus 1	species
17054	10280	Molluscum contagiosum virus subtype 1	no rank
16018	146015	Elephantid betaherpesvirus 1	species
14418	693450	Alstroemeria necrotic streak virus	no rank
13806	10485	Bracovirus	genus
13706	60456	Iris yellow spot virus	no rank
13446	1241371	Abalone herpesvirus Victoria/AUS/2009	no rank
13036	2306623	Areca palm necrotic spindle-spot virus	species
12608	1460451	Gordil virus	no rank
12557	1269028	Acanthamoeba polyphaga moumouvirus	no rank
11888	10685	Bacillus virus SPO1	species
11698	1329650	Bat circovirus	species
11274	2601628	Salmonella phage 1-29	no rank
11116	10371	Equid gammaherpesvirus 5	species
11022	251749	Phaeocystis globosa virus	species
10778	455364	Chrysochromulina ericina virus	species
10356	1266451	Mulberry vein banding virus	species
10200	379529	Glossina pallidipes salivary gland hypertrophy virus	no rank
10167	1608125	Wuhan Millipede Virus 2	no rank
9507	35258	Lambdapapillomavirus 2	species
9234	12315	Tomato aspermy virus	species
8620	333760	Human papillomavirus type 16	serotype
8394	11970	Woolly monkey sarcoma virus	species
8303	1094892	Megavirus chiliensis	species
8156	10482	Polydnaviridae	family
8112	2499625	Stemphylium lycopersici mycovirus	species
8099	1788442	Circovirus-like genome DCCV-2	species
8086	12330	Maize stripe tenuivirus	species
8065	11012	Partitiviridae	family
7995	1474867	Aureococcus anophagefferens virus	species
7811	53988	Microplitis demolitor bracovirus	species
7687	2419939	Tea plant necrotic ring blotch virus	species
7510	2169853	Crohivirus A	species
7245	1922616	Beihai picorna-like virus 7	species
7111	1932886	Acinetobacter phage vB_AbaP_AS11	no rank
7110	1087068	Aspergillus foetidus dsRNA mycovirus	species
6995	1580580	Agrotis segetum nucleopolyhedrovirus B	species
6979	50292	Cercopithecine betaherpesvirus 5	species
6914	29271	Dasheen mosaic virus	species
6907	10699	Siphoviridae	family
6845	10456	Spodoptera littoralis nucleopolyhedrovirus	species
6707	148879	Banana mild mosaic virus	species
6680	10358	Cytomegalovirus	genus
6643	307461	Apocheima cinerarium nucleopolyhedrovirus	species
6635	1239578	Mamastrovirus 14	species
6569	11103	Hepacivirus C	species
6449	2732506	Pisoniviricetes	class
6256	548681	Herpesvirales	order
6248	256729	Lymphocystis disease virus - isolate China	species
6230	11612	Impatiens necrotic spot virus	no rank
6084	35250	Gallid alphaherpesvirus 3	species
5865	1962501	Agrotis segetum nucleopolyhedrovirus A	species
5658	1423347	Sclerotinia sclerotiorum hypovirus 2	species
5656	35254	Cryptophlebia leucotreta granulovirus	species
5651	552509	Leptopilina boulardi filamentous virus	species
5611	1560313	Lactococcus phage WRP3	no rank
5598	12657	Equid gammaherpesvirus 2	species
5595	439016	Marine RNA virus JP-B	no rank
5586	759389	Verticillium dahliae chrysovirus 1	species
5381	2721760	Pantoea phage vB_PagM_SSEM1	no rank
5357	54289	Vicia cryptic virus	species
5228	2732007	Nucleocytoviricota	phylum
5219	1006972	Campylobacter virus IBB35	species
5200	2231345	Salmonella phage S116	no rank
5153	2871093	tremovirus A1	no rank
5150	28321	Amsacta moorei entomopoxvirus	species
5107	10292	Herpesviridae	family
5088	58094	Choristoneura rosaceana nucleopolyhedrovirus	species
5081	2057187	Drosophila innubila nudivirus	species
5067	46242	Spodoptera litura nucleopolyhedrovirus	species
5048	150286	Anguillid herpesvirus 1	species
5015	130556	Culex nigripalpus nucleopolyhedrovirus	species
4924	693272	Cafeteria roenbergensis virus BV-PW1	no rank
4883	2840070	Lefavirales	order
4874	92521	Oryctes rhinoceros nudivirus	species
4732	2731360	Heunggongvirae	kingdom
4727	1906244	Cyclophragma undans nucleopolyhedrovirus	species
4688	83442	Paramecium bursaria Chlorella virus NYs1	species
4685	2502306	Escherichia phage vB_EcoM_G4507	no rank
4628	10501	Phycodnaviridae	family
4604	1293572	Mythimna separata entomopoxvirus 'L'	no rank
4353	1846169	Macaca nemestrina herpesvirus 7	no rank
4256	11587	Punta Toro virus	no rank
4233	944969	Cynomolgus macaque cytomegalovirus strain Ottawa	no rank
4218	1239580	Mamastrovirus 16	species
4155	12450	Saccharomyces cerevisiae killer virus M1	species
4089	342409	White spot syndrome virus	species
4084	1798085	Piscine myocarditis-like virus	species
4044	487492	Mikania micrantha mosaic virus	no rank
4010	2419940	Tea plant line pattern virus	species
3978	159252	Planaria asexual strain-specific virus-like element type 1	species
3939	1544901	Hepatitis C virus genotype 7	genotype
3935	1546257	Tipula oleracea nudivirus	species
3903	2560196	Orthotospovirus	genus
3902	490711	Orgyia leucostigma nucleopolyhedrovirus	species
3884	42182	Hepatitis C virus genotype 6	genotype
3864	1923533	Wenling picorna-like virus 5	species
3827	70823	Dulcamara mottle virus	species
3820	93386	Columbid alphaherpesvirus 1	species
3791	1675865	Perigonia lusca single nucleopolyhedrovirus	no rank
3786	10317	Cercopithecine alphaherpesvirus 2	species
3729	31631	Human coronavirus OC43	no rank
3720	284687	Amasya cherry disease associated chrysovirus	species
3697	694002	Betacoronavirus	genus
3534	190065	Fowl aviadenovirus E	species
3438	28871	Taterapox virus	species
3416	330395	Listeria virus P100	species
3374	10255	Variola virus	species
3332	120686	human papillomavirus 71	serotype
3298	532078	Yersinia phage Yepe2	no rank
3290	10320	Bovine alphaherpesvirus 1	species
3269	1920772	Gentian ovary ringspot virus	species
3238	10483	Ichnovirus	genus
3162	37665	Ectocarpus siliculosus virus 1	species
3083	859651	Rosellinia necatrix partitivirus 2	species
3074	202910	Bubaline alphaherpesvirus 1	species
3030	208013	Agrotis ipsilon multiple nucleopolyhedrovirus	species
2999	764348	Magnaporthe oryzae chrysovirus 1	species
2978	328615	Trichoplusia ni ascovirus 2c	species
2945	1622193	Gordonia phage Gsput1	no rank
2917	2200830	Akhmeta virus	species
2902	1033976	Bean necrotic mosaic virus	no rank
2841	11137	Human coronavirus 229E	species
2829	631345	Solenopsis invicta virus 3	species
2822	113370	Spodoptera frugiperda ascovirus 1a	species
2813	1923488	Wenling crustacean virus 5	species
2794	1138490	Cachoeira Porteira virus	no rank
2781	337042	Alphapapillomavirus 7	species
2777	1857323	Tospovirus kiwifruit/YXW/2014	species
2767	1692045	Tobacco virus 1	species
2724	320432	Chrysodeixis chalcites nucleopolyhedrovirus	species
2713	1825688	Rhizoctonia solani dsRNA virus 3	species
2685	2018502	Myrmica scabrinodis virus 1	species
2685	2025333	Rosellinia necatrix partitivirus 8	species
2670	1293540	Adoxophyes honmai entomopoxvirus 'L'	no rank
2658	1273739	Bacillus virus Andromeda	species
2646	10397	Tupaiid betaherpesvirus 1	species
2635	358769	Classical swine fever virus - Alfort/187	no rank
2597	1810944	Tunis virus	no rank
2584	1667587	Papio ursinus cytomegalovirus	no rank
2584	1811230	Callinectes sapidus reovirus 1	species
2531	1836608	Canine kobuvirus	species
2512	2212644	Alstroemeria yellow spot virus	no rank
2510	2169746	Mythimna unipuncta granulovirus B	species
2510	558016	Alphabaculovirus	genus
2487	460926	Tomato zonate spot virus	no rank
2459	181083	Chlorovirus	genus
2448	40271	Hepatitis C virus genotype 2	genotype
2392	2756242	Aydin-like pestivirus	no rank
2390	1572341	Black sea bass polyomavirus 1	no rank
2388	307454	Spodoptera frugiperda granulovirus	species
2377	110456	Teseptimavirus	genus
2309	2508180	Escherichia phage vB_EcoM_KAW1E185	no rank
2309	304859	Tomato yellow ring virus	no rank
2293	1307954	Maruca vitrata nucleopolyhedrovirus	species
2288	1923752	Wuhan spider virus 3	species
2263	1923713	Wuhan house centipede virus 9	species
2255	1955175	Cordoba virus	species
2248	399781	Paramecium bursaria Chlorella virus FR483	no rank
2214	2008762	Hepacivirus B	species
2212	332937	Chimpanzee herpesvirus strain 105640	no rank
2189	2115790	Cervid alphaherpesvirus 3	species
2179	1419109	Harp seal herpesvirus	no rank
2178	1027232	Groundnut ringspot and Tomato chlorotic spot virus reassortant	species
2174	345585	Invertebrate iridescent virus 30	no rank
2159	1408894	Red clover cryptic virus 1	species
2151	1367203	Hemileuca sp. nucleopolyhedrovirus	no rank
2146	2848146	Perch actinovirus	species
2136	540070	Common midwife toad virus	species
2133	44026	Sepik virus	species
2132	2152923	Sogatella furcifera hepe-like virus	species
2131	10288	Choristoneura biennis entomopoxvirus	species
2104	59376	Ectropis obliqua nucleopolyhedrovirus	species
2017	28874	Volepox virus	species
2016	83872	Zucchini lethal chlorosis virus	no rank
2014	2315529	Gordonia phage Buggaboo	species
1994	436447	Brevicoryne brassicae virus - UK	no rank
1949	182452	Gentian mosaic virus	species
1916	1606765	Bovine rhinovirus 1	species
1915	227984	SARS coronavirus Tor2	no rank
1906	35318	Patois virus	serogroup
1902	520973	Calicivirus pig/AB90/CAN	no rank
1901	83191	Melanoplus sanguinipes entomopoxvirus	species
1888	12203	Maize dwarf mosaic virus	species
1876	2175117	Rhynchobatus djiddensis adomavirus 1	species
1868	373373	Rice stripe necrosis virus	species
1843	1849539	Fusarium poae alternavirus 1	species
1825	1100043	Apis mellifera filamentous virus	species
1808	1678146	Orthohepevirus D	species
1807	447604	Tomato yellow leaf curl Vietnam betasatellite	species
1796	1980493	Thottopalayam virus	no rank
1779	89471	Melon yellow spot virus	no rank
1771	181082	Emiliania huxleyi virus 86	species
1763	430606	Polygonum ringspot orthotospovirus	species
1757	74320	Buzura suppressaria nucleopolyhedrovirus	species
1754	1507984	Papaya leaf curl China betasatellite [China:Hainan:2014]	no rank
1724	2053981	Tomelloso virus	no rank
1724	764030	Pigeon adenovirus 1	serotype
1720	2170140	Chaetoceros protobacilladnavirus 1	species
1707	1254425	Porcine astrovirus 3	species
1697	132475	Yaba-like disease virus	no rank
1695	10662	Myoviridae	family
1672	1006061	Duck hepatitis A virus 1	no rank
1671	2293720	Mashua virus Y	species
1671	257464	Potato black ringspot virus	species
1669	62099	Anomala cuprea entomopoxvirus	species
1654	1659220	Kobuvirus cattle/Kagoshima-1-22-KoV/2014/JPN	no rank
1652	432587	Gryllus bimaculatus nudivirus	species
1644	2047868	Corynebacterium phage C3PO	no rank
1633	1933298	Tomato spotted wilt orthotospovirus	species
1625	235434	Ceratocystis polonica partitivirus	no rank
1618	1917232	Only Syngen Nebraska virus 5	species
1609	2572766	Caimito virus	no rank
1607	578305	Gayfeather mild mottle virus	species
1587	1922557	Beihai picorna-like virus 15	species
1562	1919083	Cynomolgus cytomegalovirus	species
1561	1408895	Dill cryptic virus 1	species
1561	79700	rat cytomegalovirus strain Maastricht	no rank
1559	273354	Sororoca virus	no rank
1558	1573459	Rosellinia necatrix partitivirus 6	species
1523	2773460	Wuchang romanomermis nematode virus 2	no rank
1513	980895	Soybean vein necrosis virus	no rank
1488	1819678	Cucurbit yellow mosaic alphasatellite	species
1487	262177	Orgyia pseudotsugata multiple nucleopolyhedrovirus	species
1486	464095	Picornavirales	order
1481	1958784	Bat dicibavirus	species
1468	2043550	Medicago sativa alphapartitivirus 1	species
1454	1813615	Picornavirales Bu-1	no rank
1446	10286	Betaentomopoxvirus	genus
1442	1293539	Choristoneura rosaceana entomopoxvirus 'L'	no rank
1434	2843418	Lillamyvirus	genus
1428	1922707	Beihai sphaeromadae virus 1	species
1425	1577776	Dendrolimus punctatus cypovirus 22	species
1420	1926502	Urucuri virus	no rank
1417	1586712	Yellowstone lake mimivirus	species
1411	42683	Paramecium bursaria Chlorella virus CVA-1	no rank
1411	631431	Heterobasidion partitivirus 3	species
1400	447897	Mythimna unipuncta nucleopolyhedrovirus	species
1396	1750712	Cnaphalocrocis medinalis granulovirus	species
1392	138184	Alcelaphine gammaherpesvirus 2	species
1392	1432856	Formica exsecta virus 1	species
1380	38012	Malacosoma neustria nucleopolyhedrovirus	species
1371	10366	Murid betaherpesvirus 1	species
1361	2292642	Turtle grass virus X	species
1359	2069320	Capsicum annuum amalgavirus 1	species
1352	47985	Grapevine leafroll-associated virus 1	species
1348	1076255	Yokapox virus	species
1344	2170538	Alfalfa virus F	species
1342	72201	Armadillidium vulgare iridescent virus	no rank
1336	1385385	Streptococcus phage TP-778L	species
1330	1922379	Beihai echinoderm virus 1	species
1323	1608105	Wuhan House Fly Virus 2	no rank
1317	1387301	Heterobasidion partitivirus 7	species
1317	1777069	Pseudomonas phage vB_PsyM_KIL4	no rank
1314	1411681	Rhizoctonia solani dsRNA virus 2	species
1309	2212563	CrAssphage sp.	species
1309	549779	Mimiviridae	family
1308	1675862	Diatraea saccharalis granulovirus	species
1294	1965472	Lactococcus phage AM4	no rank
1288	1605403	Non-primate hepacivirus NZP1	no rank
1283	2219105	Botrytis cinerea hypovirus 1	species
1277	1469906	Heterobasidion partitivirus 13	species
1276	1923751	Wuhan spider virus 2	species
1271	2013564	Fur seal picorna-like virus	species
1267	315393	Mimivirus	genus
1260	1455074	Enterobacter phage PG7	no rank
1259	10663	Tequatrovirus	genus
1224	85655	Ranid herpesvirus 1	species
1223	11096	Classical swine fever virus	no rank
1222	1712389	Tetterwort vein chlorosis virus	species
1221	359919	Spodoptera litura granulovirus	species
1217	1519389	Sewage-associated circular DNA virus-13	species
1216	101688	Apple latent spherical virus	species
1216	2282206	Bufonid herpesvirus 1	species
1209	1871153	Nylanderia fulva virus 1	species
1205	1307956	Leucania separata nucleopolyhedrovirus	species
1204	107804	Sorghum chlorotic spot virus	species
1201	46021	Paramecium bursaria Chlorella virus NY2A	species
1192	12643	Ectromelia virus	species
1182	11138	Murine hepatitis virus	no rank
1180	2704413	Lymphocystis disease virus 4	species
1179	1070315	Hyposidra talaca NPV	species
1177	2732544	Martellivirales	order
1160	192021	Chicory yellow mottle virus large satellite RNA	species
1155	1398149	Eel picornavirus 1	no rank
1154	548914	Elephant endotheliotropic herpesvirus 4	species
1143	176652	Invertebrate iridescent virus 6	species
1142	1978413	Watermelon virus A	species
1141	35244	Bovine alphaherpesvirus 5	species
1124	1958778	Bat iflavirus	species
1123	12235	Cucumber green mottle mosaic virus	species
1119	10454	Spodoptera exigua multiple nucleopolyhedrovirus	species
1119	661101	Tomato chocolate spot virus	species
1112	1557033	Yellowstone Lake virophage 5	species
1105	10325	Macacine alphaherpesvirus 1	species
1098	306323	Streptococcus virus 2972	species
1096	1648484	Antarctic picorna-like virus 4	species
1094	414528	Chilli ringspot virus	species
1090	1105378	Porcine astrovirus 2	species
1090	1469908	Heterobasidion partitivirus 15	species
1090	568090	Flammulina velutipes browning virus	species
1086	619591	Monkeypox virus Zaire-96-I-16	no rank
1085	1933300	Watermelon silver mottle orthotospovirus	species
1083	1301279	Invertebrate iridovirus 22	species
1076	1993643	Malvastrum leaf curl deltasatellite	species
1062	1155188	Bovine rhinitis A virus	species
1047	1958777	Bat sapelovirus	species
1035	2732017	Epseptimavirus	genus
1031	1587509	Persea americana chrysovirus	species
1031	1980419	Tospoviridae	family
1022	756282	Cellulophaga phage phiST	no rank
1016	1849534	Fusarium poae virus 1-240374	no rank
1013	1476485	Andrographis yellow vein leaf curl betasatellite	species
1013	1980433	Rose rosette emaravirus	species
1012	38804	Yaba monkey tumor virus	species
1005	1922998	Hubei odonate virus 3	species
986	2065046	Torque teno midi virus 5	species
979	11102	Hepacivirus	genus
972	1529056	Penaeus monodon nudivirus	species
969	713089	Croton yellow vein mosaic alphasatellite	species
963	1491393	Jingmen tick virus	no rank
960	659497	Sclerotinia sclerotiorum partitivirus S	species
959	2099521	Nesidiocoris tenuis iflavirus 1	species
952	2547425	Tenacibaculum phage PTm1	no rank
950	12195	Potyvirus	genus
949	1307957	Clanis bilineata nucleopolyhedrovirus	species
947	1535247	Saimiriine betaherpesvirus 4	species
943	1922772	Changjiang hepe-like virus 1	species
936	1231903	Eilat virus	species
936	253700	Schlumbergera virus X	species
928	1084719	Bacillus virus G	species
928	2508069	Salmonella phage 3-29	no rank
927	2742949	Escherichia phage Lambda_ev017	species
923	2732461	Alsuviricetes	class
922	10310	Human alphaherpesvirus 2	species
922	134394	Lonomia obliqua multiple nucleopolyhedrovirus	no rank
910	1323528	Crimson clover cryptic virus 2	species
910	889873	Fathead minnow nidovirus	no rank
905	340907	Papiine alphaherpesvirus 2	species
899	273355	Anhembi virus	no rank
885	1843768	Duck faeces associated circular DNA virus 1	species
883	990303	Papio hamadryas papillomavirus 1	serotype
878	11019	Alphavirus	genus
877	55987	Salmon isavirus	species
874	32603	Human betaherpesvirus 6A	species
873	47929	Macacine betaherpesvirus 3	species
866	1511808	Alphapartitivirus	genus
862	1923486	Wenling crustacean virus 3	species
857	1806636	Rodent arterivirus	species
855	2497569	Negarnaviricota	phylum
850	1434720	Beluga whale alphaherpesvirus 1	no rank
848	1504288	Bovine gammaherpesvirus 6	species
843	59302	Ndumu virus	species
842	439015	Marine RNA virus JP-A	no rank
839	2732523	Megaviricetes	class
836	2709317	Bacteroides phage crAss002	species
830	2169782	Cardiochiles nigriceps bracovirus	species
825	10335	Human alphaherpesvirus 3	species
825	273356	Iaco virus	no rank
820	1128424	Helicoverpa zea nudivirus 2	no rank
817	2219109	Botrytis cinerea hypovirus 1 satellite-like RNA	species
816	185955	Hibiscus latent Singapore virus	species
813	1964806	Coronavirus AcCoV-JC34	species
813	2018501	Lasius neglectus virus 1	species
804	2054179	Rhinolophus gammaherpesvirus 1	species
804	261939	Ostreid herpesvirus 1	species
801	32604	Human betaherpesvirus 6B	species
798	1923478	Wenling crustacean virus 1	species
798	2283236	Aplysia californica nido-like virus	species
785	10497	African swine fever virus	species
784	999729	Leanyer virus	no rank
781	2170238	Homalodisca coagulata virus 1	species
781	50290	Aotine betaherpesvirus 1	species
777	1708572	Phopivirus	no rank
776	2575325	Salmonella phage SE13	no rank
772	1239567	Mamastrovirus 3	species
771	864596	Bat coronavirus BM48-31/BGR/2008	species
764	1283294	Longquan virus	no rank
759	1874002	Bacillus phage Stitch	no rank
757	10298	Human alphaherpesvirus 1	species
756	1857844	Pecentumvirus	genus
751	915293	Ageratum yellow vein Singapore alphasatellite	species
748	2050971	Lumpfish flavivirus	species
745	1986118	Ball python nidovirus 1	species
738	483537	Alternaria alternata virus 1	species
729	1922626	Beihai picorna-like virus 79	species
723	172862	Fowl aviadenovirus 6	serotype
721	309542	Calla lily chlorotic spot virus	no rank
719	928289	Pigeon picornavirus B	species
718	37124	Chikungunya virus	species
716	76052	Watermelon bud necrosis virus	no rank
711	187978	Peru tomato mosaic virus	species
710	212035	Acanthamoeba polyphaga mimivirus	species
708	1736634	Torulaspora delbrueckii dsRNA Mbarr-1 killer virus	species
705	1922677	Beihai sipunculid worm virus 5	species
701	1663208	Ostreococcus lucimarinus virus 2	species
700	10345	Suid alphaherpesvirus 1	species
700	163325	Capsicum chlorosis virus	no rank
699	187977	Wild potato mosaic virus	species
696	1781241	Delisea pulchra RNA virus	species
684	188938	Pronghorn antelope pestivirus	no rank
682	166056	Epinotia aporema granulovirus	species
674	10353	Saimiriine alphaherpesvirus 1	species
673	10243	Cowpox virus	species
671	2653652	Salmonella phage 1-19	no rank
668	1133728	Sclerotinia sclerotiorum mitovirus 2	species
667	10240	Poxviridae	family
666	1796992	Bacillus phage Shbh1	no rank
666	315953	Acidianus two-tailed virus	species
665	10398	Ovine gammaherpesvirus 2	species
665	83871	Chrysanthemum stem necrosis virus	no rank
664	1898060	Lymphocystis disease virus Sa	species
662	2022783	Common bottlenose dolphin gammaherpesvirus 1 strain Sarasota	species
660	11084	Tick-borne encephalitis virus	species
658	1923146	Hubei picorna-like virus 63	species
655	1685735	Lake Sarah-associated circular virus-1	species
645	376849	Lumpy skin disease virus NI-2490	no rank
638	10493	Frog virus 3	species
636	12348	Lactobacillus phage LL-H	species
634	1572704	Staphylococcus phage phiIPLA-C1C	no rank
634	218667	Oyster mushroom spherical virus	species
633	300879	Cassia yellow blotch virus	species
631	1104917	Crocuta crocuta papillomavirus 1	serotype
630	166921	Lymantria xylina nucleopolyhedrovirus	species
630	2560230	Sogarnavirus	genus
629	2014960	Linda virus	species
628	51313	Helicoverpa armigera nucleopolyhedrovirus	species
626	12327	Barley stripe mosaic virus	species
625	2547431	Lentinula edodes negative-strand RNA virus 2	no rank
621	1329402	Eptesipox virus	species
621	1940555	Murine roseolovirus	species
620	161494	Antheraea pernyi nucleopolyhedrovirus	species
619	930275	Cotia virus SPAn232	no rank
616	2843458	Sozzivirus	genus
614	112229	Pepino mosaic virus	species
614	317027	Allium virus X	species
612	1105379	Porcine astrovirus 4	species
611	1051631	Streptococcus phage YMC-2011	species
609	376852	Goatpox virus Pellor	no rank
604	1432857	Formica exsecta virus 2	species
603	687333	Gammatorquevirus	genus
602	1884879	Parrot bornavirus 5	no rank
601	10506	Paramecium bursaria Chlorella virus 1	species
597	284689	Amasya cherry disease-associated mycovirus	no rank
591	1425364	Carrot torradovirus 1	species
591	302070	Begomovirus-associated DNA-III	species
589	1923418	Shahe heteroptera virus 2	species
586	273352	Macaua virus	no rank
585	1923446	Shahe picorna-like virus 3	species
583	1803956	Parechovirus A	species
583	59304	Una virus	species
580	1298531	Sulfolobales Mexican fusellovirus 1	species
576	28288	Hyphantria cunea nucleopolyhedrovirus	species
576	405554	White bream virus	species
572	1112202	Papaya leaf curl alphasatellite	species
571	129726	Pseudocowpox virus	species
569	158372	Penicillium chrysogenum virus	species
568	1016879	Cutthroat trout virus	no rank
561	231992	Feldmannia irregularis virus a	species
559	1128151	Mimivirus terra2	species
555	1399966	pigeon mesivirus 1	no rank
553	10442	Baculoviridae	family
552	1608068	Shayang Spider Virus 1	no rank
552	2676436	Strawberry cytorhabdovirus 1	species
551	10491	Chloriridovirus	genus
548	388452	Lactococcus virus KSY1	species
548	48543	Whataroa virus	species
546	1458186	Alphasatellitidae	family
545	937809	Cordyline virus 1	species
542	748667	Grapevine Bulgarian latent virus	species
540	1933107	Escherichia phage vB_EcoP_B	no rank
540	2719593	Enterococcus phage nattely	species
539	1301280	Invertebrate iridovirus 25	species
537	722417	Campylobacter virus CP220	species
534	10242	Orthopoxvirus	genus
531	1105381	Posavirus 2	species
531	1849533	Fusarium poae partitivirus 2	species
530	10484	Campoletis sonorensis ichnovirus	species
529	307467	Euproctis pseudoconspersa nucleopolyhedrovirus	species
524	249151	Neodiprion lecontei nucleopolyhedrovirus	species
520	1902501	Rosavirus B	species
520	2259792	Linepithema humile entomopoxvirus 1	species
518	10319	Varicellovirus	genus
517	2059380	Flamingopox virus FGPVKD09	species
516	1977392	Cassava virus X	species
516	2031200	Tomato leaf curl Nepal betasatellite	species
516	28873	Camelpox virus	species
515	2881391	Campylobacter phage CP21	no rank
514	1961665	Qinghai Himalayan marmot astrovirus 1	species
511	11572	Orthobunyavirus	genus
508	2704031	Alteromonas phage vB_AmeM_PT11-V22	no rank
506	2169621	Limdunavirus	genus
505	1923770	Xinzhou nematode virus 2	species
505	382685	Lactococcus phage Q54	no rank
503	1922876	Hubei diptera virus 15	species
502	2575328	Salmonella phage SE4	species
498	356114	Hepatitis C virus genotype 3	genotype
496	2772072	crAssphage cr112_1	species
495	1032362	Clostridium phage phiCD38-2	no rank
495	1323523	Hop trefoil cryptic virus 2	species
495	55510	Staphylococcus virus Twort	species
493	257816	Cotesia glomerata bracovirus	species
492	1850906	Catopsilia pomona nucleopolyhedrovirus	species
491	1134579	Lunk virus NKS-1	no rank
491	699189	Iflaviridae	family
486	2301731	Bacteroides phage crAss001	species
485	1429794	Pectobacterium bacteriophage PM2	species
483	103881	Potato yellow vein virus	species
483	479713	Primula malacoides virus China/Mar2007	no rank
477	12058	Picornaviridae	family
475	292792	Canis familiaris papillomavirus 2	serotype
475	880159	Bathycoccus sp. RCC1105 virus BpV1	no rank
469	1414739	Vibrio phage SHOU24	species
468	1264898	Ferret coronavirus	species
465	1141625	Murine astrovirus	species
463	1041883	Big Sioux River virus	species
463	1959930	Bat sapovirus	species
462	305674	Deerpox virus W-848-83	no rank
458	467989	Imjin virus	no rank
456	1920988	Diabrotica virgifera virgifera virus 2	species
456	2315692	Marine RNA virus BC-2	no rank
455	1647391	Streptococcus phage APCM01	species
454	170617	Adoxophyes orana granulovirus	species
454	207830	Mamestra configurata nucleopolyhedrovirus A	species
453	10449	Lymantria dispar multiple nucleopolyhedrovirus	species
451	1323525	White clover cryptic virus 2	species
451	66266	Rice grassy stunt tenuivirus	species
449	1932881	Pacmanvirus A23	species
448	1346829	Peridroma alphabaculovirus	species
444	345198	Invertebrate iridescent virus 22	species
440	148363	Helicoverpa armigera nucleopolyhedrovirus G4	no rank
440	2018500	Solenopsis invicta virus 4	species
436	1150861	Canine picodicistrovirus	no rank
431	12215	Potato virus A	species
431	194960	Kobuvirus	genus
430	1922796	Changjiang picorna-like virus 7	species
430	2065033	Bombyx mori latent virus	species
428	1732201	Tadarida brasiliensis circovirus 1	no rank
428	2560160	Kochikohdavirus	genus
427	11152	Turkey coronavirus	no rank
427	2719594	Enterococus phage vipetofem	species
422	1508220	Bat coronavirus	species
421	629735	Itaporanga virus	no rank
420	627576	Bat astrovirus Tm/Guangxi/LD38/2007	no rank
419	1159195	Southern elephant seal virus	species
419	1224515	Picalivirus A	species
417	10266	Sheeppox virus	species
417	2053026	Yichang virus	species
417	233051	Hibiscus latent Fort Pierce virus	species
417	51677	Xestia c-nigrum granulovirus	species
416	1755588	Sicinivirus A	species
416	548682	Alloherpesviridae	family
412	529380	Chondrostereum purpureum cryptic virus 1	species
411	96029	Yellow head virus	species
410	44088	Canarypox virus	species
409	1623305	Skunavirus	genus
409	2052685	Citrus leprosis virus C2	species
408	1980431	Raspberry leaf blotch emaravirus	species
403	12336	Clostridium phage c-st	species
403	509923	Beet cryptic virus 1	species
402	68347	Wiseana iridescent virus	no rank
400	2219135	Alces alces faeces associated microvirus MP12 5423	species
400	644610	Nyamanini nyavirus	species
399	1926594	Enterococcus phage EFP01	no rank
397	51330	Cucurbit yellow stunting disorder virus	species
396	1493513	Synechococcus phage ACG-2014i	species
396	1857889	Silviavirus	genus
394	1249677	Heterobasidion partitivirus 8	species
393	2489628	Pectobacterium phage Koot	no rank
393	878329	Turkey adenovirus 1	serotype
391	1880590	Tenacibaculum phage pT24	no rank
389	10264	Pigeonpox virus	species
389	2029669	Lactococcus phage 62605	no rank
389	2293296	Millipede associated circular virus 1	species
388	2733127	Rosemountvirus	genus
388	43130	Onion yellow dwarf virus	species
387	307444	Erinnyis ello granulovirus	species
384	310907	Enterovirus H	species
384	485724	Melon severe mosaic tospovirus	species
383	694013	Gammacoronavirus	genus
382	10621	Human papillomavirus 9	serotype
382	341112	Ranunculus mosaic virus	species
380	1048855	Odrenisrou virus	no rank
379	630199	Grapevine Syrah virus 1	species
378	1923755	Wuhan spider virus 6	species
378	2732005	Bamfordvirae	kingdom
376	1959287	Reed chlorotic stripe virus	species
376	1980429	Pigeonpea sterility mosaic emaravirus 1	species
375	1648482	Antarctic picorna-like virus 2	species
375	2065055	Torque teno midi virus 14	species
375	341111	Ranunculus mild mosaic virus	species
373	1124849	Pseudomonas phage OBP	species
372	10265	Capripoxvirus	genus
369	40281	Cryphonectria hypovirus 1	species
366	2840056	Naldaviricetes	class
365	1980631	Bipolaris maydis partitivirus 1	species
363	347219	Citrus leprosis virus C	species
362	10372	Human betaherpesvirus 7	species
362	2501368	Thottimvirus	genus
359	1678179	Diatom colony associated ssRNA virus 1	species
359	1685953	Macrosiphum euphorbiae virus 1	species
359	190729	Betasatellite	genus
358	2560419	Enterococcus virus EF24C	species
353	1074428	Mouse Mosavirus	no rank
350	1412875	Lactococcus phage phiL47	no rank
349	1452540	Felis catus gammaherpesvirus 1	no rank
346	1648481	Antarctic picorna-like virus 1	species
346	35252	Alcelaphine gammaherpesvirus 1	species
344	1000646	Echarate virus	no rank
344	1732063	Staphylococcus phage SPbeta-like	species
344	246343	Turkey astrovirus 2	no rank
344	2478919	Orthopoxvirus Abatino	no rank
342	1923717	Wuhan insect virus 13	species
341	1923743	Wuhan nido-like virus 1	species
340	1511853	Alphanudivirus	genus
338	1895333	Sulfolobus islandicus rudivirus 3	species
338	1965063	DeBrazza's monkey arterivirus	no rank
337	10359	Human betaherpesvirus 5	species
336	2843351	Audreyjarvisvirus	genus
332	2301728	Bellinger River virus	no rank
331	322019	Acanthocystis turfacea chlorella virus 1	species
330	1629551	Groundnut chlorotic fan-spot virus	no rank
328	2083176	Oxyplax ochracea nucleopolyhedrovirus	species
328	2773290	rabbit kobuvirus	no rank
328	662596	Radish leaf curl betasatellite	species
325	1450746	Pithovirus sibericum	species
323	1465751	Anopheles minimus iridovirus	species
323	1923618	Wenzhou picorna-like virus 32	species
322	1312872	Mesoniviridae	family
322	1547495	Salivirus FHB	species
322	2162642	Rhizoctonia solani endornavirus 1	species
320	380598	Paramecium bursaria Chlorella virus AR158	species
319	48200	Narcissus latent virus	species
317	390157	Senecavirus A	species
316	1961914	Pectobacterium phage PPWS4	no rank
313	1958785	Bat badicivirus 1	species
312	384848	Corynebacterium phage P1201	no rank
311	74660	Choristoneura fumiferana DEF multiple nucleopolyhedrovirus	species
310	1780507	Myotis gammaherpesvirus 8	species
309	1911439	Corey virus	species
307	1685744	Lake Sarah-associated circular virus-18	species
307	39725	Circovirus	genus
306	1965467	Lactococcus phage AM1	no rank
306	537009	Stygiolobus rod-shaped virus	no rank
304	694015	Beluga whale coronavirus SW1	species
304	936059	Tursiops truncatus papillomavirus 1	serotype
303	1715290	Canary bornavirus 2	no rank
302	1923489	Wenling crustacean virus 6	species
301	627585	Bat astrovirus Tm/Guangxi/LD77/2007	no rank
300	1093928	Porcine astrovirus 5	species
300	1857843	Kayvirus	genus
300	1922353	Beihai astro-like virus	species
298	10294	Simplexvirus	genus
297	1486469	Mycobacterium phage Damien	species
296	2315721	Spodoptera eridania nucleopolyhedrovirus	species
295	10260	Avipoxvirus	genus
295	12332	Rice hoja blanca tenuivirus	species
295	12465	Barley yellow mosaic virus	species
295	12851	Tomato chlorotic spot virus	no rank
294	1922997	Hubei odonate virus 2	species
294	2732406	Kitrinoviricota	phylum
293	32620	Iris severe mosaic virus	species
292	2740803	uncultured phage_MedDCM-OCT-S38-C3	no rank
291	542343	Adoxophyes orana nucleopolyhedrovirus	species
290	1513278	Hibiscus green spot virus 2	species
286	2601626	Klebsiella phage Soft	no rank
286	307997	Tradescantia mild mosaic virus	species
283	1261657	Murid betaherpesvirus 8	species
283	1923253	Hubei tick virus 2	species
281	1557035	Yellowstone Lake virophage 7	species
281	44421	Lychnis ringspot virus	species
279	10276	Swinepox virus	species
279	1592335	Pseudoplusia includens SNPV IE	no rank
279	1922595	Beihai picorna-like virus 50	species
276	1497848	Papaya meleira virus	species
276	56947	Choristoneura fumiferana granulovirus	species
275	1965068	Simian hemorrhagic encephalitis virus	no rank
273	10256	Raccoonpox virus	species
273	523909	Musca domestica salivary gland hypertrophy virus	no rank
272	1469905	Heterobasidion partitivirus 12	species
272	1903266	Cedratvirus A11	species
272	1912759	Equus caballus papillomavirus 8	serotype
272	2292426	Blackcurrant leafroll-associated virus 1	species
272	96491	Gill-associated virus	species
271	2040662	Tomato yellow leaf curl Shandong betasatellite	species
271	389214	Ranid herpesvirus 2	species
268	1074213	Mouse kobuvirus M-5/USA/2010	species
268	188141	Spring beauty latent virus	species
267	39420	Feldmannia species virus	species
267	429130	Alternanthera mild mosaic virus	species
266	1922391	Beihai hermit crab virus 4	no rank
266	292278	Marituba virus	no rank
265	1389204	Feline astrovirus 2	species
265	1592576	Condylorrhiza vestigialis MNPV	species
264	2052742	Yersinia phage fHe-Yen9-04	no rank
264	588752	Begonia flower breaking virus	species
258	2338396	Grapevine associated tymo-like virus	species
256	2660760	Actinidia emaravirus 2	species
256	692606	Cyprinivirus	genus
256	979535	Vibrio phage ICP3	no rank
255	1955197	Biratnagar virus	species
255	2065051	Torque teno midi virus 10	species
255	674983	Pleurotus ostreatus virus 1	species
254	271108	Bombyx mori nucleopolyhedrovirus	species
253	1074210	Mouse astrovirus M-52/USA/2008	species
253	1903318	Primate norovirus	species
253	35243	Ateline alphaherpesvirus 1	species
252	1074325	Sclerotinia sclerotiorum hypovirus 1	species
252	1173764	Listeria phage LP-048	no rank
252	332054	Trichoplusia ni single nucleopolyhedrovirus	species
251	2508244	Pregotovirus	genus
251	2560327	Avian paraavulavirus 3	species
251	2772074	crAssphage cr85_1	species
250	2772061	crAssphage cr107_1	species
249	36344	Chelonus inanitus bracovirus	species
248	1510155	Falconid herpesvirus 1	no rank
248	2763102	Enterococcus phage 9183	species
247	2772095	crAssphage cr273_1	species
247	336486	Turkeypox virus	species
246	693996	Alphacoronavirus	genus
244	1170424	Negev virus	species
244	1204543	Staphylococcus virus SA11	species
244	1923706	Wuhan house centipede virus 2	species
242	640897	Phytophthora infestans RNA virus 1	species
241	471728	Seal picornavirus type 1	no rank
241	63746	Hepatitis C virus (isolate H77)	no rank
239	1340769	Staphylococcus phage phiIBB-SEP1	no rank
239	445217	Erinaceus europaeus papillomavirus 1	serotype
238	2094260	Bee Macula-Like virus 2	species
238	434309	Saffold virus	no rank
238	46618	Rhizoctonia solani virus 717	species
237	1642929	Lambdina fiscellaria nucleopolyhedrovirus	species
237	648998	Penguinpox virus	species
237	942041	Heterobasidion partitivirus 1	species
236	693999	Scotophilus bat coronavirus 512	species
234	260479	Cotton leaf curl Multan virus satellite U36-1	species
233	240426	Squirrelpox virus	species
232	28344	Porcine reproductive and respiratory syndrome virus	species
231	1582151	Clostridium phage phiCD146	no rank
231	1906245	Moku virus	species
230	1922716	Beihai tombus-like virus 13	species
230	1933295	Iris yellow spot orthotospovirus	species
229	2003651	Cosavirus E	species
227	1495316	Soybean cyst nematode virus 5	species
227	1582152	Clostridium phage phiCD211	species
227	1913112	Aeribacillus phage AP45	no rank
226	1432847	Oenococcus phage phiS11	no rank
226	45455	Macacine gammaherpesvirus 4	species
225	1608255	Suid betaherpesvirus 2	species
224	1685740	Lake Sarah-associated circular virus-14	species
224	362830	Artogeia rapae granulovirus	species
223	10455	Spodoptera frugiperda multiple nucleopolyhedrovirus	species
223	1406134	Murrumbidgee virus	species
223	187217	Tunavirus	genus
223	1923701	Wuhan heteroptera virus 1	species
223	333764	Human papillomavirus type 34	serotype
223	929051	Tomato leaf curl Togo betasatellite-[Togo:2006]	species
222	2772071	crAssphage cr111_1	species
221	1072333	Lygus lineolaris virus 1	species
221	1636618	Fletchervirus	genus
221	340187	Acyrthosiphon pisum virus	species
221	682370	Streptococcus virus ALQ132	species
220	39740	Bromoviridae	family
218	2530024	Fusobacterium phage Fnu1	no rank
217	1323524	Red clover cryptic virus 2	species
217	2569586	Canada goose coronavirus	species
216	1680908	Salmon gill poxvirus	no rank
216	1826170	Tokyovirus A1	species
215	10744	Podoviridae	family
215	1482734	Duck aalivirus 1	no rank
215	70134	Watermelon leaf mottle virus	species
214	1234171	Sauropus leaf curl disease associated DNA beta	species
212	2843416	Leicestervirus	genus
211	2847087	GB virus-B	no rank
210	135246	Trocara virus	species
209	81583	Himetobi P virus	species
208	675845	Emaravirus	genus
207	1815969	Mycobacterium phage Loser	species
207	37108	Meleagrid alphaherpesvirus 1	species
206	907191	Raspberry latent virus	species
205	458132	Slow bee paralysis virus	species
204	1980928	Sepunavirus	genus
204	2294149	Passiflora edulis symptomless virus	species
204	331278	Yersinia phage phiR1-37	species
203	1105380	Posavirus 1	species
203	2772067	crAssphage cr11_1	species
202	1511809	Betapartitivirus	genus
202	1654889	Salmonella phage 36	no rank
202	68876	Kashmir bee virus	species
202	990550	Campylobacter virus CP81	species
201	2843109	Usarudivirus	genus
201	347327	Pseudomonas phage PA11	no rank
200	12301	Broad bean mottle virus	species
199	447605	Lindernia anagallis yellow vein virus satellite DNA beta	species
195	2489618	Pectobacterium phage Clickz	no rank
195	36363	Lymphocystis disease virus 1	species
194	2010327	Tobacco leaf curl Patna betasatellite	species
194	50294	Psittacid alphaherpesvirus 1	species
193	1147094	Klebsiella phage vB_KleM_RaK2	no rank
193	1659219	Kobuvirus cattle/Kagoshima-2-24-KoV/2015/JPN	species
192	1519999	Staphylococcus phage phiBU01	no rank
192	2507711	Escherichia phage vB_EcoS_IME542	no rank
191	1608084	Tacheng Tick Virus 2	no rank
191	1636617	Firehammervirus	genus
191	330396	Listeria phage B025	species
188	2591120	Gordonia phage Tangerine	species
188	69973	Closteroviridae	family
187	35287	Rice tungro spherical virus	species
185	1572712	Geobacillus virus E3	species
185	1923130	Hubei picorna-like virus 49	species
185	2303488	Zegla virus	no rank
183	100217	Epizootic haematopoietic necrosis virus	species
183	2219092	Sclerotinia sclerotiorum deltaflexivirus 2	species
183	90410	Streptococcus virus DT1	species
182	11764	Baboon endogenous virus strain M7	no rank
182	207656	Bacillus phage phiNIT1	no rank
182	78219	Mamestra brassicae multiple nucleopolyhedrovirus	species
181	1516128	Chaetoceros tenuissimus RNA virus type-II	species
180	10376	Human gammaherpesvirus 4	species
180	10381	Saimiriine gammaherpesvirus 2	species
180	206377	Buenaventura virus	no rank
179	101850	Thysanoplusia orichalcea nucleopolyhedrovirus	species
179	1980428	High Plains wheat mosaic emaravirus	species
179	2025823	Salmonella phage SG1	no rank
179	2035708	Cherax quadricarinatus iridovirus	species
179	687379	Torque teno midi virus 1	species
178	2489627	Pectobacterium phage Khlen	no rank
178	2560086	Alcyoneusvirus	genus
177	1538101	Small begomovirus-associated satellite	species
176	1922664	Beihai sesarmid crab virus 4	no rank
176	2201424	Erwinia phage vB_EamM_Alexandra	no rank
175	10261	Fowlpox virus	species
175	1440170	Madariaga virus	species
174	2164103	Apple rubbery wood virus 2	no rank
174	59749	Maize rayado fino virus	species
173	1690666	Bombyx mori iflavirus	species
172	1428189	Hedyotis yellow mosaic betasatellite	species
171	1414655	Pepper chlorotic spot virus	no rank
171	1945560	Alphamesonivirus 2	species
171	1986290	Clostera anastomosis granulovirus B	species
171	205908	Cypovirus 14	species
171	558690	Cucurbit chlorotic yellows virus	species
170	170325	Canid alphaherpesvirus 1	species
170	73422	Streptococcus phage TP-J34	species
170	92444	Acute bee paralysis virus	species
169	411248	Croton yellow vein mosaic betasatellite	species
169	98383	Plutella xylostella granulovirus	species
168	1567025	Salmonella phage vB_SPuM_SP116	no rank
168	2601527	Ovine adenovirus 8	no rank
167	1629132	Graminella nigrifrons virus 1	species
167	1792245	Bacillus phage Deep Blue	no rank
167	1902502	Rosavirus C	species
167	2732969	Baoshanvirus	genus
166	1521392	McMurdo Ice Shelf pond-associated circular DNA virus-8	species
166	167129	Moroccan watermelon mosaic virus	species
166	181084	Prasinovirus	genus
166	2419618	Bacillus phage vB_BboS-125	no rank
165	1853762	Jasmine virus C	species
165	2219110	Botrytis cinerea hypovirus 1 satellite-like RNA-S	species
164	47900	Garlic common latent virus	species
163	1579460	Parapoxvirus red deer/HL953	no rank
162	1268383	Rosavirus M-7	no rank
162	1421067	Tunisvirus fontaine2	no rank
161	213034	Sclerotinia sclerotiorum debilitation-associated RNA virus	species
161	2508184	Nitrosopumilus spindle-shaped virus	species
160	2560132	Fipvunavirus	genus
158	1922934	Hubei myriapoda virus 5	no rank
158	2259540	Mustela putorius papillomavirus 1	serotype
157	1511784	Pasivirus A1	no rank
157	1758139	Colombian potato soil-borne virus	species
156	1498168	Enterococcus phage ECP3	no rank
156	186764	Fromanvirus	genus
156	2005054	Pasteurella phage vB_PmuP_PHB02	no rank
155	2560111	Ceetrepovirus	genus
154	1871631	Rhizoctonia solani flexivirus 1	species
154	2025595	Abisko virus	species
153	1923564	Wenzhou gastropodes virus 2	species
153	354260	Lactococcus phage P335 sensu lato	species
153	508441	Ictalurid herpesvirus 2	species
153	51354	Maize chlorotic dwarf virus	species
153	629730	Cacao virus	no rank
152	1211386	Pectobacterium phage PhiM1	no rank
152	157898	Sulfolobus islandicus rod-shaped virus 1	no rank
152	46015	Autographa californica nucleopolyhedrovirus	no rank
151	12331	Rice stripe tenuivirus	species
151	157899	Sulfolobus islandicus rod-shaped virus 2	no rank
151	1955558	Noumeavirus	species
151	2039780	Shrimp hemocyte iridescent virus	no rank
151	444860	Synechococcus phage S-SM2	species
151	572290	Thrush coronavirus HKU12-600	species
151	674971	Aurantiochytrium single-stranded RNA virus 01	species
150	1813599	Brazilian marseillevirus	species
150	1980413	Hantaviridae	family
150	2116736	Chrysanthemum virus R	species
148	1920989	Diabrotica virgifera virgifera virus 3	species
148	2772076	crAssphage cr128_1	species
147	2250309	Mycobacterium phage Steamy	species
146	36355	Pseudalatia unipuncta granulovirus	no rank
145	1720526	Golden Marseillevirus	species
145	198612	Groundnut bud necrosis virus	no rank
145	558017	Betabaculovirus	genus
144	1195087	Sunshine Coast virus	no rank
144	157897	Rudiviridae	family
144	2024264	Agrobacterium phage Atu_ph07	no rank
144	2509616	Homarus gammarus nudivirus	species
144	273810	Eriocheir sinensis reovirus	species
144	32629	Indian peanut clump virus	species
144	33773	Olive latent virus 2	species
144	722418	Campylobacter virus CPt10	species
143	2419797	Brassica napus RNA virus 1	species
142	108098	Human mastadenovirus B	species
142	1219896	Raccoon polyomavirus	no rank
142	192584	Phthorimaea operculella granulovirus	species
142	2010332	Tomato leaf curl Laguna betasatellite	species
142	59305	Bebaru virus	species
141	2170408	Apodemus flavicollis polyomavirus 1	species
140	1382295	Inachis io cypovirus 2	no rank
140	1917990	Bequatrovirus	genus
140	2164102	Apple rubbery wood virus 1	no rank
139	2562175	Salmonella phage ZCSE2	no rank
138	1247115	Diuris virus A	species
138	1273738	Escherichia phage PBECO4	no rank
138	137475	Cucumber vein yellowing virus	species
138	1555202	Escherichia phage 121Q	no rank
138	186815	Heterobasidion annosum P-type partitivirus	no rank
138	1904876	Human DNA virus	species
137	1003177	Vibrio phage qdvp001	species
137	1434319	Staphylococcus phage vB_SepS_SEP9	no rank
137	1849328	Enterovirus goat/JL14	species
137	2575255	Lactococcus phage CHPC971	no rank
136	1500386	Staphylococcus phage 6ec	no rank
136	2560801	Testudinid alphaherpesvirus 3	species
136	999883	Lausannevirus	species
135	129951	Human mastadenovirus C	species
135	1923281	Hubei tombus-like virus 33	species
134	1578826	torchivirus A1	no rank
134	1675866	Urbanus proteus nucleopolyhedrovirus	species
134	1705092	Ageratum conyzoides symptomless alphasatellite	species
134	1923760	Xingshan nematode virus 1	species
134	436007	Angelica virus Y	species
132	2170142	Chaetoceros protobacilladnavirus 3	species
131	1736759	Chayote yellow mosaic Benin betasatellite	no rank
131	1922925	Hubei mosquito virus 1	species
131	85618	Ateline gammaherpesvirus 3	species
130	1980527	Qalyub orthonairovirus	species
129	10385	Bovine gammaherpesvirus 4	species
129	180252	Mardivirus	genus
129	1918522	Lightbulbvirus	genus
129	1922632	Beihai picorna-like virus 84	species
129	1926969	Bivalve RNA virus G3	species
129	943083	California sea lion adenovirus 1	serotype
128	1541119	Dinocampus coccinellae paralysis virus	species
128	1698439	Acinetobacter phage phiAB6	no rank
128	2419970	Arthrobacter phage Yang	no rank
128	28289	Cydia pomonella granulovirus	species
127	1983550	Sulfolobus islandicus rod-shaped virus 7	species
127	766791	Mink coronavirus strain WD1127	no rank
126	1821545	Enseada virus	no rank
126	40062	Warrego virus	species
126	638660	Short-finned eel ranavirus	species
125	1159903	Magpie-robin coronavirus HKU18	species
124	2079134	Dishui lake phycodnavirus 1	species
124	2772077	crAssphage cr127_1	species
123	1508224	Lucheng Rn rat coronavirus	species
123	1868660	uncultured Mediterranean phage	species
123	2517967	Mycobacterium phage Refuge	species
122	1881383	Vibrio phage 1.097.O._10N.286.49.B3	no rank
122	2065203	Proteus phage phiP4-3	species
121	10386	Gallid alphaherpesvirus 1	species
121	1211417	uncultured crAssphage	species
121	1922327	Wphvirus	genus
121	236807	Iranian wheat stripe tenuivirus	species
121	686983	Avian sapelovirus	species
120	1159901	Deltacoronavirus	genus
120	1679239	Zucchini shoestring virus	species
120	2732968	Schiekvirus	genus
120	37296	Human gammaherpesvirus 8	species
119	1141136	Cronobacter phage vB_CsaM_GAP32	no rank
119	1859492	Kaumoebavirus	species
119	1923138	Hubei picorna-like virus 56	species
119	2772070	crAssphage cr110_1	species
118	2016400	Morelia viridis nidovirus	no rank
118	224399	Adoxophyes honmai nucleopolyhedrovirus	species
118	2731691	Drexlerviridae	family
118	328614	Heliothis virescens ascovirus 3f	no rank
118	38420	Simian adenovirus 3	serotype
117	1527519	Escherichia phage Av-05	no rank
117	1868844	Staphylococcus phage vB_SscM-1	no rank
117	2010315	Chili leaf curl Sri Lanka betasatellite	species
117	932662	Mud crab virus	species
116	1923772	Xinzhou nematode virus 4	no rank
116	1983553	Erwinia phage vB_EamM_Y3	no rank
116	2065050	Torque teno midi virus 9	species
116	764562	Brochothrix phage BL3	species
115	2801477	Flavobacterium phage vB_FspM_immuto_2-6A	species
114	2010272	Culex mononega-like virus 2	species
114	2016454	Ailuropoda melanoleuca papillomavirus 1	serotype
113	10271	Rabbit fibroma virus	species
113	1308863	Bacillus phage vB_BanS-Tsamsa	species
113	1647475	Gordonia phage GTE8	species
113	2100419	Planarian secretory cell nidovirus	no rank
113	2772068	crAssphage cr8_1	species
112	1406785	Bacillus phage Grass	no rank
112	2697049	Severe acute respiratory syndrome coronavirus 2	no rank
111	104392	Rhopalanthe virus Y	species
111	1399941	Lactobacillus phage phiJB	species
111	1591444	Thaumetopoea pityocampa iflavirus 1	species
111	373996	Micromonas pusilla virus SP1	species
110	1508228	Wencheng Sm shrew coronavirus	species
110	1921009	Arachis pintoi virus	species
110	2502409	Escherichia phage vB_EcoM_Goslar	no rank
109	1540090	Bacillus phage Mater	no rank
109	1746065	Tacheng tick virus 8	species
109	187218	Tequintavirus	genus
109	2772062	crAssphage cr106_1	species
109	82676	Omikronpapillomavirus 1	species
108	1262512	Staphylococcus phage Team1	no rank
108	2530140	Mycobacterium phage Pharaoh	species
108	889813	Colobus guereza papillomavirus 2	serotype
107	160796	Skunkpox virus	species
107	221054	Eupatorium yellow vein betasatellite	species
107	2588520	Aeromonas phage 4L372XY	no rank
107	2772063	crAssphage cr118_1	species
106	10492	Ranavirus	genus
106	2560244	Tulanevirus	genus
106	2560770	Sorex coronatus polyomavirus 1	species
106	298338	Lactobacillus virus LP65	species
105	1936269	Helicoverpa armigera iflavirus	species
105	1955196	Big Cypress virus	species
105	2079433	Lactobacillus phage Semele	no rank
105	445692	Cyanophage NATL2A-133	no rank
105	694006	Rousettus bat coronavirus HKU9	species
104	1513458	Marseillevirus	genus
104	566270	Spodoptera litura nucleopolyhedrovirus II	species
103	268746	Prochlorococcus phage P-SSM2	no rank
102	1837876	Acinetobacter phage vB_AbaM_ME3	no rank
102	1923260	Hubei tombus-like virus 14	species
102	2733124	Phapecoctavirus	genus
102	2772059	crAssphage cr50_1	species
102	303317	Rabbit vesivirus	species
102	646413	Streptococcus phage 5093	species
102	755272	Micromonas pusilla virus 12T	species
102	941058	Bacillus phage SP-10	species
101	1567453	Lactobacillus phage LfeSau	species
101	2109373	Chicken stool associated circular virus 1	species
101	2576500	Escherichia phage vB_EcoS-12210I	no rank
101	2660715	Vibrio phage Valm-yong1	no rank
100	1746059	Gamboa mosquito virus	species
100	2320195	Pectobacterium phage Lelidair	no rank
100	300186	Acidianus filamentous virus 2	species
99	1873959	Pectobacterium phage PP90	no rank
99	1945850	Ash gourd yellow vein mosaic alphasatellite	species
99	40272	Roseolovirus	genus
98	12118	Foot-and-mouth disease virus - type O	no rank
98	1582150	Clostridium phage phiCD111	no rank
98	2093224	Pistachio ampelovirus A	species
98	573174	Vibrio phage henriette 12B8	species
97	208973	Choristoneura fumiferana multiple nucleopolyhedrovirus	species
97	445686	Synechococcus phage S-SSM7	species
96	1123964	Sulfolobus virus STSV2	species
96	1159907	White-eye coronavirus HKU16	species
96	1623285	Corndogvirus	genus
95	1285382	Bacillus phage SIOphi	no rank
95	1327990	Cellulophaga phage phi14:2	species
95	154122	Mink calicivirus	species
94	11118	Coronaviridae	family
94	1161132	Rabbit astrovirus TN/2208/2010	species
94	1332248	Karang Sari virus	no rank
94	2017081	Human fecal virus Jorvi2	species
94	2025359	Murmansk poxvirus	no rank
94	2032989	Rosellinia necatrix hypovirus 1	species
94	543939	Sputnik virophage	no rank
94	694007	Tylonycteris bat coronavirus HKU4	species
93	1187894	Clostridium phage PhiS63	species
93	1887650	Gordonia phage Jumbo	no rank
93	190064	Fowl aviadenovirus D	species
93	1962671	Serratia phage BF	no rank
92	1623273	Triavirus	genus
92	1647454	Salmonella phage SE24	no rank
92	1920866	Rogunavirus	genus
92	1960255	Cacao swollen shoot CD virus	species
92	2772511	Pectinobacterium phage vB_PcaM_CBB	no rank
92	35310	Bwamba orthobunyavirus	species
92	765765	Colwellia phage 9A	no rank
91	1608075	Shuangao Insect Virus 1	no rank
91	2034762	Sweet potato pakakuy virus	species
91	341110	Ranunculus leaf distortion virus	species
91	76803	Arteriviridae	family
90	1150991	Sphingomonas phage PAU	species
90	164416	Wesselsbron virus	species
90	1788435	Bat mastadenovirus WIV13	serotype
90	1982243	Incheonvrus	genus
90	204507	Neodiprion abietis NPV	species
90	326202	Vanilla distortion mosaic virus	species
88	1654926	Escherichia phage HY03	no rank
88	1873698	Pteropox virus	species
88	2743994	Mycobacterium phage Gail	species
88	319522	Gordonia phage GTE5	species
87	12305	Cucumber mosaic virus	species
87	2116488	Wenling thamnaconus septentrionalis filovirus	no rank
87	2170000	Deer mastadenovirus B	species
87	2758131	bat polyomavirus 2a	no rank
87	70600	Epiphyas postvittana nucleopolyhedrovirus	species
86	10683	Bacillus virus PBS1	species
86	1137745	Cyanophage S-TIM5	no rank
86	1435411	Oenococcus phage phi9805	no rank
86	1592093	Sewage-associated circular DNA virus-26	species
86	172296	Bovine parvovirus - 2	no rank
86	2283013	Bacillus phage BSP38	no rank
86	2560145	Hanrivervirus	genus
86	2686250	Flavobacterium phage vB_FspS_laban6-1	no rank
86	297254	Lactobacillus virus LLKu	species
86	548687	Macavirus	genus
85	1502101	Sclerotinia sclerotiorum debilitation-associated RNA virus 2	species
85	159147	Mermet virus	no rank
85	1914165	Dhakavirus	genus
85	2029664	Lactococcus phage 51701	no rank
84	1542477	Prochlorococcus phage P-TIM68	species
84	1980416	Peribunyaviridae	family
84	2005509	Centapoxvirus	genus
83	1398507	Felis catus papillomavirus 4	serotype
83	1922988	Hubei noda-like virus 8	species
83	2025819	Salmonella phage SH9	no rank
82	11584	Phlebovirus	genus
82	12329	Tenuivirus	genus
82	1961666	Qinghai Himalayan marmot astrovirus 2	species
82	2052651	Vombatid gammaherpesvirus 1	species
82	2842711	Gregsiragusavirus	genus
82	348449	Raphanus sativus cryptic virus 1	species
82	575918	Tomato leaf curl Patna betasatellite	species
81	1041929	Cavally virus	no rank
81	1691958	Brevibacillus phage Sundance	species
81	1916701	Trichoplusia ni granulovirus LBIV-12	no rank
81	2169995	Ryukyu mammarenavirus	species
80	1815522	Synechococcus phage S-WAM2	no rank
80	186532	Ceduovirus	genus
80	1911929	Caeruleovirus	genus
80	2169536	Kuttervirus	genus
80	2304025	Cryptophlebia peltastica nucleopolyhedrovirus	species
80	260797	Heliothis virescens ascovirus 3e	no rank
79	1323529	Dill cryptic virus 2	species
79	1605972	Cricetid gammaherpesvirus 2	species
79	2315392	Trichoderma harzianum bipartite mycovirus 1	no rank
79	2593638	Bacillus phage vB_BmeM-Goe8	no rank
79	2772078	crAssphage cr271_1	species
79	393767	Bat coronavirus 1A	no rank
78	1160968	Rabbit coronavirus HKU14	species
78	11780	Snyder-Theilen feline sarcoma virus	species
78	1198140	Felixounavirus	genus
78	1586715	Yellowstone lake phycodnavirus 3	species
78	1983582	Pectobacterium phage vB_PatP_CB5	no rank
78	2546621	Enterococcus phage vB_EfaP_Ef6.2	no rank
78	2842609	Claudivirus	genus
78	66797	Bacillus virus SPbeta	species
77	1675598	Bacillus phage Pavlov	species
77	167634	Grapevine rootstock stem lesion associated virus	species
77	244589	Sulfolobus spindle-shaped virus 1	species
77	2733156	Getalongvirus	genus
77	2772092	crAssphage cr130_1	species
77	2842979	Pseudotevenvirus	genus
77	345201	Invertebrate iridescent virus 3	species
77	370833	Tomato torrado virus	species
77	427315	Tomato yellow dwarf disease associated satellite DNA beta-[Kochi]	species
76	1129145	Pseudomonas phage phi297	species
76	12302	Brome mosaic virus	species
76	2560777	Spheniscid alphaherpesvirus 1	species
76	2842752	Icerudivirus	genus
75	1327970	Cellulophaga phage phi19:1	species
75	1414742	Arthrobacter phage vB_ArS-ArV2	species
75	1843764	Bovine faeces associated circular DNA virus 1	species
75	1852628	Morganella phage vB_MmoM_MP1	species
75	2592615	Vibrio phage USC-1	no rank
75	381899	Paramecium bursaria Chlorella virus A1	species
74	1283076	Pelagibacter phage HTVC008M	species
74	1589747	Achromobacter phage 83-24	no rank
74	1922815	Changjiang tombus-like virus 21	species
74	294631	Flavobacterium phage 11b	species
73	1048207	Escherichia phage phiEB49	no rank
73	1049283	Acinetobacter phage ZZ1	no rank
73	2023996	Synechococcus phage Bellamy	no rank
73	2686303	Acinetobacter phage vB_AbaM_Kimel	no rank
72	1452516	Caprine kobuvirus	species
72	32615	Puma lentivirus 14	no rank
72	431317	Triticum mosaic virus	species
72	879096	Hepatitis E virus rat/R63/DEU/2009	no rank
71	2560202	Phimunavirus	genus
71	584892	Bacillus phage Bcp1	no rank
71	764595	Bacillus phage W.Ph.	no rank
70	10331	Equid alphaherpesvirus 4	species
70	1239582	Mamastrovirus 18	species
70	1623308	Wbetavirus	genus
70	2010268	Aedes camptorhynchus negev-like virus	species
70	249588	Mamastrovirus	genus
70	59241	Streptococcus phage Dp-1	species
70	871700	Oscivirus A1	no rank
69	1242863	Spodoptera exempta nucleopolyhedrovirus	species
69	1432848	Oenococcus phage phiS13	no rank
69	1821228	Staphylococcus phage SLPW	no rank
69	185750	Ageratum yellow vein betasatellite	species
69	1913653	Gelderlandvirus	genus
69	2072024	Mocis latipes granulovirus	species
69	225725	Bacillus phage phBC6A51	species
69	2797417	Staphylococcus phage LSA2366	species
69	768738	Elephant endotheliotropic herpesvirus 5	species
69	864178	Clostridium phage phiCD6356	species
68	1327983	Cellulophaga phage phi18:3	species
68	1408137	Mobuck virus	species
68	1526408	Staphylococcus phage P108	no rank
68	1541821	Listeria phage WIL-1	no rank
68	1608440	Chimeric virus 14	species
68	204440	Mamestra configurata nucleopolyhedrovirus B	species
68	2871198	Acipenserid herpesvirus 2	species
68	396359	Clostridium phage phiSM101	species
68	436242	Pepper leaf curl virus satellite DNA beta	species
67	1977144	Vespertiliovirus	genus
67	2283031	Dickeya phage vB_DsoM_JA29	no rank
67	2500815	Lactococcus phage 20R03M	no rank
67	74581	Rat parvovirus 1	no rank
66	1090134	Salmonella phage SPN3US	no rank
66	1608095	Wenzhou Shrimp Virus 1	no rank
66	1918010	Bastillevirus	genus
66	2006930	Pasteurella phage PHB01	no rank
66	2025809	Proteus phage PM2	species
66	2070057	Vibrio phage Aphrodite1	no rank
66	2732970	Harbinvirus	genus
66	2733139	Vellamovirus	genus
66	436243	Tomato leaf curl Joydebpur betasatellite	species
65	1170425	Piura virus	species
65	1557034	Yellowstone Lake virophage 6	species
65	1560514	Melbournevirus	species
65	188763	Panine betaherpesvirus 2	species
65	1923371	Sanxia picorna-like virus 2	species
65	2175118	Symphysodon discus adomavirus 1	species
65	2480623	Salmonella phage STG2	no rank
64	1416741	Sea otter poxvirus	no rank
64	1923406	Sanxia water strider virus 7	species
64	2733140	Wellingtonvirus	genus
64	2772065	crAssphage cr3_1	species
64	2772084	crAssphage cr4_1	species
64	2772085	crAssphage cr6_1	species
64	64003	Grapevine leafroll-associated virus 2	species
63	11777	Feline sarcoma virus (STRAIN HARDY-ZUCKERMAN 4)	no rank
63	1204178	Helicobacter phage KHP40	no rank
63	12730	Human respirovirus 1	species
63	1464786	Laodelphax striatella honeydew virus 1	species
63	1604355	Escherichia phage ECBP2	no rank
63	1923629	Wenzhou picorna-like virus 42	species
63	2306727	Areca palm necrotic ringspot virus	species
63	2479372	Ying Kou virus	species
63	345922	Bacillus phage Fah	species
63	687380	Torque teno midi virus 2	species
63	762660	Acinetobacter phage Ac42	species
63	80341	Equid alphaherpesvirus 3	species
63	880161	Micromonas sp. RCC1109 virus MpV1	species
62	10702	Streptomyces phage VWB	species
62	1195072	Bacillus phage vB_BceM_Bc431v3	no rank
62	12303	Cowpea chlorotic mottle virus	species
62	1563660	Sucra jujuba nucleopolyhedrovirus	species
62	1776293	Bacillus phage Eldridge	no rank
62	2842588	Ceceduovirus	genus
62	2843436	Plateaulakevirus	genus
62	573172	Vibrio phage eugene 12A10	species
62	632112	Lactobacillus virus Lb338-1	species
61	1026955	Synechococcus phage S-CRM01	species
61	1046267	Operophtera brumata nucleopolyhedrovirus	species
61	1272953	Oita virus	no rank
61	1406783	Bacillus phage CampHawk	no rank
61	2025360	NY_014 poxvirus	species
61	262175	Plodia interpunctella granulovirus	species
61	285013	Sulfolobus virus STSV1	species
61	926066	Clostridium phage CpV1	no rank
60	10464	Agrotis segetum granulovirus	species
60	1305708	Clostridium phage vB_CpeS-CP51	species
60	137443	Macropodid alphaherpesvirus 1	species
60	1590836	Maprik virus	no rank
60	2010325	Rhynchosia yellow mosaic betasatellite	species
60	2014604	Dromedary camel bocaparvovirus 2	no rank
60	2283029	Dickeya phage vB_DsoM_AD1	no rank
60	372457	Streptococcus phage M102	species
60	871584	Clostridium phage phiCTP1	species
59	1239383	Staphylococcus phage JD007	no rank
59	1629656	Simian torque teno virus 33	species
59	172861	Fowl aviadenovirus 5	no rank
59	2077304	Leptonychotes weddellii papillomavirus 3	species
59	2596677	Escherichia phage Henu8	no rank
58	1685748	Lake Sarah-associated circular virus-21	species
58	169683	Pseudomonas virus phiKZ	species
58	1923457	Shahe yuevirus-like virus 1	no rank
58	1923754	Wuhan spider virus 5	species
58	2772080	crAssphage cr53_1	species
58	33745	Hepatitis C virus genotype 4	genotype
58	445700	Prochlorococcus phage P-HM1	species
58	635076	Ageratum leaf curl Cameroon betasatellite	species
57	1225795	Lactobacillus phage ATCC 8014-B2	no rank
57	1445809	Bacillus phage vB_BtS_BMBtp3	no rank
57	1450749	IAS virus	species
57	1540091	Bacillus phage Moonbeam	no rank
57	1784982	Pseudomonas phage O4	species
57	2041210	Lactobacillus phage LpeD	no rank
56	1204535	Clostridium phage phiMMP04	no rank
56	1391456	Phormidium phage MIS-PhV1B	species
56	1580591	Sulfolobus monocaudavirus SMV2	species
56	1983572	Synechococcus phage S-H35	species
56	2025352	Wild vitis virus 1	no rank
56	2048879	Tomato leaf curl Virudhunagar alphasatellite	species
56	262968	Singapore grouper iridovirus	species
56	2772094	crAssphage cr272_1	species
56	410826	Potato apical leaf curl disease-associated satellite DNA beta	species
56	680115	Phikzvirus	genus
56	713092	Cotton leaf curl Burewala betasatellite	species
56	930168	Sweet potato collusive virus	species
55	11089	Yellow fever virus	species
55	111469	Retroperitoneal fibromatosis-associated herpesvirus	no rank
55	1168744	Listeria phage vB_LmoM_AG20	no rank
55	1176156	Tomato leaf curl Yemen betasatellite	species
55	1424280	Sierra Nevada virus	no rank
55	1567484	Lactobacillus phage LfeInf	no rank
55	238854	Synechococcus phage S-PM2	no rank
55	2686437	Vibrio phage vB_VchM_Kuja	no rank
55	2772088	crAssphage cr114_1	species
55	989895	Passion fruit green spot virus	species
54	1204516	Aeromonas phage CC2	no rank
54	1465639	Podovirus Lau218	species
54	1815509	Bacillus phage AR9	species
54	1985325	Jiaodavirus	genus
54	300740	Mint virus 1	species
54	694581	Marseillevirus marseillevirus	species
53	1173766	Listeria phage LP-125	no rank
53	1246651	Heliothis virescens ascovirus 3g	no rank
53	1262518	Leuconostoc phage LN25	no rank
53	1922937	Hubei myriapoda virus 8	no rank
53	2041517	Mycobacterium phage Anselm	species
53	2163901	Synechococcus phage S-B64	species
53	218845	Tobacco leaf curl Yunnan betasatellite	species
53	2201444	Microbacterium phage Zeta1847	no rank
53	2267403	Vibrio phage YC	no rank
53	881953	Lactococcus phage 949	no rank
52	12109	Aphthovirus	genus
52	1892416	Rousettus bat coronavirus	no rank
52	1922243	Sextaecvirus	genus
52	2029670	Lactococcus phage 63302	no rank
52	2042482	Eastern grey kangaroopox virus	no rank
52	2047782	Escherichia phage PGT2	no rank
52	2382310	Dickeya phage vB_DsoM_JA11	no rank
52	2560245	Unahavirus	genus
52	489830	Helicoverpa armigera granulovirus	species
51	1131315	Erwinia phage PEp14	species
51	115992	Vibrio phage nt-1	no rank
51	148943	Rhodothermus phage RM378	species
51	1518575	Human astrovirus BF34	no rank
51	1560346	Simian adenovirus DM-2014	serotype
51	1587907	Streptococcus phage M102AD	species
51	1920526	Azobacteroides phage ProJPt-Bp1	species
51	1983545	Sulfolobus islandicus rod-shaped virus 10	no rank
51	2025338	Sus scrofa papillomavirus 2	species
51	2048061	Escherichia phage DTL	no rank
51	2057942	Pleurochrysis carterae circular virus	species
51	268747	Prochlorococcus phage P-SSM4	no rank
51	680287	Rosenblumvirus	genus
50	1283077	Pelagibacter phage HTVC010P	species
50	1290581	Chaetoceros setoense DNA virus	no rank
50	1458852	Listeria phage LP-030-3	species
50	1922654	Beihai rhabdo-like virus 4	no rank
50	2016455	Ailuropoda melanoleuca papillomavirus 2	serotype
50	2099567	Ti ringspot-associated emaravirus	species
50	2772091	crAssphage cr125_1	species
50	670251	Leucas zeylanica yellow vein virus satellite DNA beta	species
50	696069	Bat adenovirus 2	serotype
49	10533	Human adenovirus 1	serotype
49	111874	Neodiprion sertifer nucleopolyhedrovirus	species
49	1368616	Brazoran virus	no rank
49	1587517	Black grass cryptic virus 2	species
49	1590650	Adelie penguin polyomavirus	no rank
49	1623278	Bronvirus	genus
49	1698369	Lactococcus phage GE1	no rank
49	1891704	Sophora japonica powdery mildew-associated partitivirus	species
49	1932931	Maverick-related virus strain Spezl	no rank
49	1985178	Bacillus virus BM15	species
49	2170082	Pestivirus C	species
49	2268578	Synechococcus phage S-T4	no rank
49	2712958	Proteus phage Privateer	no rank
49	754042	Synechococcus phage S-SKS1	no rank
48	11788	Abelson murine leukemia virus	species
48	1297646	Corchorus yellow vein mosaic betasatellite	species
48	1965482	Lactococcus phage LW81	no rank
48	205323	Tobacco leaf curl betasatellite	species
48	2173168	Tomato leaf curl Philippine betasatellite	species
48	260149	Aeromonas virus 65	species
48	2662295	Lactococcus phage P1048	no rank
48	2731690	Demerecviridae	family
48	2772073	crAssphage cr116_1	species
48	555387	Synechococcus phage S-RSM4	species
48	76804	Nidovirales	order
47	104388	Anatid alphaherpesvirus 1	species
47	1296662	Brevibacillus phage Davies	no rank
47	1406816	Zucchini tigre mosaic virus	species
47	1458711	Mycobacterium phage Hawkeye	no rank
47	153135	Gammaretrovirus	genus
47	1567011	Clostridium phage phiCT19406C	species
47	1633187	Laibin virus	no rank
47	185218	African oil palm ringspot virus	species
47	1883366	Synechococcus phage S-CAM3	no rank
47	1941435	Amphibola crenata associated bacilladnavirus 1	no rank
47	2024315	Shigella phage Sf12	no rank
47	2056384	Varroa destructor virus 2	species
47	2169622	Unaquatrovirus	genus
47	2315766	Enterococcus phage EfV12-phi1	no rank
47	2743801	Flavobacterium phage vB_FspP_elemoD_13-5B	species
47	447606	Alternanthera yellow vein betasatellite	species
46	10617	Human papillomavirus 4	serotype
46	1150353	Gentian Kobu-sho-associated virus	species
46	130309	Human mastadenovirus F	species
46	1472912	Nitrincola phage 1M3-16	species
46	1623281	Cheoctovirus	genus
46	1631303	Mulberry mosaic dwarf associated virus	species
46	1766767	Alternaria brassicicola fusarivirus 1	species
46	1918005	Bacillus virus B4	species
46	1933063	Bacillus phage vB_BsuM-Goe3	no rank
46	2041345	Pseudomonas phage SL2	no rank
46	2733128	Saclayvirus	genus
46	512792	Acidianus filamentous virus 9	species
46	642478	Lettuce chlorosis virus	species
45	129950	Bovine mastadenovirus B	species
45	1772319	Arthrobacter phage Tank	no rank
45	1987509	Ranid herpesvirus 3	species
45	223769	Grapevine Anatolian ringspot virus	species
45	2696393	Escherichia phage egaa	no rank
45	536474	Synechococcus phage Syn30	no rank
45	938277	Tomato leaf curl Ranchi betasatellite	species
44	134606	Trichoplusia ni cypovirus 15	no rank
44	1690456	Bacillus phage TsarBomba	no rank
44	1698360	Klebsiella phage JD18	no rank
44	180170	Infectious spleen and kidney necrosis virus	species
44	190061	Fowl aviadenovirus A	species
44	1958956	Erwinia phage vB_EamM_Yoloswag	no rank
44	1987479	Choristoneura murinana nucleopolyhedrovirus	species
44	2052851	Sambucus virus S	species
44	2065047	Torque teno midi virus 6	species
44	2065053	Torque teno midi virus 12	species
44	2169709	Psittacine aviadenovirus B	species
44	64294	Yokose virus	species
44	930881	Sweet potato virus C	species
43	1293961	Sida yellow vein China alphasatellite	species
43	1493509	Synechococcus phage ACG-2014d	species
43	1883369	Synechococcus phage S-CAM9	no rank
43	1927017	Xanthomonas phage KPhi1	species
43	1933294	Impatiens necrotic spot orthotospovirus	species
43	2065049	Torque teno midi virus 8	species
43	2315470	Bacillus phage vB_BthP-Goe4	no rank
43	232799	Iflavirus	genus
43	2484640	Synechococcus phage S-P4	no rank
43	2510942	Lactobacillus phage 521B	no rank
43	2772090	crAssphage cr124_1	species
43	316106	Bitter gourd leaf curl betasatellite	no rank
43	35246	Cercopithecine alphaherpesvirus 9	species
43	694001	Miniopterus bat coronavirus HKU8	species
43	885379	Tomato leaf curl Bangladesh betasatellite	species
42	1147044	Staphylococcus phage StB27	species
42	1161939	Enterococcus phage vB_Efae230P-4	no rank
42	11663	Ovine lentivirus	species
42	1173297	Halocynthia phage JM-2012	species
42	11855	Mason-Pfizer monkey virus	species
42	12228	Tobacco vein mottling virus	species
42	1335638	Phaeocystis globosa virus virophage	species
42	1471299	Grapevine Roditis leaf discoloration-associated virus	species
42	1498212	Bacillus phage JBP901	no rank
42	1685747	Lake Sarah-associated circular virus-20	species
42	1718158	Enterococcus phage IME-EFm5	species
42	1746060	Sanxia water strider virus 6	species
42	1916647	Burke-Gilman virus	species
42	2099336	Anoxybacillus phage A403	no rank
42	2843455	Sherbrookevirus	genus
42	292029	Staphylococcus virus G1	species
42	39729	Potyviridae	family
42	537874	Streptococcus phage PH15	species
41	10814	Begomovirus	genus
41	1457165	Wallerfield virus	species
41	1476886	Lactococcus phage P078	no rank
41	1846168	Lactobacillus phage P1	no rank
41	2065048	Torque teno midi virus 7	species
41	2499242	Caaingua virus	species
41	2772066	crAssphage cr10_1	species
41	455649	Spiroplasma virus SkV1CR23x	species
41	536466	Synechococcus phage S-SSM4	species
41	642260	Circovirus-like genome BBC-A	species
41	664255	Anthurium mosaic-associated virus	no rank
41	754039	Synechococcus phage S-IOM18	no rank
40	12417	Lactobacillus phage phiadh	species
40	1460071	Antheraea pernyi iflavirus	species
40	1589270	Streptococcus phage Str-PAP-1	species
40	1815955	Lactococcus phage PLgT-1	species
40	1887314	Ranavirus maximus	no rank
40	2508071	Pantoea phage vB_PagM_LIET2	no rank
40	2733117	Neptunevirus	genus
40	2741075	uncultured phage_MedDCM-OCT-S35-C6	no rank
40	2772075	crAssphage cr126_1	species
40	2843444	Ravarandavirus	genus
40	35238	Mycoplasma virus P1	species
40	382359	Synechococcus phage syn9	species
40	55096	Ippy mammarenavirus	species
40	633135	Streptococcus virus phiAbc2	species
40	871699	Passerivirus A1	no rank
39	1231334	Tomato leaf curl Hajipur betasatellite	species
39	1357714	Caulobacter phage Cr30	species
39	1439894	Klebsiella phage K64-1	no rank
39	1590370	Betacoronavirus HKU24	no rank
39	1605379	Acinetobacter phage vB_AbaM_phiAbaA1	species
39	1609290	Tomato leaf curl Pakistan betasatellite	species
39	1640885	Enterococcus phage EFLK1	no rank
39	1775963	Jasmine virus T	species
39	1921704	Tegunavirus	genus
39	196400	Grapevine rupestris stem pitting-associated virus	species
39	2034827	cardiovirus C1	no rank
39	2060124	Salmonella phage BPS17W1	no rank
39	2560124	Efquatrovirus	genus
39	2710495	Bacteroides phage DAC15	species
39	2733136	Thaumasvirus	genus
39	39046	Cassava common mosaic virus	species
39	629737	Turuna virus	no rank
39	694008	Pipistrellus bat coronavirus HKU5	species
39	754038	Synechococcus phage S-CAM8	species
39	912035	Ageratum leaf curl Buea betasatellite	species
38	1110702	Campylobacter virus CPX	species
38	1340812	Synechococcus phage S-MbCM100	no rank
38	1462608	Pseudomonas phage KPP25	no rank
38	1481186	Acinetobacter phage vB_AbaM_Acibel004	species
38	1673887	Citrobacter phage IME-CF2	no rank
38	1697349	Scale drop disease virus	species
38	1698711	Mycobacterium phage Lolly9	species
38	1716044	Lymphocryptovirus Macaca/pfe-lcl-E3	no rank
38	1788309	Sclerotinia sclerotiorum deltaflexivirus 1	no rank
38	1912144	Lubbockvirus	genus
38	273350	Wyeomyia orthobunyavirus	species
38	45764	Mycobacterium phage DS6A	no rank
38	760530	Staphylococcus phage G15	no rank
37	10245	Vaccinia virus	species
37	123630	Macaca nemestrina rhadinovirus 2	no rank
37	1296661	Brevibacillus phage Abouo	no rank
37	1411887	Zamilon virus	no rank
37	1922895	Hubei hepe-like virus 2	species
37	2082658	Gigaspora margarita giardia-like virus 1	species
37	2601256	Tomato leaf curl Anand alphasatellite	species
37	2843105	Tybeckvirus	genus
36	10571	Bovine papillomavirus	species
36	1074865	Bat picornavirus 3	species
36	130371	Porcine mastadenovirus C	species
36	139872	Lactobacillus prophage Lj928	species
36	1567014	Clostridium phage phiCT9441A	species
36	1648483	Antarctic picorna-like virus 3	species
36	1863010	Shigella phage SHSML-45	no rank
36	1931371	Biomphalaria virus 3	species
36	2584487	Vibrio phage VAP7	no rank
36	2772093	crAssphage cr131_1	species
36	559189	Clostridium virus phiCD27	species
36	680114	Bixzunavirus	genus
36	760732	Acinetobacter phage Acj61	no rank
35	1204533	Bacillus phage phiAGATE	no rank
35	1262539	Vibrio phage VH7D	species
35	1283078	Pelagibacter phage HTVC011P	no rank
35	1450142	Staphylococcus phage phiSA12	no rank
35	154334	Macacine gammaherpesvirus 5	species
35	1586713	Yellowstone lake phycodnavirus 1	species
35	1636250	Proteus phage vB_PmiM_Pm5461	species
35	1673874	Staphylococcus phage IME-SA119	no rank
35	1922585	Beihai picorna-like virus 41	species
35	1922651	Beihai rhabdo-like virus 1	no rank
35	1931113	Pea leaf distortion betasatellite	species
35	2010317	Ageratum yellow vein Sri Lanka betasatellite	species
35	2182341	Microbacterium phage Hendrix	no rank
35	2560310	Avian metaavulavirus 11	species
35	2608321	Aeromonas phage vB_AhyS-A18P4	species
35	280702	Mycoplasma phage phiMFV1	species
35	536453	Prochlorococcus phage P-SSM3	no rank
35	754037	Synechococcus phage S-CAM1	no rank
35	758677	Raspberry vein chlorosis virus	no rank
34	1129192	Bacillus phage BCP8-2	no rank
34	1229752	Campylobacter phage CP30A	no rank
34	1411095	Clostridium phage CDMH1	no rank
34	1493510	Synechococcus phage ACG-2014e	species
34	1520006	Duck adenovirus 2	serotype
34	1586714	Yellowstone lake phycodnavirus 2	species
34	1662272	Dromedary astrovirus	species
34	168238	Porcine endogenous retrovirus E	no rank
34	1732177	Sulfolobus monocaudavirus SMV3	species
34	1746069	Wuhan centipede virus	species
34	1913651	Krischvirus	genus
34	1918721	Siminovitchvirus	genus
34	1986506	Bat mastadenovirus WIV18	serotype
34	200401	Hart Park virus	no rank
34	2169670	Betatectivirus	genus
34	219596	Tobacco curly shoot betasatellite	species
34	2419804	Salvia divinorum RNA virus 1	species
34	2736192	Shigella virus 2019SD1	species
34	2772087	crAssphage cr113_1	species
34	35265	Porcine adenovirus 3	serotype
34	37128	Potato mop-top virus	species
34	382273	Prochlorococcus phage P-SSP3	no rank
33	11884	Y73 sarcoma virus	species
33	1204537	Caulobacter virus phiCbK	species
33	1281456	Bat picornavirus	no rank
33	1343901	Fruit bat alphaherpesvirus 1	no rank
33	1623688	Bat polyomavirus 6c	no rank
33	1755697	Lactobacillus phage SA-C12	no rank
33	1797140	Acidianus tailed spindle virus	species
33	1868826	Bacillus phage vB_BtS_BMBtp14	no rank
33	1883365	Synechococcus phage S-CAM22	species
33	1912760	Cequinquevirus	genus
33	1920860	Webervirus	genus
33	1921016	Nitunavirus	genus
33	1922903	Hubei lepidoptera virus 1	no rank
33	1923679	Wenzhou tombus-like virus 9	species
33	2219106	Botrytis cinerea fusarivirus 1	species
33	2283269	Caulobacter phage CcrBL10	no rank
33	2696375	Escherichia phage aalborv	no rank
33	2733155	Shapirovirus	genus
33	2843431	Nylescharonvirus	genus
33	40523	Listeria virus A511	species
33	754064	Ostreococcus lucimarinus virus OlV5	species
33	759701	Bettongia penicillata papillomavirus 1	serotype
32	10379	Rhadinovirus	genus
32	1343494	Stenotrophomonas phage SMA7	no rank
32	151534	Lactococcus phage bIL311	species
32	1873985	Salmonella phage IME207	species
32	1904491	Campylobacter phage vB_CjeM_Los1	no rank
32	1938577	Vibrio phage pTD1	no rank
32	1982227	Steinhofvirus	genus
32	2010326	Tobacco leaf curl Japan betasatellite	species
32	2077307	Leptonychotes weddellii papillomavirus 6	species
32	2126734	Staphylococcus phage phiSA_BS1	no rank
32	2315716	Streptomyces phage Darolandstone	no rank
32	2696340	Enterobacter phage vB_EclM_CIP9	no rank
32	2772086	crAssphage cr7_1	species
32	2772089	crAssphage cr115_1	species
32	2843392	Hubeivirus	genus
32	573173	Vibrio phage helene 12B3	species
32	674982	Ceratocystis resinifera virus 1	species
32	745088	Leuconostoc phage 1-A4	no rank
32	889956	Prochlorococcus phage MED4-213	no rank
31	10509	Mastadenovirus	genus
31	1074863	Bat picornavirus 1	species
31	1079998	Synechococcus phage ACG-2014c	species
31	1159906	Sparrow coronavirus HKU17	species
31	11665	Equine infectious anemia virus	species
31	1206557	Yersinia phage phiR2-01	no rank
31	12181	Papaya mosaic virus	species
31	1327977	Cellulophaga phage phi38:1	species
31	1385427	Betacoronavirus Erinaceus/VMC/DEU/2012	no rank
31	1406784	Bacillus virus Glittering	species
31	1481112	Serratia phage PS2	no rank
31	1610832	Bacillus phage Stahl	no rank
31	1610833	Bacillus phage Stills	no rank
31	1610855	Vibrio phage ValKK3	no rank
31	1732064	Staphylococcus phage StB20-like	species
31	1759525	Bacillus phage vB_BceS-MY192	no rank
31	1883368	Synechococcus phage S-CAM7	no rank
31	1922583	Beihai picorna-like virus 4	species
31	1923407	Sanxia water strider virus 8	species
31	1983556	Pseudomonas phage PspYZU05	species
31	2049444	Gammapapillomavirus sp.	species
31	2053682	Lactobacillus phage Lenus	no rank
31	2169618	Clecrusatellite	genus
31	2682569	Chrysothrix chrysovirus 1	species
31	2733162	Maenadvirus	genus
31	2777318	Bacillus phage DLc1	species
31	458639	Bacillus phage 0305phi8-36	species
31	754075	Vibrio phage 11895-B1	species
30	1327985	Cellulophaga phage phi46:3	species
30	1481465	Tomato necrotic dwarf virus	species
30	1524910	Staphylococcus phage MCE-2014	no rank
30	1572703	Staphylococcus phage phiIPLA-RODI	no rank
30	1610837	Enterobacteria phage JenP1	no rank
30	1675554	Mycobacterium phage Pops	no rank
30	1923703	Wuhan heteroptera virus 3	species
30	1986505	Bat mastadenovirus WIV17	serotype
30	2079432	Lactobacillus phage Nyseid	no rank
30	221036	Malvastrum yellow vein betasatellite	species
30	2315597	Proteus phage Stubb	no rank
30	2447921	Veterinary Pathology Zurich virus 1	no rank
30	2510943	Lactobacillus phage 3-521	no rank
30	2675255	Lactococcus phage CHPC959	no rank
30	272551	Macaca fuscata rhadinovirus	no rank
30	2741077	uncultured phage_MedDCM-OCT-S28-C10	no rank
30	346883	Acidianus filamentous virus 7	species
30	578234	Lactobacillus phage Lv-1	species
30	756280	Cellulophaga phage phiSM	species
30	762906	Hyperthermophilic Archaeal Virus 2	species
30	994672	Titi monkey adenovirus ECC-2011	serotype
29	1335230	Pseudomonas phage PaBG	no rank
29	1391188	Bacillus phage CP-51	no rank
29	1489714	Tanay virus	species
29	153057	Alpharetrovirus	genus
29	1566307	Western grey kangaroopox virus	no rank
29	1567012	Clostridium phage phiCT453A	species
29	1572750	Mannheimia phage vB_MhM_3927AP2	species
29	1597976	Enterococcus phage EFDG1	no rank
29	1623685	Bat polyomavirus 6a	no rank
29	1732175	Acidianus rod-shaped virus 2	no rank
29	1871692	Enterococcus phage SANTOR1	no rank
29	1883370	Erwinia phage vB_EamM_Asesino	no rank
29	190478	Clostridium phage phi3626	species
29	1923104	Hubei picorna-like virus 24	species
29	1983547	Sulfolobus islandicus rod-shaped virus 4	no rank
29	1985303	Mooglevirus	genus
29	1985328	Slopekvirus	genus
29	2560131	Ficleduovirus	genus
29	2734128	Edwardsiella virus pEtSU	species
29	2842820	Lazarusvirus	genus
29	2843445	Rockefellervirus	genus
28	1127515	Bdellovibrio phage phi1422	species
28	1278479	Cyanophage S-RIM32	species
28	1285600	Nile crocodilepox virus	species
28	1391026	Faeces associated gemycircularvirus 11	no rank
28	1493512	Synechococcus phage ACG-2014g	species
28	1654919	Pseudoalteromonas phage H101	no rank
28	169687	Ageratum yellow leaf curl betasatellite	species
28	1883374	Erwinia phage vB_EamM_Kwan	species
28	1921709	Slashvirus	genus
28	1923340	Hubei virga-like virus 7	species
28	2053705	Lactococcus phage vB_Llc_bIBB5g1	no rank
28	2065052	Torque teno midi virus 11	species
28	2169824	Cleome leaf crumple alphasatellite	species
28	2364646	Macaca mulatta papillomavirus 6	species
28	2565501	Bacillus phage vB_BtS_B83	no rank
28	2588518	Aeromonas phage 4L372D	no rank
28	2741074	uncultured phage_MedDCM-OCT-S46-C10	no rank
28	2843426	Muminvirus	genus
28	369762	Henbane mosaic virus	species
28	407392	Thermus phage phiYS40	species
28	418827	Yambean mosaic virus	species
28	437444	Acidianus bottle-shaped virus	no rank
28	536444	Cyanophage P-RSM1	species
27	112436	Celery mosaic virus	species
27	1154995	Helicobacter phage 1961P	no rank
27	12274	Grapevine fanleaf virus	species
27	1327972	Cellulophaga phage phi17:2	no rank
27	1406780	Acinetobacter phage Presley	no rank
27	1495866	Cat Que virus	no rank
27	1527515	Idiomarinaceae phage Phi1M2-2	species
27	158683	Diadromus pulchellus ascovirus 4a	no rank
27	1881236	Vibrio phage 1.245.O._10N.261.54.C7	species
27	194445	Mirabilis mosaic virus	species
27	2047871	Corynebacterium phage Zion	no rank
27	2182354	Microbacterium phage Hyperion	no rank
27	2483612	Salmonella phage Seafire	no rank
27	2653651	Xanthomonas virus phiXaf18	species
27	268591	Anticarsia gemmatalis multiple nucleopolyhedrovirus	species
27	2732068	Warwickvirus	genus
27	2772079	crAssphage cr52_1	species
27	324901	Marnaviridae	family
27	432370	Wood mouse herpesvirus	no rank
27	438782	Abaca bunchy top virus	species
27	444876	Cyanophage P-SSP2	no rank
27	445688	Prochlorococcus phage P-SSM7	no rank
27	445696	Prochlorococcus phage P-HM2	species
27	461322	Ursus maritimus papillomavirus 1	serotype
27	93224	Spiroplasma phage SVTS2	no rank
27	936152	Riemerella phage RAP44	species
26	10552	Aviadenovirus	genus
26	10748	Streptococcus phage CP-7	no rank
26	1128118	Parrot hepatitis B virus	species
26	1159902	Common moorhen coronavirus HKU21	species
26	11807	Harvey murine sarcoma virus	species
26	1204539	Pectobacterium phage My1	no rank
26	1272947	Landjia virus	no rank
26	130499	Bovine atadenovirus D	species
26	1486428	Enterococcus phage EFC-1	species
26	1588764	Gemycircularvirus SL1	no rank
26	1675606	Escherichia phage Murica	no rank
26	1714377	Bottlenose dolphin adenovirus 1	serotype
26	1815631	Salmonella phage vB_SnwM_CGG4-1	species
26	185959	Spiroplasma phage C74	no rank
26	2004966	Rhinolophus associated gemykibivirus 2	no rank
26	2012640	Lesser panda anellovirus	no rank
26	202566	Cherry rasp leaf virus	species
26	205880	Mycobacterium phage Barnyard	no rank
26	2065054	Torque teno midi virus 13	species
26	2070028	Klebsiella phage vB_Kpn_F48	no rank
26	2108116	Xanthomonas phage RiverRider	no rank
26	2170143	Chaetoceros protobacilladnavirus 4	species
26	2175605	Clostridium phage CPS2	no rank
26	2249313	Phascolarctid gammaherpesvirus 1	species
26	2686278	Flavobacterium phage vB_FspS_tant8-1	no rank
26	2741073	uncultured phage_MedDCM-OCT-S42-C7	no rank
26	2741076	uncultured phage_MedDCM-OCT-S30-C28	no rank
26	2772081	crAssphage cr56_1	species
26	663237	Bacillus phage Wip1	no rank
26	78522	Odocoileus adenovirus 1	serotype
25	1157338	Canine astrovirus	species
25	1206110	Lactobacillus phage phiAQ113	species
25	1245909	Sulfolobales Mexican rudivirus 1	species
25	1327993	Cellulophaga phage phi39:1	species
25	1486422	Listeria phage List-36	no rank
25	1589733	Cyanophage P-TIM40	no rank
25	1608145	Yongjia Tick Virus 1	no rank
25	1682186	Bee Macula-like virus	species
25	1792032	Bacillus phage SP-15	no rank
25	1837830	Bacillus phage SalinJah	species
25	1871716	Klebsiella phage KNP2	no rank
25	1913652	Mosigvirus	genus
25	1914852	Vequintavirus	genus
25	1923622	Wenzhou picorna-like virus 36	species
25	2023998	Pseudoalteromonas phage J2-1	no rank
25	2048008	Proteus phage PM135	no rank
25	206392	Iris mild mosaic virus	species
25	2070201	Lactobacillus phage Satyr	no rank
25	2169843	Sida leaf curl alphasatellite	species
25	217615	Grapevine leafroll-associated virus 7	species
25	2267607	Lactobacillus phage ViSo-2018a	no rank
25	2493123	Sulfolobales Beppu filamentous virus 2	no rank
25	2596884	Salmonella phage OSY-STA	no rank
25	2699738	Cronobacter phage vB_CsaP_009	no rank
25	2758977	bovine rhinitis B virus 1	no rank
25	433357	Bidens mottle virus	species
25	650121	Heterocapsa circularisquama DNA virus 01	species
25	75590	Mycoplasma phage MAV1	species
25	998086	Pseudomonas phage PhiPA3	species
24	1123958	Chimpanzee adenovirus Y25	serotype
24	1141135	Cronobacter phage vB_CsaM_GAP31	no rank
24	1161927	Pseudomonas phage Lu11	species
24	1198980	Pbunavirus	genus
24	12136	Cricket paralysis virus	species
24	12205	Papaya ringspot virus	species
24	12300	Bromovirus	genus
24	1567026	Escherichia phage vb_EcoM-VR5	no rank
24	1637527	Dromedary camel enterovirus 19CC	no rank
24	1841147	Bhindi yellow vein alphasatellite	species
24	1849335	Arabidopsis halleri partitivirus 1	species
24	1972684	Balsa almendravirus	species
24	1984776	Agricanvirus	genus
24	2108205	Nephila clavipes virus 2	species
24	2163891	Enterobacteria phage vB_EcoM_IME341	species
24	2316154	Clostridium phage susfortuna	no rank
24	234829	Tomato begomovirus satellite DNA beta	species
24	2480195	Ecklonia radiata-associated virus 5	species
24	2772083	crAssphage cr109_1	species
24	290028	Human coronavirus HKU1	species
24	315392	Tomato leaf curl virus-Pune-associated DNA beta	species
24	373398	Basella rugose mosaic virus	species
24	444859	Synechococcus phage S-SM1	no rank
24	445684	Synechococcus phage Syn19	no rank
24	551895	Iodobacter phage PhiPLPE	no rank
24	699370	Thermus phage TMA	species
24	760939	Acinetobacter phage Acj9	no rank
24	912321	Leuconostoc phage phiMH1	no rank
23	1036255	Papaya leaf curl betasatellite-Panipat 6 [India:Panipat:Papaya:2008]	no rank
23	1126885	Thermoanaerobacterium phage THSA-485A	species
23	1127516	Pectobacterium phage ZF40	species
23	1141137	Cronobacter phage vB_CsaP_GAP52	species
23	114430	Ovine adenovirus 7	no rank
23	1211643	Caulobacter virus Rogue	species
23	1309583	Bacillus phage MG-B1	no rank
23	1406779	Acinetobacter phage Petty	no rank
23	1406792	Bacillus phage Staley	no rank
23	1454028	Dragonfly larvae associated circular virus-7	species
23	1475143	Mink circovirus	species
23	1582155	Clostridium phage phiCD506	no rank
23	159145	Ingwavuma virus	no rank
23	162145	Human metapneumovirus	species
23	1623298	Phietavirus	genus
23	1822365	Bovine retrovirus CH15	species
23	1925779	Nankokuvirus	genus
23	2026080	Erwinia phage vB_EamM_RisingSun	no rank
23	2058161	tremovirus B1	no rank
23	2116385	Hainan hebius popei torovirus	species
23	2163633	Erwinia phage Cronus	species
23	2169633	Buttersvirus	genus
23	2575610	Mycobacterium phage Antsirabe	species
23	2592195	Salmonella phage SE11	no rank
23	268748	Prochlorococcus virus PSSP7	species
23	345030	Groundnut yellow spot virus	no rank
23	382262	Prochlorococcus phage P-GSP1	no rank
23	392505	Mastomys coucha papillomavirus 2	serotype
23	754058	Vibrio phage PWH3a-P1	species
23	869662	Synechococcus phage S-RIM2 R1_1999	no rank
23	880162	Ostreococcus lucimarinus virus 1	species
23	91741	Porcine lymphotropic herpesvirus 2	no rank
23	926067	Aeromonas phage PX29	species
23	942016	Enterobacter phage EcP1	no rank
22	10854	Spiroplasma phage R8A2B	no rank
22	1093773	Mirabilis jalapa mottle virus	species
22	1150989	Vibrio phage pVp-1	no rank
22	11819	Spleen focus-forming virus	species
22	1328030	Cellulophaga phage phi13:2	species
22	1452514	Sosuga virus	no rank
22	1486660	Bacillus phage Hoody T	no rank
22	1552735	Lactobacillus phage Ldl1	no rank
22	1623274	Biseptimavirus	genus
22	1685783	Lake Sarah-associated circular virus-6	species
22	1788434	Bat mastadenovirus WIV12	serotype
22	1857890	Staphylococcus virus Remus	species
22	1909400	Bacillus phage QCM11	no rank
22	1922527	Beihai picorna-like virus 1	species
22	1922902	Hubei leech virus 4	species
22	1923144	Hubei picorna-like virus 61	species
22	1923150	Hubei picorna-like virus 67	species
22	1965363	Yersinia phage fHe-Yen9-01	species
22	1985182	Bacillus virus BCP78	species
22	2050589	Vernonia yellow vein Fujian betasatellite	species
22	2053701	Aeromonas phage Ah1	species
22	2517212	Porcine serum associated circular DNA virus 2	species
22	2733284	Arepavirus	genus
22	2756144	Bacillus phage Baseball_field	species
22	2843411	Lahexavirus	genus
22	38062	Cassava vein mosaic virus	species
22	39720	Walleye dermal sarcoma virus	species
22	570832	Ludwigia leaf distortion betasatellite [India:Amadalavalasa:Hibiscus:2007]	no rank
22	660955	Nova virus	no rank
22	687803	Cyanophage S-RIM50	no rank
22	85154	Streptococcus virus O1205	species
22	932699	Bahia Grande virus	no rank
21	1124578	Bacillus phage phIS3501	no rank
21	11673	Feline immunodeficiency virus	species
21	1229757	Escherichia phage EC6	no rank
21	1283079	Pelagibacter phage HTVC019P	no rank
21	1406791	Bacillus phage Spock	no rank
21	1486658	Bacillus phage Evoli	no rank
21	1527469	Bacillus phage Bobb	no rank
21	1567013	Clostridium phage phiCT453B	species
21	1610831	Staphylococcus phage IME-SA2	no rank
21	1746074	Xinzhou spider virus 3	species
21	1785753	Ostreococcus tauri virus OtV5	species
21	179237	Sinorhizobium phage PBC5	species
21	1814960	Streptococcus virus 9874	species
21	1897437	Rhodococcus phage Weasels2	no rank
21	1913650	Karamvirus	genus
21	198540	Streptococcus phage 315.3	species
21	2050019	Shrew coronavirus	species
21	2083276	Escherichia phage EcS1	species
21	2283265	Streptomyces phage StarPlatinum	no rank
21	2301662	Acinetobacter phage KARL-1	no rank
21	236750	Bacillus phage Bam35c	no rank
21	2587809	Klebsiella phage Marfa	no rank
21	265294	Ambystoma tigrinum virus	species
21	2731621	Taipeivirus	genus
21	2734085	Synechococcus virus AC2014fSyn7803C8	species
21	2734123	Synechococcus virus ACG2014bSyn7803C61	species
21	2842888	Mydovirus	genus
21	35290	Beet yellow stunt virus	species
21	445683	Synechococcus phage S-ShM2	no rank
21	491893	Abalone shriveling syndrome-associated virus	species
21	515575	Algerian watermelon mosaic virus	species
21	640136	Emilia yellow vein virus-associated DNA beta	species
21	994601	Planktothrix phage PaV-LD	species
20	1004049	Spissistilus festinus reovirus	species
20	10334	Felid alphaherpesvirus 1	species
20	10747	Streptococcus phage Cp1	no rank
20	1136534	Bacillus phage BCD7	no rank
20	1141140	Escherichia phage vB_EcoS_ACG-M12	no rank
20	1204529	Salmonella phage SSE121	no rank
20	1285589	Bombyx mori bidensovirus	species
20	129875	Human mastadenovirus A	species
20	1327971	Cellulophaga phage phi19:3	species
20	1327974	Cellulophaga phage phi46:1	species
20	1406790	Bacillus phage Slash	no rank
20	1418029	Siegesbeckia yellow vein betasatellite	species
20	1439369	Carp picornavirus 1	no rank
20	1445860	Salmonella phage STP4-a	no rank
20	1486419	Listeria phage LMTA-94	no rank
20	1506184	Sida yellow vein alphasatellite	species
20	1560342	Acinetobacter phage YMC13/03/R2096	species
20	1588049	Tadarida brasiliensis polyomavirus 2	species
20	1608047	Huangpi Tick Virus 1	no rank
[truncated: 5,119 more rows]

## Sheet: Kraken2
reads	taxID	taxName	rank
1156233	67082	BeAn 58058 virus	species
285923	10239	Viruses	superkingdom
118550	166122	Human endogenous retrovirus K113	no rank
78418	1273739	Bacillus virus Andromeda	species
65103	153301	Baboon cytomegalovirus OCOM4-37	no rank
41451	39640	Cotesia congregata bracovirus	species
33659	2060084	Pandoravirus	genus
29859	1349410	Pandoravirus salinus	species
29429	2107707	Pandoravirus macleodensis	species
28584	1349409	Pandoravirus dulcis	species
21321	2107708	Pandoravirus neocaledonia	species
20525	2732396	Orthornavirae	kingdom
18867	2083300	Diolcogaster facetosa bracovirus	species
15129	419435	Glypta fumiferanae ichnovirus	species
14864	10401	Ictalurid herpesvirus 1	species
14844	265522	Hyposoter fugitivus ichnovirus	species
13875	2559587	Riboviria	clade
11846	1605721	Pandoravirus inopinatum	species
11243	2072209	Esparto virus	no rank
10163	1969841	Proteus phage VB_PmiS-Isfahan	no rank
9099	1654582	Kallithea virus	no rank
8834	116759	Glyptapanteles indiensis bracovirus	species
8046	2107709	Pandoravirus quercus	species
6249	33706	Caviid betaherpesvirus 2	species
6168	2732007	Nucleocytoviricota	phylum
5425	2029293	Squirrelpox virus Berlin_2015	species
5416	10390	Gallid alphaherpesvirus 2	species
5390	146015	Elephantid betaherpesvirus 1	species
4978	857312	Brochothrix phage A9	no rank
4909	490711	Orgyia leucostigma nucleopolyhedrovirus	species
4797	1678078	Mollivirus sibericum	species
4548	42182	Hepatitis C virus genotype 6	genotype
4256	11084	Tick-borne encephalitis virus	species
4198	1414739	Vibrio phage SHOU24	species
4164	2732406	Kitrinoviricota	phylum
4145	10501	Phycodnaviridae	family
4112	1922616	Beihai picorna-like virus 7	species
3936	10485	Bracovirus	genus
3880	2023057	Orpheovirus IHUMI-LCC2	species
3732	2069320	Capsicum annuum amalgavirus 1	species
3678	60456	Iris yellow spot virus	no rank
3556	1920772	Gentian ovary ringspot virus	species
3532	1758139	Colombian potato soil-borne virus	species
3489	1572341	Black sea bass polyomavirus 1	no rank
3459	185955	Hibiscus latent Singapore virus	species
3205	1798085	Piscine myocarditis-like virus	species
3188	317858	Cyprinid herpesvirus 1	species
3165	10456	Spodoptera littoralis nucleopolyhedrovirus	species
3158	1906244	Cyclophragma undans nucleopolyhedrovirus	species
3132	180230	Cyprinid herpesvirus 3	species
3054	1519389	Sewage-associated circular DNA virus-13	species
2978	2756242	Aydin-like pestivirus	no rank
2743	330395	Listeria virus P100	species
2708	379529	Glossina pallidipes salivary gland hypertrophy virus	no rank
2704	11012	Partitiviridae	family
2685	96029	Yellow head virus	species
2677	1962501	Agrotis segetum nucleopolyhedrovirus A	species
2654	2732408	Pisuviricota	phylum
2641	41856	Hepatitis C virus genotype 1	genotype
2588	12330	Maize stripe tenuivirus	species
2574	251749	Phaeocystis globosa virus	species
2517	11970	Woolly monkey sarcoma virus	species
2434	439016	Marine RNA virus JP-B	no rank
2329	50292	Cercopithecine betaherpesvirus 5	species
2329	92521	Oryctes rhinoceros nudivirus	species
2301	12450	Saccharomyces cerevisiae killer virus M1	species
2197	447897	Mythimna unipuncta nucleopolyhedrovirus	species
2181	1846169	Macaca nemestrina herpesvirus 7	no rank
2137	693450	Alstroemeria necrotic streak virus	no rank
2131	1269028	Acanthamoeba polyphaga moumouvirus	no rank
2097	558016	Alphabaculovirus	genus
2062	944969	Cynomolgus macaque cytomegalovirus strain Ottawa	no rank
2054	1874002	Bacillus phage Stitch	no rank
1986	872291	Heterobasidion partitivirus 2	species
1974	1460451	Gordil virus	no rank
1894	1469906	Heterobasidion partitivirus 13	species
1882	37665	Ectocarpus siliculosus virus 1	species
1855	150286	Anguillid herpesvirus 1	species
1850	1560313	Lactococcus phage WRP3	no rank
1752	40271	Hepatitis C virus genotype 2	genotype
1718	2731360	Heunggongvirae	kingdom
1711	1980410	Bunyavirales	order
1603	10280	Molluscum contagiosum virus subtype 1	no rank
1600	1608125	Wuhan Millipede Virus 2	no rank
1574	1323525	White clover cryptic virus 2	species
1560	1241371	Abalone herpesvirus Victoria/AUS/2009	no rank
1547	172862	Fowl aviadenovirus 6	serotype
1505	58094	Choristoneura rosaceana nucleopolyhedrovirus	species
1477	10317	Cercopithecine alphaherpesvirus 2	species
1470	306323	Streptococcus virus 2972	species
1397	2560196	Orthotospovirus	genus
1393	256729	Lymphocystis disease virus - isolate China	species
1353	130556	Culex nigripalpus nucleopolyhedrovirus	species
1269	1367203	Hemileuca sp. nucleopolyhedrovirus	no rank
1233	2035399	Eptesicus fuscus gammaherpesvirus	species
1228	1580580	Agrotis segetum nucleopolyhedrovirus B	species
1220	97195	Heterosigma akashiwo virus 01	species
1214	28871	Taterapox virus	species
1195	455364	Chrysochromulina ericina virus	species
1149	120686	human papillomavirus 71	serotype
1148	32603	Human betaherpesvirus 6A	species
1129	2169746	Mythimna unipuncta granulovirus B	species
1083	764030	Pigeon adenovirus 1	serotype
1078	2840070	Lefavirales	order
1073	1094892	Megavirus chiliensis	species
1052	1675865	Perigonia lusca single nucleopolyhedrovirus	no rank
1024	208013	Agrotis ipsilon multiple nucleopolyhedrovirus	species
1018	317878	Cyprinid herpesvirus 2	species
1015	487492	Mikania micrantha mosaic virus	no rank
1014	328615	Trichoplusia ni ascovirus 2c	species
1013	202910	Bubaline alphaherpesvirus 1	species
991	2057187	Drosophila innubila nudivirus	species
983	10685	Bacillus virus SPO1	species
954	10397	Tupaiid betaherpesvirus 1	species
940	307461	Apocheima cinerarium nucleopolyhedrovirus	species
934	756282	Cellulophaga phage phiST	no rank
931	1675862	Diatraea saccharalis granulovirus	species
923	35250	Gallid alphaherpesvirus 3	species
889	2175117	Rhynchobatus djiddensis adomavirus 1	species
886	181082	Emiliania huxleyi virus 86	species
877	1811230	Callinectes sapidus reovirus 1	species
873	10699	Siphoviridae	family
873	1412875	Lactococcus phage phiL47	no rank
871	2709317	Bacteroides phage crAss002	species
870	1307954	Maruca vitrata nucleopolyhedrovirus	species
870	28321	Amsacta moorei entomopoxvirus	species
856	2721760	Pantoea phage vB_PagM_SSEM1	no rank
849	532078	Yersinia phage Yepe2	no rank
838	342409	White spot syndrome virus	species
831	10255	Variola virus	species
792	358769	Classical swine fever virus - Alfort/187	no rank
786	10371	Equid gammaherpesvirus 5	species
783	552509	Leptopilina boulardi filamentous virus	species
772	1408895	Dill cryptic virus 1	species
749	54289	Vicia cryptic virus	species
716	1307956	Leucania separata nucleopolyhedrovirus	species
711	10353	Saimiriine alphaherpesvirus 1	species
709	159252	Planaria asexual strain-specific virus-like element type 1	species
705	1736634	Torulaspora delbrueckii dsRNA Mbarr-1 killer virus	species
695	35254	Cryptophlebia leucotreta granulovirus	species
687	138184	Alcelaphine gammaherpesvirus 2	species
684	11612	Impatiens necrotic spot virus	no rank
682	1474867	Aureococcus anophagefferens virus	species
678	181083	Chlorovirus	genus
669	542343	Adoxophyes orana nucleopolyhedrovirus	species
663	38804	Yaba monkey tumor virus	species
662	1980493	Thottopalayam virus	no rank
662	2018502	Myrmica scabrinodis virus 1	species
652	479713	Primula malacoides virus China/Mar2007	no rank
641	85655	Ranid herpesvirus 1	species
627	2025333	Rosellinia necatrix partitivirus 8	species
608	10335	Human alphaherpesvirus 3	species
606	10398	Ovine gammaherpesvirus 2	species
592	74320	Buzura suppressaria nucleopolyhedrovirus	species
586	44421	Lychnis ringspot virus	species
581	1557033	Yellowstone Lake virophage 5	species
578	12657	Equid gammaherpesvirus 2	species
555	1087068	Aspergillus foetidus dsRNA mycovirus	species
555	1432856	Formica exsecta virus 1	species
549	12315	Tomato aspermy virus	species
535	1586712	Yellowstone lake mimivirus	species
534	568090	Flammulina velutipes browning virus	species
526	83442	Paramecium bursaria Chlorella virus NYs1	species
524	1411681	Rhizoctonia solani dsRNA virus 2	species
521	1750712	Cnaphalocrocis medinalis granulovirus	species
512	273354	Sororoca virus	no rank
511	2008762	Hepacivirus B	species
506	113370	Spodoptera frugiperda ascovirus 1a	species
502	1755588	Sicinivirus A	species
502	46242	Spodoptera litura nucleopolyhedrovirus	species
490	1261657	Murid betaherpesvirus 8	species
479	12643	Ectromelia virus	species
473	1027232	Groundnut ringspot and Tomato chlorotic spot virus reassortant	species
464	273356	Iaco virus	no rank
461	28883	Caudovirales	order
456	11103	Hepacivirus C	species
440	284687	Amasya cherry disease associated chrysovirus	species
439	2732523	Megaviricetes	class
432	10484	Campoletis sonorensis ichnovirus	species
429	10442	Baculoviridae	family
420	1933298	Tomato spotted wilt orthotospovirus	species
411	633135	Streptococcus virus phiAbc2	species
406	2732005	Bamfordvirae	kingdom
405	1667587	Papio ursinus cytomegalovirus	no rank
398	2200830	Akhmeta virus	species
391	167634	Grapevine rootstock stem lesion associated virus	species
391	2282206	Bufonid herpesvirus 1	species
384	2840056	Naldaviricetes	class
384	62099	Anomala cuprea entomopoxvirus	species
381	2502306	Escherichia phage vB_EcoM_G4507	no rank
362	12429	unclassified viruses	no rank
347	540070	Common midwife toad virus	species
346	1917232	Only Syngen Nebraska virus 5	species
343	1529056	Penaeus monodon nudivirus	species
341	644610	Nyamanini nyavirus	species
335	548681	Herpesvirales	order
333	460926	Tomato zonate spot virus	no rank
332	483537	Alternaria alternata virus 1	species
327	2047868	Corynebacterium phage C3PO	no rank
325	39740	Bromoviridae	family
316	163325	Capsicum chlorosis virus	no rank
312	1323523	Hop trefoil cryptic virus 2	species
305	55510	Staphylococcus virus Twort	species
303	38012	Malacosoma neustria nucleopolyhedrovirus	species
299	2560111	Ceetrepovirus	genus
299	307454	Spodoptera frugiperda granulovirus	species
295	93386	Columbid alphaherpesvirus 1	species
293	1100043	Apis mellifera filamentous virus	species
290	1663208	Ostreococcus lucimarinus virus 2	species
290	79700	rat cytomegalovirus strain Maastricht	no rank
287	1919083	Cynomolgus cytomegalovirus	species
284	10292	Herpesviridae	family
283	1605403	Non-primate hepacivirus NZP1	no rank
282	332937	Chimpanzee herpesvirus strain 105640	no rank
282	693272	Cafeteria roenbergensis virus BV-PW1	no rank
280	10320	Bovine alphaherpesvirus 1	species
277	107804	Sorghum chlorotic spot virus	species
277	1173764	Listeria phage LP-048	no rank
277	1980527	Qalyub orthonairovirus	species
267	10506	Paramecium bursaria Chlorella virus 1	species
266	1926502	Urucuri virus	no rank
260	1293572	Mythimna separata entomopoxvirus 'L'	no rank
257	50290	Aotine betaherpesvirus 1	species
253	83191	Melanoplus sanguinipes entomopoxvirus	species
250	161494	Antheraea pernyi nucleopolyhedrovirus	species
249	356114	Hepatitis C virus genotype 3	genotype
247	1587509	Persea americana chrysovirus	species
243	10621	Human papillomavirus 9	serotype
243	2732544	Martellivirales	order
243	309542	Calla lily chlorotic spot virus	no rank
241	1074428	Mouse Mosavirus	no rank
239	83871	Chrysanthemum stem necrosis virus	no rank
238	28288	Hyphantria cunea nucleopolyhedrovirus	species
234	1608440	Chimeric virus 14	species
233	190065	Fowl aviadenovirus E	species
233	35318	Patois virus	serogroup
230	2212644	Alstroemeria yellow spot virus	no rank
222	11019	Alphavirus	genus
222	2773460	Wuchang romanomermis nematode virus 2	no rank
219	1211386	Pectobacterium phage PhiM1	no rank
216	134394	Lonomia obliqua multiple nucleopolyhedrovirus	no rank
215	907191	Raspberry latent virus	species
213	10482	Polydnaviridae	family
213	2054179	Rhinolophus gammaherpesvirus 1	species
212	207656	Bacillus phage phiNIT1	no rank
210	1033976	Bean necrotic mosaic virus	no rank
209	1138490	Cachoeira Porteira virus	no rank
209	37124	Chikungunya virus	species
208	1239567	Mamastrovirus 3	species
206	1048855	Odrenisrou virus	no rank
203	1573459	Rosellinia necatrix partitivirus 6	species
200	1857323	Tospovirus kiwifruit/YXW/2014	species
199	233051	Hibiscus latent Fort Pierce virus	species
198	1458711	Mycobacterium phage Hawkeye	no rank
194	1993643	Malvastrum leaf curl deltasatellite	species
192	333760	Human papillomavirus type 16	serotype
189	1293540	Adoxophyes honmai entomopoxvirus 'L'	no rank
185	307467	Euproctis pseudoconspersa nucleopolyhedrovirus	species
184	980895	Soybean vein necrosis virus	no rank
183	12348	Lactobacillus phage LL-H	species
181	1225795	Lactobacillus phage ATCC 8014-B2	no rank
180	10358	Cytomegalovirus	genus
180	1307957	Clanis bilineata nucleopolyhedrovirus	species
178	300879	Cassia yellow blotch virus	species
178	51368	unclassified dsDNA viruses	no rank
177	10260	Avipoxvirus	genus
177	12301	Broad bean mottle virus	species
177	2115790	Cervid alphaherpesvirus 3	species
176	1933300	Watermelon silver mottle orthotospovirus	species
175	340907	Papiine alphaherpesvirus 2	species
175	35310	Bwamba orthobunyavirus	species
174	271108	Bombyx mori nucleopolyhedrovirus	species
173	1777069	Pseudomonas phage vB_PsyM_KIL4	no rank
172	12327	Barley stripe mosaic virus	species
172	59304	Una virus	species
170	2306623	Areca palm necrotic spindle-spot virus	species
170	509923	Beet cryptic virus 1	species
169	11587	Punta Toro virus	no rank
169	11819	Spleen focus-forming virus	species
166	1323528	Crimson clover cryptic virus 2	species
164	1922632	Beihai picorna-like virus 84	species
164	1940555	Murine roseolovirus	species
164	66266	Rice grassy stunt tenuivirus	species
163	430606	Polygonum ringspot orthotospovirus	species
162	1452540	Felis catus gammaherpesvirus 1	no rank
162	166921	Lymantria xylina nucleopolyhedrovirus	species
162	59376	Ectropis obliqua nucleopolyhedrovirus	species
161	2508180	Escherichia phage vB_EcoM_KAW1E185	no rank
158	2259792	Linepithema humile entomopoxvirus 1	species
157	76052	Watermelon bud necrosis virus	no rank
156	1254425	Porcine astrovirus 3	species
155	2562175	Salmonella phage ZCSE2	no rank
153	2259540	Mustela putorius papillomavirus 1	serotype
151	1647391	Streptococcus phage APCM01	species
151	166056	Epinotia aporema granulovirus	species
149	1659219	Kobuvirus cattle/Kagoshima-2-24-KoV/2015/JPN	species
146	28874	Volepox virus	species
144	1922772	Changjiang hepe-like virus 1	species
143	2043550	Medicago sativa alphapartitivirus 1	species
143	764348	Magnaporthe oryzae chrysovirus 1	species
142	659497	Sclerotinia sclerotiorum partitivirus S	species
142	699189	Iflaviridae	family
141	231992	Feldmannia irregularis virus a	species
141	70823	Dulcamara mottle virus	species
140	12303	Cowpea chlorotic mottle virus	species
139	1796992	Bacillus phage Shbh1	no rank
137	2301731	Bacteroides phage crAss001	species
135	2065044	Torque teno midi virus 3	species
134	35252	Alcelaphine gammaherpesvirus 1	species
133	10493	Frog virus 3	species
133	89471	Melon yellow spot virus	no rank
131	631345	Solenopsis invicta virus 3	species
130	10372	Human betaherpesvirus 7	species
130	132475	Yaba-like disease virus	no rank
130	1544901	Hepatitis C virus genotype 7	genotype
129	59302	Ndumu virus	species
127	12465	Barley yellow mosaic virus	species
127	1329402	Eptesipox virus	species
126	304859	Tomato yellow ring virus	no rank
124	759389	Verticillium dahliae chrysovirus 1	species
123	1608255	Suid betaherpesvirus 2	species
122	72201	Armadillidium vulgare iridescent virus	no rank
119	1986118	Ball python nidovirus 1	species
119	2572766	Caimito virus	no rank
119	2848146	Perch actinovirus	species
116	1980419	Tospoviridae	family
115	889813	Colobus guereza papillomavirus 2	serotype
114	188938	Pronghorn antelope pestivirus	no rank
113	1608105	Wuhan House Fly Virus 2	no rank
113	1922716	Beihai tombus-like virus 13	species
111	1980433	Rose rosette emaravirus	species
111	2065046	Torque teno midi virus 5	species
110	2048061	Escherichia phage DTL	no rank
110	64294	Yokose virus	species
109	261939	Ostreid herpesvirus 1	species
108	2732017	Epseptimavirus	genus
106	1266451	Mulberry vein banding virus	species
106	929835	Vibrio phage pYD38-B	species
105	35243	Ateline alphaherpesvirus 1	species
104	1932886	Acinetobacter phage vB_AbaP_AS11	no rank
104	2005054	Pasteurella phage vB_PmuP_PHB02	no rank
103	10294	Simplexvirus	genus
102	1329650	Bat circovirus	species
102	2022783	Common bottlenose dolphin gammaherpesvirus 1 strain Sarasota	species
101	10271	Rabbit fibroma virus	species
101	328614	Heliothis virescens ascovirus 3f	no rank
100	1781241	Delisea pulchra RNA virus	species
99	170617	Adoxophyes orana granulovirus	species
98	188141	Spring beauty latent virus	species
98	2509492	Luchacovirus	subgenus
98	262177	Orgyia pseudotsugata multiple nucleopolyhedrovirus	species
97	10242	Orthopoxvirus	genus
97	10386	Gallid alphaherpesvirus 1	species
97	1608068	Shayang Spider Virus 1	no rank
97	307444	Erinnyis ello granulovirus	species
97	32604	Human betaherpesvirus 6B	species
96	167129	Moroccan watermelon mosaic virus	species
96	2065050	Torque teno midi virus 9	species
95	2283236	Aplysia californica nido-like virus	species
95	35244	Bovine alphaherpesvirus 5	species
94	1965467	Lactococcus phage AM1	no rank
94	619591	Monkeypox virus Zaire-96-I-16	no rank
93	1070315	Hyposidra talaca NPV	species
92	10454	Spodoptera exigua multiple nucleopolyhedrovirus	species
92	447605	Lindernia anagallis yellow vein virus satellite DNA beta	species
91	1978413	Watermelon virus A	species
91	35258	Lambdapapillomavirus 2	species
90	10325	Macacine alphaherpesvirus 1	species
90	10492	Ranavirus	genus
90	1922353	Beihai astro-like virus	species
90	2219109	Botrytis cinerea hypovirus 1 satellite-like RNA	species
89	1006972	Campylobacter virus IBB35	species
89	2575328	Salmonella phage SE4	species
89	485724	Melon severe mosaic tospovirus	species
88	1504288	Bovine gammaherpesvirus 6	species
87	1074325	Sclerotinia sclerotiorum hypovirus 1	species
87	1419109	Harp seal herpesvirus	no rank
87	2419940	Tea plant line pattern virus	species
86	10662	Myoviridae	family
86	1131315	Erwinia phage PEp14	species
85	1323524	Red clover cryptic virus 2	species
83	1535247	Saimiriine betaherpesvirus 4	species
82	1923713	Wuhan house centipede virus 9	species
82	2014960	Linda virus	species
82	42683	Paramecium bursaria Chlorella virus CVA-1	no rank
81	2053981	Tomelloso virus	no rank
80	1283294	Longquan virus	no rank
80	2169622	Unaquatrovirus	genus
80	687333	Gammatorquevirus	genus
79	1511853	Alphanudivirus	genus
78	1629551	Groundnut chlorotic fan-spot virus	no rank
77	1076255	Yokapox virus	species
77	1857843	Kayvirus	genus
77	399781	Paramecium bursaria Chlorella virus FR483	no rank
76	11102	Hepacivirus	genus
76	1128424	Helicoverpa zea nudivirus 2	no rank
76	2719593	Enterococcus phage nattely	species
76	548914	Elephant endotheliotropic herpesvirus 4	species
76	687380	Torque teno midi virus 2	species
75	10286	Betaentomopoxvirus	genus
75	1486469	Mycobacterium phage Damien	species
75	748667	Grapevine Bulgarian latent virus	species
75	937809	Cordyline virus 1	species
74	549779	Mimiviridae	family
73	1387301	Heterobasidion partitivirus 7	species
73	508441	Ictalurid herpesvirus 2	species
71	2152923	Sogatella furcifera hepe-like virus	species
70	1432847	Oenococcus phage phiS11	no rank
69	10243	Cowpox virus	species
69	1385385	Streptococcus phage TP-778L	species
68	1608083	Tacheng Tick Virus 1	no rank
68	1904876	Human DNA virus	species
66	1051631	Streptococcus phage YMC-2011	species
66	1566990	Streptococcus phage SpSL1	species
66	1810944	Tunis virus	no rank
65	10288	Choristoneura biennis entomopoxvirus	species
65	1772319	Arthrobacter phage Tank	no rank
65	1945560	Alphamesonivirus 2	species
65	28873	Camelpox virus	species
65	44088	Canarypox virus	species
65	467989	Imjin virus	no rank
64	10276	Swinepox virus	species
64	1493829	Persimmon virus B	species
64	1546257	Tipula oleracea nudivirus	species
64	2065054	Torque teno midi virus 13	species
64	63746	Hepatitis C virus (isolate H77)	no rank
64	687379	Torque teno midi virus 1	species
63	78219	Mamestra brassicae multiple nucleopolyhedrovirus	species
62	10345	Suid alphaherpesvirus 1	species
62	1455074	Enterobacter phage PG7	no rank
62	2018501	Lasius neglectus virus 1	species
62	722417	Campylobacter virus CP220	species
61	1623305	Skunavirus	genus
61	37108	Meleagrid alphaherpesvirus 1	species
61	765765	Colwellia phage 9A	no rank
60	10310	Human alphaherpesvirus 2	species
60	1168744	Listeria phage vB_LmoM_AG20	no rank
60	1685748	Lake Sarah-associated circular virus-21	species
60	2065049	Torque teno midi virus 8	species
60	2662314	Mastomys natalensis polyomavirus 3	species
60	315953	Acidianus two-tailed virus	species
58	257816	Cotesia glomerata bracovirus	species
58	320432	Chrysodeixis chalcites nucleopolyhedrovirus	species
57	172861	Fowl aviadenovirus 5	no rank
57	2025359	Murmansk poxvirus	no rank
56	1293539	Choristoneura rosaceana entomopoxvirus 'L'	no rank
56	2338396	Grapevine associated tymo-like virus	species
55	1497848	Papaya meleira virus	species
55	1926594	Enterococcus phage EFP01	no rank
54	10483	Ichnovirus	genus
54	2547431	Lentinula edodes negative-strand RNA virus 2	no rank
54	345922	Bacillus phage Fah	species
53	11096	Classical swine fever virus	no rank
52	1408257	Turkey aviadenovirus 4	serotype
52	1903266	Cedratvirus A11	species
52	384848	Corynebacterium phage P1201	no rank
52	584892	Bacillus phage Bcp1	no rank
52	880159	Bathycoccus sp. RCC1105 virus BpV1	no rank
51	1084719	Bacillus virus G	species
51	297254	Lactobacillus virus LLKu	species
50	2497569	Negarnaviricota	phylum
50	2843418	Lillamyvirus	genus
49	2601628	Salmonella phage 1-29	no rank
48	11780	Snyder-Theilen feline sarcoma virus	species
48	1406779	Acinetobacter phage Petty	no rank
48	1408894	Red clover cryptic virus 1	species
46	129726	Pseudocowpox virus	species
46	1511809	Betapartitivirus	genus
46	246343	Turkey astrovirus 2	no rank
46	548687	Macavirus	genus
45	1476485	Andrographis yellow vein leaf curl betasatellite	species
45	1850906	Catopsilia pomona nucleopolyhedrovirus	species
45	2016455	Ailuropoda melanoleuca papillomavirus 2	serotype
45	2509616	Homarus gammarus nudivirus	species
44	10497	African swine fever virus	species
44	283494	Geminialphasatellitinae	subfamily
44	47416	Satsuma dwarf virus	species
43	1150861	Canine picodicistrovirus	no rank
43	11777	Feline sarcoma virus (STRAIN HARDY-ZUCKERMAN 4)	no rank
43	12336	Clostridium phage c-st	species
43	1857844	Pecentumvirus	genus
43	2732549	Durnavirales	order
43	359919	Spodoptera litura granulovirus	species
43	432587	Gryllus bimaculatus nudivirus	species
42	10374	Gammaherpesvirinae	subfamily
42	1406134	Murrumbidgee virus	species
42	51313	Helicoverpa armigera nucleopolyhedrovirus	species
41	1458852	Listeria phage LP-030-3	species
41	1590650	Adelie penguin polyomavirus	no rank
41	47985	Grapevine leafroll-associated virus 1	species
41	59749	Maize rayado fino virus	species
40	100217	Epizootic haematopoietic necrosis virus	species
40	1423347	Sclerotinia sclerotiorum hypovirus 2	species
40	1629132	Graminella nigrifrons virus 1	species
40	2024264	Agrobacterium phage Atu_ph07	no rank
39	10241	Chordopoxvirinae	subfamily
39	1105379	Porcine astrovirus 4	species
39	1516128	Chaetoceros tenuissimus RNA virus type-II	species
39	207830	Mamestra configurata nucleopolyhedrovirus A	species
39	627585	Bat astrovirus Tm/Guangxi/LD77/2007	no rank
38	10366	Murid betaherpesvirus 1	species
38	1572704	Staphylococcus phage phiIPLA-C1C	no rank
38	1589747	Achromobacter phage 83-24	no rank
38	1922391	Beihai hermit crab virus 4	no rank
37	1921009	Arachis pintoi virus	species
36	1434720	Beluga whale alphaherpesvirus 1	no rank
36	190064	Fowl aviadenovirus D	species
36	2315529	Gordonia phage Buggaboo	species
36	2478919	Orthopoxvirus Abatino	no rank
36	648998	Penguinpox virus	species
36	692606	Cyprinivirus	genus
35	10449	Lymantria dispar multiple nucleopolyhedrovirus	species
35	1577776	Dendrolimus punctatus cypovirus 22	species
35	2016454	Ailuropoda melanoleuca papillomavirus 1	serotype
34	1134579	Lunk virus NKS-1	no rank
34	1813615	Picornavirales Bu-1	no rank
34	1912759	Equus caballus papillomavirus 8	serotype
34	1922350	Beihai Nido-like virus 1	no rank
34	1923743	Wuhan nido-like virus 1	species
34	2059380	Flamingopox virus FGPVKD09	species
34	2881391	Campylobacter phage CP21	no rank
34	53988	Microplitis demolitor bracovirus	species
33	10464	Agrotis segetum granulovirus	species
33	1933107	Escherichia phage vB_EcoP_B	no rank
33	2315721	Spodoptera eridania nucleopolyhedrovirus	species
32	1198219	Sweet potato leaf curl China virus	species
32	192584	Phthorimaea operculella granulovirus	species
32	1980431	Raspberry leaf blotch emaravirus	species
32	260797	Heliothis virescens ascovirus 3e	no rank
32	2660760	Actinidia emaravirus 2	species
32	90410	Streptococcus virus DT1	species
32	942041	Heterobasidion partitivirus 1	species
31	1873958	Pectobacterium phage PP16	no rank
31	1911439	Corey virus	species
31	2560086	Alcyoneusvirus	genus
31	85618	Ateline gammaherpesvirus 3	species
30	1016879	Cutthroat trout virus	no rank
30	10240	Poxviridae	family
30	11788	Abelson murine leukemia virus	species
30	169691	Tobacco leaf curl disease associated sequence	no rank
30	1880590	Tenacibaculum phage pT24	no rank
30	333767	Alphapapillomavirus 3	species
30	644007	Streptococcus phage PH10	species
30	96491	Gill-associated virus	species
29	2077304	Leptonychotes weddellii papillomavirus 3	species
29	2077307	Leptonychotes weddellii papillomavirus 6	species
29	381899	Paramecium bursaria Chlorella virus A1	species
29	741942	Lactococcus phage 1358	no rank
28	111469	Retroperitoneal fibromatosis-associated herpesvirus	no rank
28	129951	Human mastadenovirus C	species
28	1977144	Vespertiliovirus	genus
28	2169995	Ryukyu mammarenavirus	species
28	2219135	Alces alces faeces associated microvirus MP12 5423	species
28	2315766	Enterococcus phage EfV12-phi1	no rank
28	2732969	Baoshanvirus	genus
28	2772061	crAssphage cr107_1	species
28	333759	Human papillomavirus type 10	serotype
28	930275	Cotia virus SPAn232	no rank
27	10379	Rhadinovirus	genus
27	1112202	Papaya leaf curl alphasatellite	species
27	1262512	Staphylococcus phage Team1	no rank
27	1592576	Condylorrhiza vestigialis MNPV	species
27	2060091	Ralstonia phage RsoP1IDN	no rank
27	44561	Murine type C retrovirus	no rank
26	10357	Betaherpesvirinae	subfamily
26	1105381	Posavirus 2	species
26	12235	Cucumber green mottle mosaic virus	species
26	1491393	Jingmen tick virus	no rank
26	1856565	Bellavista virus	no rank
26	310907	Enterovirus H	species
26	315393	Mimivirus	genus
26	330396	Listeria phage B025	species
26	39729	Potyviridae	family
26	646413	Streptococcus phage 5093	species
25	1647475	Gordonia phage GTE8	species
25	1920526	Azobacteroides phage ProJPt-Bp1	species
25	1920988	Diabrotica virgifera virgifera virus 2	species
25	1980428	High Plains wheat mosaic emaravirus	species
25	2052851	Sambucus virus S	species
25	302070	Begomovirus-associated DNA-III	species
24	101688	Apple latent spherical virus	species
24	12300	Bromovirus	genus
24	1759525	Bacillus phage vB_BceS-MY192	no rank
24	2083176	Oxyplax ochracea nucleopolyhedrovirus	species
24	2304619	Canine papillomavirus 21	species
24	2731691	Drexlerviridae	family
24	2732506	Pisoniviricetes	class
24	273355	Anhembi virus	no rank
24	322019	Acanthocystis turfacea chlorella virus 1	species
24	35287	Rice tungro spherical virus	species
23	10261	Fowlpox virus	species
23	11855	Mason-Pfizer monkey virus	species
23	1301279	Invertebrate iridovirus 22	species
23	1392231	Streptococcus phage 20617	species
23	1398507	Felis catus papillomavirus 4	serotype
23	305674	Deerpox virus W-848-83	no rank
23	389214	Ranid herpesvirus 2	species
22	158372	Penicillium chrysogenum virus	species
22	1732063	Staphylococcus phage SPbeta-like	species
22	176652	Invertebrate iridescent virus 6	species
22	1898060	Lymphocystis disease virus Sa	species
22	2025595	Abisko virus	species
22	2164103	Apple rubbery wood virus 2	no rank
22	218667	Oyster mushroom spherical virus	species
22	332054	Trichoplusia ni single nucleopolyhedrovirus	species
22	51677	Xestia c-nigrum granulovirus	species
22	640897	Phytophthora infestans RNA virus 1	species
22	990303	Papio hamadryas papillomavirus 1	serotype
21	10381	Saimiriine gammaherpesvirus 2	species
21	1675548	Mycobacterium phage Barriga	species
21	1965068	Simian hemorrhagic encephalitis virus	no rank
21	206377	Buenaventura virus	no rank
21	2170142	Chaetoceros protobacilladnavirus 3	species
21	2293296	Millipede associated circular virus 1	species
21	2364291	Papaya cytorhabdovirus	species
21	447604	Tomato yellow leaf curl Vietnam betasatellite	species
21	83129	Lactococcus virus P008	species
21	915293	Ageratum yellow vein Singapore alphasatellite	species
20	1158189	Chaco virus	no rank
20	135246	Trocara virus	species
20	1519999	Staphylococcus phage phiBU01	no rank
20	1557035	Yellowstone Lake virophage 7	species
20	1640973	Pseudomonas phage DL64	species
20	1982251	Pahexavirus	genus
20	2010327	Tobacco leaf curl Patna betasatellite	species
20	2065055	Torque teno midi virus 14	species
20	2079285	Mycobacterium phage Rem711	species
20	236807	Iranian wheat stripe tenuivirus	species
20	2560065	Herelleviridae	family
20	2560160	Kochikohdavirus	genus
20	2560801	Testudinid alphaherpesvirus 3	species
20	336486	Turkeypox virus	species
20	455363	unclassified Phycodnaviridae	no rank
20	46021	Paramecium bursaria Chlorella virus NY2A	species
20	558017	Betabaculovirus	genus
20	573174	Vibrio phage henriette 12B8	species
19	10298	Human alphaherpesvirus 1	species
19	103881	Potato yellow vein virus	species
19	1592335	Pseudoplusia includens SNPV IE	no rank
19	1788442	Circovirus-like genome DCCV-2	species
19	1857890	Staphylococcus virus Remus	species
19	2025338	Sus scrofa papillomavirus 2	species
19	2315716	Streptomyces phage Darolandstone	no rank
19	285013	Sulfolobus virus STSV1	species
19	36355	Pseudalatia unipuncta granulovirus	no rank
19	563121	Mycobacterium phage Konstantine	no rank
19	999729	Leanyer virus	no rank
18	103722	Grapevine fleck virus	species
18	1127516	Pectobacterium phage ZF40	species
18	12302	Brome mosaic virus	species
18	12851	Tomato chlorotic spot virus	no rank
18	148363	Helicoverpa armigera nucleopolyhedrovirus G4	no rank
18	1582152	Clostridium phage phiCD211	species
18	1591444	Thaumetopoea pityocampa iflavirus 1	species
18	1732201	Tadarida brasiliensis circovirus 1	no rank
18	1810396	Squash chlorotic leaf spot virus	species
18	1843768	Duck faeces associated circular DNA virus 1	species
18	1923247	Hubei tetragnatha maxillosa virus 5	species
18	1926997	Bivalve RNA virus G4	species
18	1961665	Qinghai Himalayan marmot astrovirus 1	species
18	2057942	Pleurochrysis carterae circular virus	species
18	2483612	Salmonella phage Seafire	no rank
18	2500816	Lactococcus phage 8V08	no rank
18	2502409	Escherichia phage vB_EcoM_Goslar	no rank
18	2601626	Klebsiella phage Soft	no rank
18	2773314	red squirrel adenovirus 1	no rank
17	10264	Pigeonpox virus	species
17	1623308	Wbetavirus	genus
17	1923772	Xinzhou nematode virus 4	no rank
17	1958956	Erwinia phage vB_EamM_Yoloswag	no rank
17	2016400	Morelia viridis nidovirus	no rank
17	2023996	Synechococcus phage Bellamy	no rank
17	2093224	Pistachio ampelovirus A	species
17	2303488	Zegla virus	no rank
17	2508071	Pantoea phage vB_PagM_LIET2	no rank
17	2763102	Enterococcus phage 9183	species
17	693996	Alphacoronavirus	genus
16	10319	Varicellovirus	genus
16	10385	Bovine gammaherpesvirus 4	species
16	1346829	Peridroma alphabaculovirus	species
16	1522059	Bovine astrovirus CH13	species
16	1891704	Sophora japonica powdery mildew-associated partitivirus	species
16	249151	Neodiprion lecontei nucleopolyhedrovirus	species
16	328061	Radish mosaic virus	species
16	573172	Vibrio phage eugene 12A10	species
16	64003	Grapevine leafroll-associated virus 2	species
15	10265	Capripoxvirus	genus
15	10293	Alphaherpesvirinae	subfamily
15	1036255	Papaya leaf curl betasatellite-Panipat 6 [India:Panipat:Papaya:2008]	no rank
15	10455	Spodoptera frugiperda multiple nucleopolyhedrovirus	species
15	1406781	Bacillus phage BigBertha	no rank
15	1582151	Clostridium phage phiCD146	no rank
15	1690456	Bacillus phage TsarBomba	no rank
15	1736759	Chayote yellow mosaic Benin betasatellite	no rank
15	1815988	Erwinia phage vB_EamM_Simmy50	no rank
15	1922527	Beihai picorna-like virus 1	species
15	1980928	Sepunavirus	genus
15	198612	Groundnut bud necrosis virus	no rank
15	2499625	Stemphylium lycopersici mycovirus	species
15	270478	Zantedeschia mild mosaic virus	species
14	10331	Equid alphaherpesvirus 4	species
14	10359	Human betaherpesvirus 5	species
14	10376	Human gammaherpesvirus 4	species
14	1297646	Corchorus yellow vein mosaic betasatellite	species
14	1399966	pigeon mesivirus 1	no rank
14	1432848	Oenococcus phage phiS13	no rank
14	1513458	Marseillevirus	genus
14	1540090	Bacillus phage Mater	no rank
14	187977	Wild potato mosaic virus	species
14	190729	Betasatellite	genus
14	1923763	Xingshan nematode virus 4	no rank
14	1932881	Pacmanvirus A23	species
14	1955175	Cordoba virus	species
14	196894	unclassified Siphoviridae	no rank
14	270473	Pneumonia virus of mice J3666	no rank
14	443746	Asparagus virus 1	species
14	56947	Choristoneura fumiferana granulovirus	species
14	655314	unclassified Kobuvirus	no rank
14	859651	Rosellinia necatrix partitivirus 2	species
13	10266	Sheeppox virus	species
13	11050	Flaviviridae	family
13	11095	Pestivirus	genus
13	11118	Coronaviridae	family
13	11884	Y73 sarcoma virus	species
13	1454028	Dragonfly larvae associated circular virus-7	species
13	1500757	Pseudomonas phage phiPSA1	species
13	1675866	Urbanus proteus nucleopolyhedrovirus	species
13	1912590	Shingleback nidovirus 1	species
13	1965472	Lactococcus phage AM4	no rank
13	2006930	Pasteurella phage PHB01	no rank
13	2212563	CrAssphage sp.	species
13	2733127	Rosemountvirus	genus
13	2842522	Azeredovirinae	subfamily
13	2843351	Audreyjarvisvirus	genus
13	2847087	GB virus-B	no rank
13	292278	Marituba virus	no rank
13	354260	Lactococcus phage P335 sensu lato	species
13	39420	Feldmannia species virus	species
13	629730	Cacao virus	no rank
13	686983	Avian sapelovirus	species
13	98383	Plutella xylostella granulovirus	species
12	1074210	Mouse astrovirus M-52/USA/2008	species
12	11807	Harvey murine sarcoma virus	species
12	1469908	Heterobasidion partitivirus 15	species
12	1495316	Soybean cyst nematode virus 5	species
12	1502101	Sclerotinia sclerotiorum debilitation-associated RNA virus 2	species
12	1504569	Fox fecal rhabdovirus	species
12	1712389	Tetterwort vein chlorosis virus	species
12	2219110	Botrytis cinerea hypovirus 1 satellite-like RNA-S	species
12	2292426	Blackcurrant leafroll-associated virus 1	species
12	2320195	Pectobacterium phage Lelidair	no rank
12	2420237	Clostridium phage CPD2	no rank
12	28314	Aleutian mink disease virus	no rank
12	405554	White bream virus	species
12	70600	Epiphyas postvittana nucleopolyhedrovirus	species
12	749413	Deep-sea thermophilic phage D6E	species
11	106332	Papiine gammaherpesvirus 1	species
11	112229	Pepino mosaic virus	species
11	1161927	Pseudomonas phage Lu11	species
11	12104	Encephalomyocarditis virus	no rank
11	1273755	Halorubrum Tailed Virus 8	species
11	1465751	Anopheles minimus iridovirus	species
11	1521392	McMurdo Ice Shelf pond-associated circular DNA virus-8	species
11	1922664	Beihai sesarmid crab virus 4	no rank
11	2050971	Lumpfish flavivirus	species
11	2169621	Limdunavirus	genus
11	2772067	crAssphage cr11_1	species
11	380598	Paramecium bursaria Chlorella virus AR158	species
11	414528	Chilli ringspot virus	species
11	47929	Macacine betaherpesvirus 3	species
11	578305	Gayfeather mild mottle virus	species
10	1048207	Escherichia phage phiEB49	no rank
10	1123958	Chimpanzee adenovirus Y25	serotype
10	1327985	Cellulophaga phage phi46:3	species
10	1414655	Pepper chlorotic spot virus	no rank
10	1498168	Enterococcus phage ECP3	no rank
10	1608095	Wenzhou Shrimp Virus 1	no rank
10	1692045	Tobacco virus 1	species
10	1698710	Mycobacterium phage HyRo	no rank
10	186815	Heterobasidion annosum P-type partitivirus	no rank
10	212035	Acanthamoeba polyphaga mimivirus	species
10	2201424	Erwinia phage vB_EamM_Alexandra	no rank
10	2231345	Salmonella phage S116	no rank
10	2292642	Turtle grass virus X	species
10	2772070	crAssphage cr110_1	species
10	2772078	crAssphage cr271_1	species
10	377463	Malvastrum yellow mosaic virus satellite DNA beta	species
10	47900	Garlic common latent virus	species
10	548682	Alloherpesviridae	family
10	629735	Itaporanga virus	no rank
10	631431	Heterobasidion partitivirus 3	species
10	879096	Hepatitis E virus rat/R63/DEU/2009	no rank
9	10533	Human adenovirus 1	serotype
9	1137745	Cyanophage S-TIM5	no rank
9	1211417	uncultured crAssphage	species
9	1566307	Western grey kangaroopox virus	no rank
9	157897	Rudiviridae	family
9	157899	Sulfolobus islandicus rod-shaped virus 2	no rank
9	160796	Skunkpox virus	species
9	1636250	Proteus phage vB_PmiM_Pm5461	species
9	1715290	Canary bornavirus 2	no rank
9	1849533	Fusarium poae partitivirus 2	species
9	1849534	Fusarium poae virus 1-240374	no rank
9	1857889	Silviavirus	genus
9	1912760	Cequinquevirus	genus
9	1923138	Hubei picorna-like virus 56	species
9	1923717	Wuhan insect virus 13	species
9	2025352	Wild vitis virus 1	no rank
9	2041210	Lactobacillus phage LpeD	no rank
9	2065052	Torque teno midi virus 11	species
9	2201444	Microbacterium phage Zeta1847	no rank
9	244589	Sulfolobus spindle-shaped virus 1	species
9	2502470	Mycobacterium phage NoodleTree	species
9	263578	Tomato leaf curl Java virus-[Ageratum] satellite DNA	no rank
9	2743994	Mycobacterium phage Gail	species
9	347327	Pseudomonas phage PA11	no rank
9	37296	Human gammaherpesvirus 8	species
9	40523	Listeria virus A511	species
9	445684	Synechococcus phage Syn19	no rank
9	543939	Sputnik virophage	no rank
9	656520	Diodia vein chlorosis virus	species
9	673839	Enterococcus phage phiFL4A	species
9	694015	Beluga whale coronavirus SW1	species
8	1041883	Big Sioux River virus	species
8	10552	Aviadenovirus	genus
8	10617	Human papillomavirus 4	serotype
8	113366	Heliothis virescens ascovirus 3a	species
8	1141136	Cronobacter phage vB_CsaM_GAP32	no rank
8	11878	Avian sarcoma virus CT10	species
8	134606	Trichoplusia ni cypovirus 15	no rank
8	1391455	Phormidium phage MIS-PhV1A	species
8	1567013	Clostridium phage phiCT453B	species
8	1647454	Salmonella phage SE24	no rank
8	1675554	Mycobacterium phage Pops	no rank
8	1821545	Enseada virus	no rank
8	1923555	Wenzhou bivalvia virus 3	species
8	1961666	Qinghai Himalayan marmot astrovirus 2	species
8	1965063	DeBrazza's monkey arterivirus	no rank
8	2109373	Chicken stool associated circular virus 1	species
8	224399	Adoxophyes honmai nucleopolyhedrovirus	species
8	2249313	Phascolarctid gammaherpesvirus 1	species
8	2283029	Dickeya phage vB_DsoM_AD1	no rank
8	2294149	Passiflora edulis symptomless virus	species
8	2489618	Pectobacterium phage Clickz	no rank
8	2489628	Pectobacterium phage Koot	no rank
8	2601256	Tomato leaf curl Anand alphasatellite	species
8	2608321	Aeromonas phage vB_AhyS-A18P4	species
8	2842942	Paundecimvirus	genus
8	37128	Potato mop-top virus	species
8	436242	Pepper leaf curl virus satellite DNA beta	species
8	880161	Micromonas sp. RCC1109 virus MpV1	species
8	881953	Lactococcus phage 949	no rank
8	946046	Ugandan cassava brown streak virus	species
7	101850	Thysanoplusia orichalcea nucleopolyhedrovirus	species
7	10491	Chloriridovirus	genus
7	108098	Human mastadenovirus B	species
7	1104917	Crocuta crocuta papillomavirus 1	serotype
7	11099	Bovine viral diarrhea virus 1	no rank
7	11216	Human respirovirus 3	species
7	1128151	Mimivirus terra2	species
7	119222	Pestivirus giraffe-1 H138	no rank
7	1262518	Leuconostoc phage LN25	no rank
7	1308863	Bacillus phage vB_BanS-Tsamsa	species
7	140052	Betaretrovirus	genus
7	1477406	Dickeya phage RC-2014	no rank
7	1588764	Gemycircularvirus SL1	no rank
7	1589746	Achromobacter phage JWX	no rank
7	168238	Porcine endogenous retrovirus E	no rank
7	1813599	Brazilian marseillevirus	species
7	1873949	Pseudomonas phage Andromeda	no rank
7	1922327	Wphvirus	genus
7	1922583	Beihai picorna-like virus 4	species
7	1933412	Escherichia phage vB_EcoS-IME253	no rank
7	1964806	Coronavirus AcCoV-JC34	species
7	2031200	Tomato leaf curl Nepal betasatellite	species
7	2099567	Ti ringspot-associated emaravirus	species
7	2315544	Mycobacterium phage Paito	species
7	235434	Ceratocystis polonica partitivirus	no rank
7	2419618	Bacillus phage vB_BboS-125	no rank
7	2601527	Ovine adenovirus 8	no rank
7	2766976	hepatovirus H2	no rank
7	2772068	crAssphage cr8_1	species
7	2871198	Acipenserid herpesvirus 2	species
7	333764	Human papillomavirus type 34	serotype
7	36344	Chelonus inanitus bracovirus	species
7	43130	Onion yellow dwarf virus	species
7	447600	Mimosa yellow leaf curl virus satellite DNA beta	species
7	45455	Macacine gammaherpesvirus 4	species
7	46015	Autographa californica nucleopolyhedrovirus	no rank
7	523909	Musca domestica salivary gland hypertrophy virus	no rank
7	713089	Croton yellow vein mosaic alphasatellite	species
7	73422	Streptococcus phage TP-J34	species
7	936059	Tursiops truncatus papillomavirus 1	serotype
6	11572	Orthobunyavirus	genus
6	11632	Retroviridae	family
6	1325372	Edwardsiella phage PEi21	no rank
6	1327971	Cellulophaga phage phi19:3	species
6	153135	Gammaretrovirus	genus
6	1547495	Salivirus FHB	species
6	1557034	Yellowstone Lake virophage 6	species
6	1579460	Parapoxvirus red deer/HL953	no rank
6	1582150	Clostridium phage phiCD111	no rank
6	1608084	Tacheng Tick Virus 2	no rank
6	1678146	Orthohepevirus D	species
6	1685740	Lake Sarah-associated circular virus-14	species
6	1775963	Jasmine virus T	species
6	1815630	Pseudomonas phage pf16	no rank
6	1849335	Arabidopsis halleri partitivirus 1	species
6	1884879	Parrot bornavirus 5	no rank
6	1922815	Changjiang tombus-like virus 21	species
6	1923130	Hubei picorna-like virus 49	species
6	1965482	Lactococcus phage LW81	no rank
6	1980418	Phenuiviridae	family
6	1985726	Klebsiella virus KP32	species
6	2004966	Rhinolophus associated gemykibivirus 2	no rank
6	2042482	Eastern grey kangaroopox virus	no rank
6	2047782	Escherichia phage PGT2	no rank
6	2048978	Pseudomonas phage tabernarius	no rank
6	2049883	Mirabilis leaf curl betasatellite	species
6	2163633	Erwinia phage Cronus	species
6	2170082	Pestivirus C	species
6	2315692	Marine RNA virus BC-2	no rank
6	2483623	Mycobacterium phage CRB2	species
6	2560220	Samistivirus	genus
6	2560419	Enterococcus virus EF24C	species
6	2733220	Vojvodinavirus	genus
6	2741073	uncultured phage_MedDCM-OCT-S42-C7	no rank
6	274584	Thielaviopsis basicola mitovirus	species
6	2777318	Bacillus phage DLc1	species
6	2848317	Trichechus manatus latirostris papillomavirus 4	no rank
6	291589	Trichechus manatus papillomavirus 1	serotype
6	333762	Human papillomavirus type 26	serotype
6	537009	Stygiolobus rod-shaped virus	no rank
6	627576	Bat astrovirus Tm/Guangxi/LD38/2007	no rank
6	655689	Itaituba virus	no rank
6	675071	Virgaviridae	family
6	680287	Rosenblumvirus	genus
6	754039	Synechococcus phage S-IOM18	no rank
6	759390	Sida golden mottle virus	species
5	1034806	Mosquito VEM virus SDRBAJ	species
5	12332	Rice hoja blanca tenuivirus	species
5	1285600	Nile crocodilepox virus	species
5	1335230	Pseudomonas phage PaBG	no rank
5	1351702	Sulfolobus monocaudavirus SMV1	species
5	1416012	Enterococcus phage IME_EF3	no rank
5	1424280	Sierra Nevada virus	no rank
5	1434319	Staphylococcus phage vB_SepS_SEP9	no rank
5	1513278	Hibiscus green spot virus 2	species
5	1555202	Escherichia phage 121Q	no rank
5	1560514	Melbournevirus	species
5	1587907	Streptococcus phage M102AD	species
5	159144	Utinga virus	no rank
5	1608075	Shuangao Insect Virus 1	no rank
5	1642929	Lambdina fiscellaria nucleopolyhedrovirus	species
5	1685754	Lake Sarah-associated circular virus-27	species
5	1685756	Lake Sarah-associated circular virus-29	species
5	170325	Canid alphaherpesvirus 1	species
5	1705092	Ageratum conyzoides symptomless alphasatellite	species
5	180170	Infectious spleen and kidney necrosis virus	species
5	1871153	Nylanderia fulva virus 1	species
5	1918010	Bastillevirus	genus
5	1923701	Wuhan heteroptera virus 1	species
5	1936072	Kibale red colobus virus 2	no rank
5	1961914	Pectobacterium phage PPWS4	no rank
5	2014604	Dromedary camel bocaparvovirus 2	no rank
5	2040662	Tomato yellow leaf curl Shandong betasatellite	species
5	2099521	Nesidiocoris tenuis iflavirus 1	species
5	217615	Grapevine leafroll-associated virus 7	species
5	2250309	Mycobacterium phage Steamy	species
5	2283013	Bacillus phage BSP38	no rank
5	2419939	Tea plant necrotic ring blotch virus	species
5	2499909	Escherichia phage AnYang	species
5	2500810	Bacillus phage DK3	no rank
5	2507863	Gordonia phage NosilaM	species
5	2517971	Mycobacterium phage Typha	species
5	2560327	Avian paraavulavirus 3	species
5	2588503	Corynebacterium phage Stickynote	species
5	2591129	Mycobacterium phage Mahavrat	species
5	2592615	Vibrio phage USC-1	no rank
5	260121	Mycobacterium virus Bethlehem	species
5	2664246	Photobacterium phage PDCC-1	no rank
5	2697049	Severe acute respiratory syndrome coronavirus 2	no rank
5	2704413	Lymphocystis disease virus 4	species
5	273352	Macaua virus	no rank
5	2761110	Providencia phage vB_PreS-Stilesk	species
5	2772074	crAssphage cr85_1	species
5	2772089	crAssphage cr115_1	species
5	2842609	Claudivirus	genus
5	31631	Human coronavirus OC43	no rank
5	376849	Lumpy skin disease virus NI-2490	no rank
5	390157	Senecavirus A	species
5	39780	unclassified dsRNA viruses	no rank
5	40272	Roseolovirus	genus
5	427315	Tomato yellow dwarf disease associated satellite DNA beta-[Kochi]	species
5	436243	Tomato leaf curl Joydebpur betasatellite	species
5	444860	Synechococcus phage S-SM2	species
5	455649	Spiroplasma virus SkV1CR23x	species
5	566270	Spodoptera litura nucleopolyhedrovirus II	species
5	635076	Ageratum leaf curl Cameroon betasatellite	species
5	642478	Lettuce chlorosis virus	species
5	68347	Wiseana iridescent virus	no rank
5	722418	Campylobacter virus CPt10	species
5	75747	Fusarium poae virus 1	species
5	906669	Escherichia phage HK639	species
4	1195087	Sunshine Coast virus	no rank
4	1225794	Lactobacillus virus ATCC8014	species
4	1231334	Tomato leaf curl Hajipur betasatellite	species
4	12730	Human respirovirus 1	species
4	1301280	Invertebrate iridovirus 25	species
4	1305708	Clostridium phage vB_CpeS-CP51	species
4	1312872	Mesoniviridae	family
4	1337877	Paenibacillus phage phiIBB_P123	no rank
4	1399941	Lactobacillus phage phiJB	species
4	1498212	Bacillus phage JBP901	no rank
4	1500814	Propionibacterium phage PHL095N00	no rank
4	1510155	Falconid herpesvirus 1	no rank
4	1527469	Bacillus phage Bobb	no rank
4	1538101	Small begomovirus-associated satellite	species
4	1542090	Pseudomonas phage vB_Pae_PS44	no rank
4	1580591	Sulfolobus monocaudavirus SMV2	species
4	159140	Buttonwillow virus	no rank
4	1654926	Escherichia phage HY03	no rank
4	1685783	Lake Sarah-associated circular virus-6	species
4	1715293	Aquatic bird bornavirus 1	no rank
4	1746072	Xingshan cricket virus	species
4	1792245	Bacillus phage Deep Blue	no rank
4	1805953	Bacillus phage Phrodo	species
4	1883370	Erwinia phage vB_EamM_Asesino	no rank
4	190061	Fowl aviadenovirus A	species
4	1912975	Mycobacterium phage DarthPhader	species
4	1923679	Wenzhou tombus-like virus 9	species
4	2005509	Centapoxvirus	genus
4	2010315	Chili leaf curl Sri Lanka betasatellite	species
4	2010331	Tomato leaf curl Bangalore betasatellite	species
4	2024213	Staphylococcus phage SN8	no rank
4	2025360	NY_014 poxvirus	species
4	2027252	Lactococcus phage LP9404	no rank
4	2053702	Raoultella phage Ro1	no rank
4	205908	Cypovirus 14	species
4	2070057	Vibrio phage Aphrodite1	no rank
4	2079134	Dishui lake phycodnavirus 1	species
4	208973	Choristoneura fumiferana multiple nucleopolyhedrovirus	species
4	2170140	Chaetoceros protobacilladnavirus 1	species
4	2250322	Gordonia phage NatB6	species
4	2489627	Pectobacterium phage Khlen	no rank
4	2502418	Mycobacterium phage AFIS	species
4	2546034	Fusarium redolens polymycovirus 1	species
4	2547425	Tenacibaculum phage PTm1	no rank
4	2560132	Fipvunavirus	genus
4	2593356	Streptomyces phage Braelyn	species
4	2653755	Mycobacterium phage Bryler	species
4	2656541	Gordonia phage Stormageddon	species
4	2732461	Alsuviricetes	class
4	273341	Ilesha virus	no rank
4	2756144	Bacillus phage Baseball_field	species
4	2772072	crAssphage cr112_1	species
4	2843435	Pippivirus	genus
4	2843436	Plateaulakevirus	genus
4	373410	Mycobacterium phage PBI1	no rank
4	396359	Clostridium phage phiSM101	species
4	40070	unclassified Chordopoxvirinae	no rank
4	414970	Enterobacteria phage cdtI	species
4	434309	Saffold virus	no rank
4	435486	Honeysuckle yellow vein beta-[Japan:Fukui:2001]	no rank
4	445683	Synechococcus phage S-ShM2	no rank
4	449133	Epizootic hemorrhagic disease virus (serotype 1 / strain New Jersey)	no rank
4	50294	Psittacid alphaherpesvirus 1	species
4	699370	Thermus phage TMA	species
4	74660	Choristoneura fumiferana DEF multiple nucleopolyhedrovirus	species
4	889873	Fathead minnow nidovirus	no rank
4	989895	Passion fruit green spot virus	species
3	1000646	Echarate virus	no rank
3	1141519	Escherichia phage phiKT	no rank
3	11866	Avian myeloblastosis virus	species
3	11867	Avian myelocytomatosis virus	species
3	12280	Tomato ringspot virus	species
3	1273738	Escherichia phage PBECO4	no rank
3	1398149	Eel picornavirus 1	no rank
3	1408137	Mobuck virus	species
3	1493513	Synechococcus phage ACG-2014i	species
3	1495866	Cat Que virus	no rank
3	1500386	Staphylococcus phage 6ec	no rank
3	1507984	Papaya leaf curl China betasatellite [China:Hainan:2014]	no rank
3	1567014	Clostridium phage phiCT9441A	species
3	1572712	Geobacillus virus E3	species
3	1589748	Achromobacter phage JWF	species
3	159138	Sabo virus	no rank
3	159147	Mermet virus	no rank
3	1608047	Huangpi Tick Virus 1	no rank
3	1623299	Phifelvirus	genus
3	1623688	Bat polyomavirus 6c	no rank
3	1675607	Klebsiella phage Matisse	no rank
3	1698439	Acinetobacter phage phiAB6	no rank
3	169865	Macroptilium yellow mosaic virus	species
3	1701824	Streptococcus phage phiARI0460-1	species
3	1708572	Phopivirus	no rank
3	1715288	Canary bornavirus 1	no rank
3	1715778	Simian adenovirus 16	serotype
3	1716044	Lymphocryptovirus Macaca/pfe-lcl-E3	no rank
3	1718606	Escherichia phage phiSUSP1	no rank
3	180252	Mardivirus	genus
3	181084	Prasinovirus	genus
3	1819678	Cucurbit yellow mosaic alphasatellite	species
3	1837876	Acinetobacter phage vB_AbaM_ME3	no rank
3	185750	Ageratum yellow vein betasatellite	species
3	1887314	Ranavirus maximus	no rank
3	1906245	Moku virus	species
3	1913112	Aeribacillus phage AP45	no rank
3	1922445	Beihai narna-like virus 18	species
3	1923536	Wenling picorna-like virus 8	species
3	1923721	Wuhan insect virus 17	species
3	1931113	Pea leaf distortion betasatellite	species
3	1983556	Pseudomonas phage PspYZU05	species
3	1983582	Pectobacterium phage vB_PatP_CB5	no rank
3	2023950	Bacillus phage KonjoTrouble	no rank
3	2029664	Lactococcus phage 51701	no rank
3	2034827	cardiovirus C1	no rank
3	2070186	Faecalibacterium phage FP_Taranis	no rank
3	2079290	Pseudomonas phage PollyC	no rank
3	2162642	Rhizoctonia solani endornavirus 1	species
3	2169600	Nclasvirinae	subfamily
3	2169670	Betatectivirus	genus
3	2282645	Panicum ecklonii-associated virus	species
3	2283031	Dickeya phage vB_DsoM_JA29	no rank
3	2283267	Streptomyces phage Wollford	no rank
3	2315616	Mycobacterium phage Saguaro	species
3	2496550	Escherichia phage SECphi27	no rank
3	2560202	Phimunavirus	genus
3	2713281	Salmonella phage bering	no rank
3	2733208	Samwavirus	genus
3	2772059	crAssphage cr50_1	species
3	2772080	crAssphage cr53_1	species
3	2842616	Copernicusvirus	genus
3	2842725	Hemphillvirus	genus
3	2843109	Usarudivirus	genus
3	2843380	Fernvirus	genus
3	292029	Staphylococcus virus G1	species
3	33763	Peanut mottle virus	species
3	345585	Invertebrate iridescent virus 30	no rank
3	362830	Artogeia rapae granulovirus	species
3	36363	Lymphocystis disease virus 1	species
3	376820	Mannheimia virus PHL101	species
3	390436	Corchorus golden mosaic virus	species
3	410826	Potato apical leaf curl disease-associated satellite DNA beta	species
3	447606	Alternanthera yellow vein betasatellite	species
3	529380	Chondrostereum purpureum cryptic virus 1	species
3	707546	Porcine parvovirus 4	no rank
3	754042	Synechococcus phage S-SKS1	no rank
3	755272	Micromonas pusilla virus 12T	species
3	758677	Raspberry vein chlorosis virus	no rank
3	78541	Streptococcus virus Sfi11	species
2	10284	Entomopoxvirinae	subfamily
2	1034150	Mycobacterium virus Yoshi	species
2	104581	St Croix River virus	species
2	1128071	Clostridium phage phi24R	no rank
2	1141133	Bacillus phage B4	no rank
2	11764	Baboon endogenous virus strain M7	no rank
2	1204516	Aeromonas phage CC2	no rank
2	12162	Citrus tristeza virus	species
2	12205	Papaya ringspot virus	species
2	1283077	Pelagibacter phage HTVC010P	species
2	1382932	Bacillus phage Troll	no rank
2	1406785	Bacillus phage Grass	no rank
2	1416741	Sea otter poxvirus	no rank
2	1486660	Bacillus phage Hoody T	no rank
2	1498188	Propionibacterium phage Pacnes 2012-15	no rank
2	1500734	Lactobacillus phage Ld25A	no rank
2	1560346	Simian adenovirus DM-2014	serotype
2	159143	Facey's Paddock virus	no rank
2	1610831	Staphylococcus phage IME-SA2	no rank
2	1663210	Ostreococcus mediterraneus virus 1	species
2	1680908	Salmon gill poxvirus	no rank
2	1690818	Streptomyces phage SF3	species
2	1691958	Brevibacillus phage Sundance	species
2	172653	Ictalurivirus	genus
2	1776293	Bacillus phage Eldridge	no rank
2	1805956	Bacillus phage Zuko	species
2	1852628	Morganella phage vB_MmoM_MP1	species
2	1853762	Jasmine virus C	species
2	1868826	Bacillus phage vB_BtS_BMBtp14	no rank
2	1881013	Senna mosaic virus	species
2	1895333	Sulfolobus islandicus rudivirus 3	species
2	1921016	Nitunavirus	genus
2	1922348	unclassified RNA viruses ShiM-2016	no rank
2	1922730	Beihai tombus-like virus 9	species
2	1923358	Sanxia atyid shrimp virus 4	no rank
2	1986290	Clostera anastomosis granulovirus B	species
2	2010317	Ageratum yellow vein Sri Lanka betasatellite	species
2	2033721	Tomato yellow leaf curl Yunnan betasatellite	species
2	2041515	Gordonia phage Patio	species
2	2047867	Arthrobacter phage Urla	species
2	2052651	Vombatid gammaherpesvirus 1	species
2	2072024	Mocis latipes granulovirus	species
2	2099637	Mycobacterium phage Mendokysei	species
2	2182360	Gordonia phage Jace	no rank
2	220813	Zinnia leaf curl virus-associated DNA beta	species
2	2219092	Sclerotinia sclerotiorum deltaflexivirus 2	species
2	2267403	Vibrio phage YC	no rank
2	2268578	Synechococcus phage S-T4	no rank
2	2340717	Escherichia phage C5	no rank
2	2482952	Pneumovirus dog/Bari/100-12/ITA/2012	no rank
2	2495554	Staphylococcus phage SP197	no rank
2	2501368	Thottimvirus	genus
2	2510942	Lactobacillus phage 521B	no rank
2	2517965	Mycobacterium phage Pinnie	species
2	2530024	Fusobacterium phage Fnu1	no rank
2	2560070	Bastillevirinae	subfamily
2	2560094	Asteriusvirus	genus
2	2560319	Avian orthoavulavirus 1	species
2	2587814	Serratia phage Moabite	no rank
2	2589652	Escherichia phage Henu7	species
2	2654972	Vibrio phage phi50-12	species
2	268746	Prochlorococcus phage P-SSM2	no rank
2	2733152	Bertelyvirus	genus
2	273810	Eriocheir sinensis reovirus	species
2	2740802	uncultured phage_MedDCM-OCT-S28-C3	no rank
2	2741077	uncultured phage_MedDCM-OCT-S28-C10	no rank
2	2772071	crAssphage cr111_1	species
2	2772092	crAssphage cr130_1	species
2	2776735	Aeromonas phage BUCT551	species
2	2843416	Leicestervirus	genus
2	2844217	Escherichia virus P2-2H1	species
2	325676	Nam Dinh virus	no rank
2	32629	Indian peanut clump virus	species
2	340435	Microcystis virus Ma-LMM01	species
2	345198	Invertebrate iridescent virus 22	species
2	346881	Acidianus filamentous virus 3	species
2	355246	Escherichia virus Rtp	species
2	366686	TYLCCNV-[Y322] satellite DNA beta	species
2	372457	Streptococcus phage M102	species
2	374422	Streptomyces virus TG1	species
2	376852	Goatpox virus Pellor	no rank
2	447909	Geobacillus virus E2	species
2	649890	Broad bean true mosaic virus	species
2	745088	Leuconostoc phage 1-A4	no rank
2	82676	Omikronpapillomavirus 1	species
2	880158	unclassified Prasinovirus	no rank
2	979535	Vibrio phage ICP3	no rank
1	10256	Raccoonpox virus	species
1	1054968	Salmonella phage 7-11	species
1	10600	Human papillomavirus type 6b	serotype
1	1091052	Dickeya virus Limestone	species
1	10942	Human rotavirus B	no rank
1	110456	Teseptimavirus	genus
1	11157	Mononegavirales	order
1	11290	Infectious hematopoietic necrosis virus	no rank
1	114777	Natrialba phage PhiCh1	no rank
1	1150989	Vibrio phage pVp-1	no rank
1	1173748	Listeria phage LP-110	no rank
1	11834	RD114 retrovirus	species
1	119756	Rhesus macaque parvovirus	no rank
1	1198140	Felixounavirus	genus
1	1211644	Caulobacter virus Swift	species
1	1225644	Bhendi yellow vein mosaic virus-associated alphasatellite	species
1	1234171	Sauropus leaf curl disease associated DNA beta	species
1	1239383	Staphylococcus phage JD007	no rank
1	1247113	Astrovirus VA4	species
1	1249677	Heterobasidion partitivirus 8	species
1	1255765	Tomato yellow leaf curl China betasatellite	species
1	1264700	Edwardsiella phage MSW-3	no rank
1	1273753	Halorubrum Tailed Virus 5	species
1	1285382	Bacillus phage SIOphi	no rank
1	129950	Bovine mastadenovirus B	species
1	1308859	Drosophila affinis sigmavirus	species
1	1327968	Cellulophaga phage phi48:2	species
1	140410	Peduovirus	genus
1	1406816	Zucchini tigre mosaic virus	species
1	1415147	Xylella phage Salvo	no rank
1	145579	Bdellovibrio phage phiMH2K	no rank
1	148879	Banana mild mosaic virus	species
1	1529392	Caprine parainfluenza virus 3	no rank
1	153057	Alpharetrovirus	genus
1	1567011	Clostridium phage phiCT19406C	species
1	1567453	Lactobacillus phage LfeSau	species
1	1608045	Changping Tick Virus 3	no rank
1	1623285	Corndogvirus	genus
1	1633187	Laibin virus	no rank
1	1647305	Mycobacterium phage Cambiare	species
1	1654919	Pseudoalteromonas phage H101	no rank
1	1675602	Citrobacter phage Merlin	no rank
1	1678225	Catu virus	no rank
1	1685735	Lake Sarah-associated circular virus-1	species
1	1685767	Lake Sarah-associated circular virus-39	species
1	1689679	Ralstonia phage RSF1	no rank
1	1692247	Didemnum sp. Sea Squirt associated virus	species
1	1698451	Bacillus phage AvesoBmore	no rank
1	1720526	Golden Marseillevirus	species
1	174178	Citrus yellow mosaic virus	species
1	1780507	Myotis gammaherpesvirus 8	species
1	1784956	Mycobacterium phage Bactobuster	species
1	1792032	Bacillus phage SP-15	no rank
1	1867125	Cutavirus	no rank
1	1868595	Clostridium phage CDKM15	no rank
1	1873698	Pteropox virus	species
1	1881383	Vibrio phage 1.097.O._10N.286.49.B3	no rank
1	1903318	Primate norovirus	species
1	1910937	Bacillus virus Bp8pC	species
1	1912143	Biquartavirus	genus
1	1920753	Gamaleyavirus	genus
1	1920762	Litunavirus	genus
1	1922385	Beihai hepe-like virus 8	species
1	1922540	Beihai picorna-like virus 111	species
1	1922724	Beihai tombus-like virus 3	species
1	1922787	Changjiang picorna-like virus 14	species
1	1922934	Hubei myriapoda virus 5	no rank
1	1923696	Wuhan coneheads virus 2	species
1	1923889	Ralstonia phage RP12	no rank
1	1958922	Staphylococcus phage St 134	no rank
1	1970374	Acinetobacter phage Loki	no rank
1	1980429	Pigeonpea sterility mosaic emaravirus 1	species
1	1982243	Incheonvrus	genus
1	1987479	Choristoneura murinana nucleopolyhedrovirus	species
1	1987509	Ranid herpesvirus 3	species
1	2010248	Torque teno indri virus 1	no rank
1	2010283	Wilkie partiti-like virus 1	species
1	2010329	Acidovorax phage ACP17	no rank
1	2010332	Tomato leaf curl Laguna betasatellite	species
1	2015441	Tomato chlorotic leaf curl virus	species
1	2015804	Acinetobacter phage AbP2	no rank
1	2029669	Lactococcus phage 62605	no rank
1	2034762	Sweet potato pakakuy virus	species
1	2041212	Klebsiella phage vB_KpnM_KpV79	no rank
1	2047801	Escherichia phage VB_EcoS-Golestan	no rank
1	2048976	Pseudomonas phage inbricus	no rank
1	2052742	Yersinia phage fHe-Yen9-04	no rank
1	2116384	Guangdong red-banded snake torovirus	species
1	2169824	Cleome leaf crumple alphasatellite	species
1	2170143	Chaetoceros protobacilladnavirus 4	species
1	2170408	Apodemus flavicollis polyomavirus 1	species
1	2182400	Microbacterium phage Paschalis	species
1	218845	Tobacco leaf curl Yunnan betasatellite	species
1	2201462	Pseudomonas phage PFP1	no rank
1	2204151	unclassified DNA viruses	no rank
1	2283271	Caulobacter phage CcrPW	no rank
1	2304025	Cryptophlebia peltastica nucleopolyhedrovirus	species
1	2340716	Escherichia phage C1	species
1	234829	Tomato begomovirus satellite DNA beta	species
1	2480172	Cragig virus 1	species
1	2499242	Caaingua virus	species
1	2501774	unclassified Mimivirus	no rank
1	2575325	Salmonella phage SE13	no rank
1	2587809	Klebsiella phage Marfa	no rank
1	2601643	Erwinia phage pEp_SNUABM_01	no rank
1	2613861	unclassified Tospoviridae	no rank
1	2675238	Lactococcus phage CHPC116	no rank
1	2696397	Escherichia phage flopper	no rank
1	2713297	Salmonella phage faergetype	no rank
1	2719594	Enterococus phage vipetofem	species
1	2725629	Streptomyces phage Bmoc	species
1	2733196	Montyvirus	genus
1	273350	Wyeomyia orthobunyavirus	species
1	2736192	Shigella virus 2019SD1	species
1	2758131	bat polyomavirus 2a	no rank
1	2759725	Ralstonia phage Firinga	no rank
1	2772076	crAssphage cr128_1	species
1	2780070	UAG-readthrough crAss clade	clade
1	2842946	Peeveelvirus	genus
1	2843370	Coventryvirus	genus
1	2843412	Lambovirus	genus
1	2843478	Yonseivirus	genus
1	31537	Lactococcus virus c2	species
1	31612	Adelaide River virus	no rank
1	318558	Tupaia virus	no rank
1	318836	Kotonkan virus	no rank
1	326941	Raspberry leaf mottle virus	species
1	333923	Human papillomavirus 5	serotype
1	373862	Siniperca chuatsi rhabdovirus	species
1	373996	Micromonas pusilla virus SP1	species
1	45103	Oat golden stripe virus	species
1	491893	Abalone shriveling syndrome-associated virus	species
1	536466	Synechococcus phage S-SSM4	species
1	546807	Mycobacterium phage ScottMcG	no rank
1	555387	Synechococcus phage S-RSM4	species
1	558690	Cucurbit chlorotic yellows virus	species
1	562742	Roseobacter phage RDJL Phi 1	no rank
1	573175	Vibrio phage martha 12B12	species
1	627584	Bat astrovirus Tm/Guangxi/LD71/2007	no rank
1	632112	Lactobacillus virus Lb338-1	species
1	656025	Gossypium darwinii symptomless alphasatellite	species
1	663241	Enterococcus phage phiEf11	species
1	682370	Streptococcus virus ALQ132	species
1	687371	Torque teno mini virus 3	species
1	69576	Ovine enzootic nasal tumor virus	species
1	69973	Closteroviridae	family
1	71972	Beet virus Q	species
1	760939	Acinetobacter phage Acj9	no rank
1	864178	Clostridium phage phiCD6356	species
1	883876	Luna mammarenavirus	species
1	905055	Tobacco leaf curl PUSA alphasatellite	species
1	999883	Lausannevirus	species

## Sheet: DIAMOND
reads	taxID	taxName	rank
26624	67082	BeAn 58058 virus	species
19486	166122	Human endogenous retrovirus K113	no rank
9962	153135	Gammaretrovirus	genus
6349	140052	Betaretrovirus	genus
4424	327045	Orthoretrovirinae	subfamily
3268	1822365	Bovine retrovirus CH15	species
1809	10239	Viruses	superkingdom
1220	153057	Alpharetrovirus	genus
1208	11636	Reticuloendotheliosis virus	species
979	2732523	Megaviricetes	class
965	2079134	Dishui lake phycodnavirus 1	species
955	10494	Lymphocystivirus	genus
756	256729	Lymphocystis disease virus - isolate China	species
618	11768	Feline leukemia virus	species
601	11757	Mouse mammary tumor virus	species
539	1898060	Lymphocystis disease virus Sa	species
488	11764	Baboon endogenous virus strain M7	no rank
480	353769	unclassified Gammaretrovirus	no rank
452	11788	Abelson murine leukemia virus	species
445	347957	unclassified Betaretrovirus	no rank
427	11801	Moloney murine leukemia virus	no rank
422	348296	Atlantic salmon swim bladder sarcoma virus	species
402	2732007	Nucleocytoviricota	phylum
381	11856	Squirrel monkey retrovirus	species
358	549779	Mimiviridae	family
319	2023057	Orpheovirus IHUMI-LCC2	species
311	2060084	Pandoravirus	genus
307	1535247	Saimiriine betaherpesvirus 4	species
306	153137	Epsilonretrovirus	genus
304	11786	Murine leukemia virus	species
303	10485	Bracovirus	genus
292	11855	Mason-Pfizer monkey virus	species
285	455364	Chrysochromulina ericina virus	species
272	1904439	Simian retrovirus 8	species
270	10501	Phycodnaviridae	family
260	11632	Retroviridae	family
260	2704413	Lymphocystis disease virus 4	species
257	11777	Feline sarcoma virus (STRAIN HARDY-ZUCKERMAN 4)	no rank
255	11834	RD114 retrovirus	species
241	11807	Harvey murine sarcoma virus	species
195	1474867	Aureococcus anophagefferens virus	species
187	394239	Koala retrovirus	species
186	10292	Herpesviridae	family
185	10241	Chordopoxvirinae	subfamily
185	345690	unclassified Lymphocystivirus	no rank
184	693272	Cafeteria roenbergensis virus BV-PW1	no rank
183	327046	Spumaretrovirinae	subfamily
176	10260	Avipoxvirus	genus
169	10280	Molluscum contagiosum virus subtype 1	no rank
154	11885	Fujinami sarcoma virus	species
152	10358	Cytomegalovirus	genus
151	257816	Cotesia glomerata bracovirus	species
145	2169727	Dioscorea bacilliform RT virus 1	species
135	109981	Diachasmimorpha longicaudata entomopoxvirus	no rank
134	10381	Saimiriine gammaherpesvirus 2	species
132	11840	Gibbon ape leukemia virus	species
121	723802	Simian retrovirus 4	species
120	10385	Bovine gammaherpesvirus 4	species
120	11884	Y73 sarcoma virus	species
119	212035	Acanthamoeba polyphaga mimivirus	species
113	880158	unclassified Prasinovirus	no rank
110	153136	Deltaretrovirus	genus
110	239365	Enzootic nasal tumour virus of goats	species
102	11830	Murine osteosarcoma virus	species
98	11970	Woolly monkey sarcoma virus	species
93	2169666	Felispumavirus	genus
91	2733104	Eurybiavirus	genus
90	1697349	Scale drop disease virus	species
90	64461	Walleye epidermal hyperplasia virus 2	species
88	880159	Bathycoccus sp. RCC1105 virus BpV1	no rank
86	548689	Proboscivirus	genus
85	39720	Walleye dermal sarcoma virus	species
84	755272	Micromonas pusilla virus 12T	species
81	11746	Jaagsiekte sheep retrovirus	species
80	354090	UR2 sarcoma virus	species
77	158683	Diadromus pulchellus ascovirus 4a	no rank
75	11878	Avian sarcoma virus CT10	species
70	2170201	Squirrel monkey simian foamy virus	species
69	39640	Cotesia congregata bracovirus	species
68	181082	Emiliania huxleyi virus 86	species
67	317878	Cyprinid herpesvirus 2	species
65	146015	Elephantid betaherpesvirus 1	species
62	11809	Moloney murine sarcoma virus	species
62	558016	Alphabaculovirus	genus
62	944644	Marseilleviridae	family
61	11676	Human immunodeficiency virus 1	species
61	692606	Cyprinivirus	genus
59	353825	unclassified Alpharetrovirus	no rank
59	69576	Ovine enzootic nasal tumor virus	species
58	10662	Myoviridae	family
56	1269028	Acanthamoeba polyphaga moumouvirus	no rank
53	111874	Neodiprion sertifer nucleopolyhedrovirus	species
52	50292	Cercopithecine betaherpesvirus 5	species
49	2017756	Alphairidovirinae	subfamily
48	1586715	Yellowstone lake phycodnavirus 3	species
47	1094892	Megavirus chiliensis	species
47	62099	Anomala cuprea entomopoxvirus	species
46	1128424	Helicoverpa zea nudivirus 2	no rank
46	204507	Neodiprion abietis NPV	species
46	72201	Armadillidium vulgare iridescent virus	no rank
46	768738	Elephant endotheliotropic herpesvirus 5	species
45	10442	Baculoviridae	family
44	11095	Pestivirus	genus
44	251749	Phaeocystis globosa virus	species
41	111469	Retroperitoneal fibromatosis-associated herpesvirus	no rank
40	2022783	Common bottlenose dolphin gammaherpesvirus 1 strain Sarasota	species
39	317858	Cyprinid herpesvirus 1	species
38	44088	Canarypox virus	species
36	315393	Mimivirus	genus
36	336486	Turkeypox virus	species
36	50290	Aotine betaherpesvirus 1	species
35	558018	Gammabaculovirus	genus
34	1605972	Cricetid gammaherpesvirus 2	species
34	181083	Chlorovirus	genus
32	1780507	Myotis gammaherpesvirus 8	species
32	548914	Elephant endotheliotropic herpesvirus 4	species
31	10374	Gammaherpesvirinae	subfamily
31	2070181	Faecalibacterium phage FP_Brigit	no rank
29	181084	Prasinovirus	genus
29	40270	Snakehead retrovirus	species
28	2107708	Pandoravirus neocaledonia	species
28	2170197	Guenon simian foamy virus	species
27	1815511	Lactobacillus phage PLE2	no rank
27	64462	Walleye epidermal hyperplasia virus 1	species
26	1504288	Bovine gammaherpesvirus 6	species
26	2059380	Flamingopox virus FGPVKD09	species
23	11886	Rous sarcoma virus	species
23	1329402	Eptesipox virus	species
23	322019	Acanthocystis turfacea chlorella virus 1	species
23	558017	Betabaculovirus	genus
22	10379	Rhadinovirus	genus
22	11901	Bovine leukemia virus	species
22	1873698	Pteropox virus	species
21	12657	Equid gammaherpesvirus 2	species
21	1622024	Desmodus rotundus endogenous retrovirus	species
21	2052899	Cladosporium fulvum T-1 virus	species
21	53988	Microplitis demolitor bracovirus	species
20	180170	Infectious spleen and kidney necrosis virus	species
20	1903266	Cedratvirus A11	species
20	92521	Oryctes rhinoceros nudivirus	species
19	1513458	Marseillevirus	genus
19	2731643	Autographiviridae	family
18	10371	Equid gammaherpesvirus 5	species
18	240594	Endogenous langur type D retrovirus PO-1-Lu	no rank
18	353768	Chick syncytial virus	species
18	37665	Ectocarpus siliculosus virus 1	species
17	10242	Orthopoxvirus	genus
17	116759	Glyptapanteles indiensis bracovirus	species
17	11866	Avian myeloblastosis virus	species
16	10491	Chloriridovirus	genus
16	11795	Friend murine leukemia virus	no rank
16	132475	Yaba-like disease virus	no rank
15	150286	Anguillid herpesvirus 1	species
15	1680908	Salmon gill poxvirus	no rank
15	305674	Deerpox virus W-848-83	no rank
14	129727	Bovine papular stomatitis virus	species
14	1663209	Ostreococcus lucimarinus virus 7	species
14	176652	Invertebrate iridescent virus 6	species
14	1917232	Only Syngen Nebraska virus 5	species
14	83191	Melanoplus sanguinipes entomopoxvirus	species
13	1416741	Sea otter poxvirus	no rank
13	2169561	Ortervirales	order
13	249151	Neodiprion lecontei nucleopolyhedrovirus	species
13	318279	Human T-lymphotropic virus 4	species
13	548688	Percavirus	genus
12	11709	Human immunodeficiency virus 2	species
12	1261657	Murid betaherpesvirus 8	species
12	1826170	Tokyovirus A1	species
12	2107707	Pandoravirus macleodensis	species
12	2560801	Testudinid alphaherpesvirus 3	species
12	28873	Camelpox virus	species
11	1241371	Abalone herpesvirus Victoria/AUS/2009	no rank
11	1678078	Mollivirus sibericum	species
11	1955558	Noumeavirus	species
11	2840070	Lefavirales	order
10	10282	Yatapoxvirus	genus
10	10375	Lymphocryptovirus	genus
10	10652	Badnavirus	genus
10	1434720	Beluga whale alphaherpesvirus 1	no rank
10	1459800	Hibiscus bacilliform virus GD1	species
10	1493511	Synechococcus phage ACG-2014f	no rank
10	2249313	Phascolarctid gammaherpesvirus 1	species
10	2732555	Pimascovirales	order
10	345201	Invertebrate iridescent virus 3	species
9	11867	Avian myelocytomatosis virus	species
9	1572712	Geobacillus virus E3	species
9	196896	unclassified Myoviridae	no rank
9	2072209	Esparto virus	no rank
9	207343	Bovine foamy virus	species
9	240426	Squirrelpox virus	species
9	262175	Plodia interpunctella granulovirus	species
9	340921	Kelp fly virus	species
8	1293572	Mythimna separata entomopoxvirus 'L'	no rank
8	1546257	Tipula oleracea nudivirus	species
8	1586714	Yellowstone lake phycodnavirus 2	species
8	1932881	Pacmanvirus A23	species
8	2005509	Centapoxvirus	genus
8	307444	Erinnyis ello granulovirus	species
8	573174	Vibrio phage henriette 12B8	species
8	880162	Ostreococcus lucimarinus virus 1	species
7	10257	Parapoxvirus	genus
7	10286	Betaentomopoxvirus	genus
7	10506	Paramecium bursaria Chlorella virus 1	species
7	11646	Lentivirus	genus
7	1392231	Streptococcus phage 20617	species
7	2014434	Escherichia phage D6	species
7	2052651	Vombatid gammaherpesvirus 1	species
7	28321	Amsacta moorei entomopoxvirus	species
7	35249	unclassified Gammaherpesvirinae	no rank
6	100217	Epizootic haematopoietic necrosis virus	species
6	10293	Alphaherpesvirinae	subfamily
6	10492	Ranavirus	genus
6	119222	Pestivirus giraffe-1 H138	no rank
6	12429	unclassified viruses	no rank
6	180230	Cyprinid herpesvirus 3	species
6	1882382	Sea otter parvovirus 1	species
6	2772069	crAssphage cr108_1	species
6	359919	Spodoptera litura granulovirus	species
6	381899	Paramecium bursaria Chlorella virus A1	species
6	647294	Sweet potato badnavirus B	species
6	97195	Heterosigma akashiwo virus 01	species
5	10261	Fowlpox virus	species
5	10464	Agrotis segetum granulovirus	species
5	10487	Iridovirus	genus
5	10497	African swine fever virus	species
5	10699	Siphoviridae	family
5	107324	Tobacco vein clearing virus	species
5	1084719	Bacillus virus G	species
5	123630	Macaca nemestrina rhadinovirus 2	no rank
5	1450746	Pithovirus sibericum	species
5	1542477	Prochlorococcus phage P-TIM68	species
5	1691954	Brevibacillus phage Jenst	no rank
5	1720526	Golden Marseillevirus	species
5	1797140	Acidianus tailed spindle virus	species
5	1859492	Kaumoebavirus	species
5	188763	Panine betaherpesvirus 2	species
5	1919083	Cynomolgus cytomegalovirus	species
5	2169611	Brujitavirus	genus
5	929832	Cyanophage P-RSM6	species
4	10264	Pigeonpox virus	species
4	1070409	Human papillomavirus 136	serotype
4	1150991	Sphingomonas phage PAU	species
4	11665	Equine infectious anemia virus	species
4	11958	Avian carcinoma virus	species
4	1278402	Cyanophage S-RIM12	species
4	1307956	Leucania separata nucleopolyhedrovirus	species
4	1307957	Clanis bilineata nucleopolyhedrovirus	species
4	1421067	Tunisvirus fontaine2	no rank
4	1619899	Dioscorea bacilliform AL virus	species
4	170617	Adoxophyes orana granulovirus	species
4	1922327	Wphvirus	genus
4	2016402	Southwest carpet python virus	no rank
4	2024264	Agrobacterium phage Atu_ph07	no rank
4	2169668	Simiispumavirus	genus
4	2200830	Akhmeta virus	species
4	224399	Adoxophyes honmai nucleopolyhedrovirus	species
4	2250336	Streptomyces phage Blueeyedbeauty	no rank
4	231992	Feldmannia irregularis virus a	species
4	268746	Prochlorococcus phage P-SSM2	no rank
4	2731650	Molineuxvirinae	subfamily
4	2732005	Bamfordvirae	kingdom
4	2732970	Harbinvirus	genus
4	2733124	Phapecoctavirus	genus
4	2842796	Kenoshavirus	genus
4	2843478	Yonseivirus	genus
4	28883	Caudovirales	order
4	33747	Simian T-lymphotropic virus 1	no rank
4	33748	Simian T-lymphotropic virus 2	no rank
4	399781	Paramecium bursaria Chlorella virus FR483	no rank
4	42882	Cherry virus A	species
4	481147	Simian T-cell lymphotropic virus 6	species
4	481315	Leporid alphaherpesvirus 4	species
4	490711	Orgyia leucostigma nucleopolyhedrovirus	species
4	762660	Acinetobacter phage Ac42	species
3	1007869	Rhodococcus phage E3	species
3	10240	Poxviridae	family
3	10256	Raccoonpox virus	species
3	10258	Orf virus	species
3	10265	Capripoxvirus	genus
3	10319	Varicellovirus	genus
3	10334	Felid alphaherpesvirus 1	species
3	1038068	PreXMRV-1	no rank
3	10397	Tupaiid betaherpesvirus 1	species
3	10454	Spodoptera exigua multiple nucleopolyhedrovirus	species
3	1046267	Operophtera brumata nucleopolyhedrovirus	species
3	10486	Iridoviridae	family
3	1079999	Synechococcus phage metaG-MbCM1	species
3	114777	Natrialba phage PhiCh1	no rank
3	1168280	Cronobacter phage phiES15	species
3	11908	Human T-cell leukemia virus type I	no rank
3	1349410	Pandoravirus salinus	species
3	1548713	Psittaciform 1 orthobornavirus	species
3	1592576	Condylorrhiza vestigialis MNPV	species
3	1605721	Pandoravirus inopinatum	species
3	1608255	Suid betaherpesvirus 2	species
3	1642929	Lambdina fiscellaria nucleopolyhedrovirus	species
3	1663210	Ostreococcus mediterraneus virus 1	species
3	1815582	Pseudomonas phage phiPMW	no rank
3	1887214	Bos taurus papillomavirus 16	no rank
3	1923338	Hubei virga-like virus 23	species
3	2023203	Pithoviridae	family
3	2025359	Murmansk poxvirus	no rank
3	2315721	Spodoptera eridania nucleopolyhedrovirus	species
3	2565510	Microbacterium phage Akoni	no rank
3	2686231	Mycobacterium phage BirdsNest	species
3	2731360	Heunggongvirae	kingdom
3	2733153	Colossusvirus	genus
3	2733295	Macropopoxvirus	genus
3	307461	Apocheima cinerarium nucleopolyhedrovirus	species
3	35246	Cercopithecine alphaherpesvirus 9	species
3	35252	Alcelaphine gammaherpesvirus 1	species
3	38804	Yaba monkey tumor virus	species
3	445683	Synechococcus phage S-ShM2	no rank
3	523798	Cotesia flavipes bracovirus	species
3	622438	Duck astrovirus C-NGB	no rank
3	694581	Marseillevirus marseillevirus	species
3	979525	Vibrio phage ICP1	species
3	999883	Lausannevirus	species
2	10359	Human betaherpesvirus 5	species
2	10482	Polydnaviridae	family
2	109270	Equine foamy virus	species
2	11307	Sonchus yellow net nucleorhabdovirus	species
2	1147094	Klebsiella phage vB_KleM_RaK2	no rank
2	1147140	Salmonella phage SPN3UB	species
2	11657	Bovine immunodeficiency virus	species
2	11660	Caprine arthritis encephalitis virus	species
2	11673	Feline immunodeficiency virus	species
2	12162	Citrus tristeza virus	species
2	1235654	Propionibacterium phage PHL112N00	no rank
2	128706	Haloviruses	clade
2	1298633	Aichivirus C	species
2	1349409	Pandoravirus dulcis	species
2	1357715	Microcystis phage MaMV-DC	no rank
2	1367203	Hemileuca sp. nucleopolyhedrovirus	no rank
2	1419109	Harp seal herpesvirus	no rank
2	1458716	Vibrio phage CHOED	species
2	157270	Gooseberry vein banding associated virus	species
2	1586713	Yellowstone lake phycodnavirus 1	species
2	1623278	Bronvirus	genus
2	1667587	Papio ursinus cytomegalovirus	no rank
2	1714377	Bottlenose dolphin adenovirus 1	serotype
2	172861	Fowl aviadenovirus 5	no rank
2	181085	Phaeovirus	genus
2	1813599	Brazilian marseillevirus	species
2	1880590	Tenacibaculum phage pT24	no rank
2	1881263	Vibrio phage 1.204.O._10N.222.46.F12	no rank
2	1885248	Variegated squirrel bornavirus 1	no rank
2	1932713	Aeropyrum globular virus 1	species
2	2010329	Acidovorax phage ACP17	no rank
2	2053981	Tomelloso virus	no rank
2	2107709	Pandoravirus quercus	species
2	2170200	Spider monkey simian foamy virus	species
2	2175117	Rhynchobatus djiddensis adomavirus 1	species
2	2283286	Gordonia phage Daredevil	no rank
2	2493123	Sulfolobales Beppu filamentous virus 2	no rank
2	2560777	Spheniscid alphaherpesvirus 1	species
2	2562661	unclassified Fromanvirus	no rank
2	2593638	Bacillus phage vB_BmeM-Goe8	no rank
2	2725629	Streptomyces phage Bmoc	species
2	2731937	Ermolevavirus	genus
2	2733139	Vellamovirus	genus
2	2772059	crAssphage cr50_1	species
2	2801477	Flavobacterium phage vB_FspM_immuto_2-6A	species
2	2843401	Klausavirus	genus
2	2843450	Sarumanvirus	genus
2	2847058	Escherichia phage 2H10	no rank
2	36370	Jembrana disease virus	species
2	39101	Simian T-lymphotropic virus 3	no rank
2	419435	Glypta fumiferanae ichnovirus	species
2	44561	Murine type C retrovirus	no rank
2	445688	Prochlorococcus phage P-SSM7	no rank
2	455363	unclassified Phycodnaviridae	no rank
2	459770	Diplodia scrobiculata RNA virus 1	species
2	499235	Halomonas virus HAP1	species
2	508441	Ictalurid herpesvirus 2	species
2	58094	Choristoneura rosaceana nucleopolyhedrovirus	species
2	59504	Petunia vein clearing virus	species
2	667093	Broome virus	species
2	683735	Aggregatibacter phage S1249	species
2	74320	Buzura suppressaria nucleopolyhedrovirus	species
2	74660	Choristoneura fumiferana DEF multiple nucleopolyhedrovirus	species
2	754042	Synechococcus phage S-SKS1	no rank
2	930275	Cotia virus SPAn232	no rank
2	93465	Avian endogenous retrovirus EAV-HP	species
2	941970	Liberibacter phage SC2	species
1	10255	Variola virus	species
1	10270	Leporipoxvirus	genus
1	10271	Rabbit fibroma virus	species
1	10276	Swinepox virus	species
1	10294	Simplexvirus	genus
1	10335	Human alphaherpesvirus 3	species
1	10357	Betaherpesvirinae	subfamily
1	10449	Lymantria dispar multiple nucleopolyhedrovirus	species
1	10456	Spodoptera littoralis nucleopolyhedrovirus	species
1	10663	Tequatrovirus	genus
1	1070324	Bos taurus papillomavirus 12	serotype
1	1076255	Yokapox virus	species
1	10989	Maize rough dwarf virus	species
1	1109712	Rhodococcus phage REQ1	species
1	11819	Spleen focus-forming virus	species
1	1198136	Tevenvirinae	subfamily
1	1198980	Pbunavirus	genus
1	1206557	Yersinia phage phiR2-01	no rank
1	1283079	Pelagibacter phage HTVC019P	no rank
1	1293540	Adoxophyes honmai entomopoxvirus 'L'	no rank
1	129953	Bovine mastadenovirus A	species
1	1325731	Flavobacterium phage 6H	no rank
1	1340709	Mycobacterium phage Redno2	species
1	137443	Macropodid alphaherpesvirus 1	species
1	137757	Ipomovirus	genus
1	1432135	Lamium mild mosaic virus	species
1	1452540	Felis catus gammaherpesvirus 1	no rank
1	1465751	Anopheles minimus iridovirus	species
1	148363	Helicoverpa armigera nucleopolyhedrovirus G4	no rank
1	1500757	Pseudomonas phage phiPSA1	species
1	1510155	Falconid herpesvirus 1	no rank
1	1527514	Escherichia phage EK99P-1	no rank
1	1542498	Lelliottia phage phD2B	no rank
1	1563660	Sucra jujuba nucleopolyhedrovirus	species
1	1563661	Delftia phage RG-2014	no rank
1	1579460	Parapoxvirus red deer/HL953	no rank
1	1623281	Cheoctovirus	genus
1	1628721	Acinetobacter phage YMC11/11/R3177	no rank
1	1629132	Graminella nigrifrons virus 1	species
1	1636201	Burkholderia phage AP3	no rank
1	166921	Lymantria xylina nucleopolyhedrovirus	species
1	1682340	Human papillomavirus 201	serotype
1	1689679	Ralstonia phage RSF1	no rank
1	173707	Temperate phage phiNIH1.1	species
1	1750712	Cnaphalocrocis medinalis granulovirus	species
1	1796996	Arthrobacter phage Kitkat	no rank
1	1813598	unclassified Marseillevirus	no rank
1	1857099	Salmonella phage BPS11Q3	species
1	186764	Fromanvirus	genus
1	187984	Seal parapoxvirus	no rank
1	1883369	Synechococcus phage S-CAM9	no rank
1	1885571	Rat parvovirus 2	no rank
1	1891703	Mycobacterium phage Tonenili	species
1	190065	Fowl aviadenovirus E	species
1	1908811	Ceratobasidium endornavirus G	species
1	1912143	Biquartavirus	genus
1	1922789	Changjiang picorna-like virus 16	species
1	1923889	Ralstonia phage RP12	no rank
1	1925779	Nankokuvirus	genus
1	1933063	Bacillus phage vB_BsuM-Goe3	no rank
1	1940555	Murine roseolovirus	species
1	194440	Primate T-lymphotropic virus 1	species
1	194960	Kobuvirus	genus
1	1958956	Erwinia phage vB_EamM_Yoloswag	no rank
1	1962671	Serratia phage BF	no rank
1	1982106	Demosthenesvirus	genus
1	1985303	Mooglevirus	genus
1	1987479	Choristoneura murinana nucleopolyhedrovirus	species
1	2025360	NY_014 poxvirus	species
1	2047782	Escherichia phage PGT2	no rank
1	2059880	Streptomyces phage AbbeyMikolon	no rank
1	2072024	Mocis latipes granulovirus	species
1	2079290	Pseudomonas phage PollyC	no rank
1	2099448	Mycobacterium phage Ruotula	species
1	2100130	Synechococcus virus S-PRM1	species
1	2169726	Cacao yellow vein banding virus	species
1	2169746	Mythimna unipuncta granulovirus B	species
1	2170205	White-tufted-ear marmoset simian foamy virus	species
1	2170206	Yellow-breasted capuchin simian foamy virus	species
1	221703	Simian foamy virus Pongo pygmaeus pygmaeus	no rank
1	2250214	Escherichia virus KFS-EC	species
1	2282206	Bufonid herpesvirus 1	species
1	2283270	Caulobacter phage CcrBL9	no rank
1	2301619	Mycobacterium phage Serendipitous	species
1	2304025	Cryptophlebia peltastica nucleopolyhedrovirus	species
1	2315724	Athtab bunya-like virus	species
1	233894	Aeromonas virus 25	species
1	2419682	Klebsiella phage Pylas	no rank
1	2507862	Gordonia phage Asapag	no rank
1	2530032	Burkholderia phage BcepSaruman	no rank
1	2530033	Burkholderia phage BcepSauron	no rank
1	2560086	Alcyoneusvirus	genus
1	2560094	Asteriusvirus	genus
1	2560128	Eneladusvirus	genus
1	2560371	Canna yellow mottle associated virus	species
1	2593356	Streptomyces phage Braelyn	species
1	262968	Singapore grouper iridovirus	species
1	2656541	Gordonia phage Stormageddon	species
1	2733152	Bertelyvirus	genus
1	2772062	crAssphage cr106_1	species
1	2772072	crAssphage cr112_1	species
1	2842851	Manticavirus	genus
1	2843421	Menderavirus	genus
1	2843447	Ronodorvirus	genus
1	28874	Volepox virus	species
1	342409	White spot syndrome virus	species
1	352209	Chrysochromulina brevifilum virus PW1	species
1	35306	Simbu orthobunyavirus	species
1	356114	Hepatitis C virus genotype 3	genotype
1	362830	Artogeia rapae granulovirus	species
1	36363	Lymphocystis disease virus 1	species
1	37296	Human gammaherpesvirus 8	species
1	376849	Lumpy skin disease virus NI-2490	no rank
1	38012	Malacosoma neustria nucleopolyhedrovirus	species
1	38062	Cassava vein mosaic virus	species
1	384848	Corynebacterium phage P1201	no rank
1	389214	Ranid herpesvirus 2	species
1	390845	Aedes flavivirus	species
1	42683	Paramecium bursaria Chlorella virus CVA-1	no rank
1	445686	Synechococcus phage S-SSM7	species
1	45455	Macacine gammaherpesvirus 4	species
1	46021	Paramecium bursaria Chlorella virus NY2A	species
1	46242	Spodoptera litura nucleopolyhedrovirus	species
1	490110	Curionopolis virus	no rank
1	51313	Helicoverpa armigera nucleopolyhedrovirus	species
1	515444	Eupatorium vein clearing virus	species
1	548681	Herpesvirales	order
1	548687	Macavirus	genus
1	552509	Leptopilina boulardi filamentous virus	species
1	566270	Spodoptera litura nucleopolyhedrovirus II	species
1	573172	Vibrio phage eugene 12A10	species
1	574230	Cotesia marginiventris bracovirus	species
1	638660	Short-finned eel ranavirus	species
1	710545	Durham virus	no rank
1	727977	Bat adenovirus TJM	serotype
1	756277	Synechococcus phage S-CBP2	no rank
1	80341	Equid alphaherpesvirus 3	species
1	880161	Micromonas sp. RCC1109 virus MpV1	species
1	889813	Colobus guereza papillomavirus 2	serotype
1	889953	Cyanophage KBS-S-2A	species
1	942034	Cyclovirus PKgoat11/PAK/2009	no rank
1	946046	Ugandan cassava brown streak virus	species
1	994601	Planktothrix phage PaV-LD	species

## Sheet: MetaPhlAn2
reads	taxID	taxName	rank
13160	180230	Cyprinid herpesvirus 3	species
8100	432587	Gryllus bimaculatus nudivirus	species
5644	1217711	Acinetobacter sp. NIPH 236	species
5320	317858	Cyprinid herpesvirus 1	species
4928	50290	Aotine betaherpesvirus 1	species
3751	419435	Glypta fumiferanae ichnovirus	species
3132	5825	Plasmodium chabaudi	species
2861	39640	Cotesia congregata bracovirus	species
2845	5693	Trypanosoma cruzi	species
2824	190893	Vibrio coralliilyticus	species
2540	5861	Plasmodium yoelii	species
1783	156974	Dysgonomonas gadei	species
1731	665942	Desulfovibrio sp. 6_1_46AFAA	species
1590	95611	Curtobacterium sp. B8	species
1282	150286	Anguillid herpesvirus 1	species
1202	265522	Hyposoter fugitivus ichnovirus	species
1192	5782	Dictyostelium	genus
1053	5821	Plasmodium berghei	species
828	10401	Ictalurid herpesvirus 1	species
806	28871	Taterapox virus	species
717	489	Neisseria polysaccharea	species
580	5671	Leishmania infantum	species
532	10243	Cowpox virus	species
497	210	Helicobacter pylori	species
383	2754056	Xanthomonas hortorum pv. gardneri	no rank
304	5802	Eimeria tenella	species
220	35252	Alcelaphine gammaherpesvirus 1	species
171	5833	Plasmodium falciparum	species
151	2587410	Thermothielavioides terrestris	species
113	1261657	Murid betaherpesvirus 8	species
88	197575	Haemophilus aegyptius	species
78	305674	Deerpox virus W-848-83	no rank
68	442694	Xanthomonas perforans	species
60	554	Pectobacterium carotovorum	species
57	1186051	Blattabacterium sp. (Blaberus giganteus)	species
54	85618	Ateline gammaherpesvirus 3	species
48	35244	Bovine alphaherpesvirus 5	species
44	457387	Bacteroides sp. 1_1_30	species
39	28449	Neisseria subflava	species
37	10320	Bovine alphaherpesvirus 1	species
37	35718	Chaetomiaceae	family
36	1182515	Mannheimia phage vB_MhM_1152AP	no rank
36	382	Sinorhizobium meliloti	species
35	10385	Bovine gammaherpesvirus 4	species
34	644610	Nyamanini nyavirus	species
31	450749	Veillonella sp. 6_1_27	species
31	469591	Parabacteroides sp. 20_3	species
27	10310	Human alphaherpesvirus 2	species
26	11830	Murine osteosarcoma virus	species
24	76773	Malassezia globosa	species
22	1127516	Pectobacterium phage ZF40	species
22	190065	Fowl aviadenovirus E	species
22	29271	Dasheen mosaic virus	species
21	10381	Saimiriine gammaherpesvirus 2	species
19	5811	Toxoplasma gondii	species
18	191863	Chthoniobacter flavus	species
16	1069631	Alcaligenes sp. HPC1271	species
15	964	Herbaspirillum seropedicae	species
14	63400	Trichophyton benhamiae	species
13	1134474	Cellvibrio sp. BR	species
13	1293539	Choristoneura rosaceana entomopoxvirus 'L'	no rank
11	6029	Microsporidia	phylum
9	1394141	Ferret papillomavirus	species
9	550	Enterobacter cloacae	species
8	12657	Equid gammaherpesvirus 2	species
8	4895	Schizosaccharomyces	genus
7	320432	Chrysodeixis chalcites nucleopolyhedrovirus	species
7	861	Fusobacterium ulcerans	species
6	10325	Macacine alphaherpesvirus 1	species
6	10353	Saimiriine alphaherpesvirus 1	species
6	35246	Cercopithecine alphaherpesvirus 9	species
5	11867	Avian myelocytomatosis virus	species
5	1505	Paeniclostridium sordellii	species
4	432096	Kazachstania africana	species
4	47715	Lacticaseibacillus rhamnosus	species
3	369960	Porcine type-C oncovirus	species
3	5022	Leptosphaeria maculans	species
3	535744	Cronobacter universalis	species
3	550	Enterobacter cloacae	species
2	10317	Cercopithecine alphaherpesvirus 2	species
2	1177763	Omegapapillomavirus 1	species
2	11885	Fujinami sarcoma virus	species
2	146015	Elephantid betaherpesvirus 1	species
2	1608255	Suid betaherpesvirus 2	species
1	10271	Rabbit fibroma virus	species
1	10492	Ranavirus	genus
1	11663	Ovine lentivirus	species
1	118322	Lyngbya aestuarii	species
1	134392	Saimiriine herpesvirus 3	species
1	270478	Zantedeschia mild mosaic virus	species
1	44689	Dictyostelium discoideum	species
